# Supplementary material for: Diastereo- and enantioselective direct vinylogous Michael addition of γ-substituted butenolides to 2-enoylpyridines catalyzed by chiral bifunctional amine-squaramides
Source: Royal Society of Chemistry journal article supplement (doi:10.1039/c5cc06383c), 2015-01-01
Supplement: c5cc06383c1.pdf [file c5cc06383c1.pdf]

# Diastereo- and Enantioselective Direct Vinylogous Michael Addition of $\gamma$ -Substituted Butenolides to 2-Enoylpyridines Catalyzed by Chiral Bifunctional Amine-Squaramides

Zhen-Hua Wang,<sup>a,c</sup> Zhi-Jun Wu,<sup>b</sup> Deng-Feng Yue,<sup>a,c</sup> Yong You,<sup>a,c</sup> Xiao-Ying  
Xu,<sup>\*a</sup> Xiao-Mei Zhang<sup>a</sup> and Wei-Cheng Yuan<sup>\*a</sup>

<sup>a</sup>National Engineering Research Center of Chiral Drugs, Chengdu Institute of Organic  
Chemistry, Chinese Academy of Sciences, Chengdu 610041, China

<sup>b</sup>Chengdu Institute of Biology, Chinese Academy of Sciences, Chengdu 610041, China

<sup>c</sup>University of Chinese Academy of Sciences, Beijing 100049, China

\*E-mail: yuanwc@cioc.ac.cn

xuxy@cioc.ac.cn

## Supporting Information

### Table of Contents

|                                                                                                                                      |     |
|--------------------------------------------------------------------------------------------------------------------------------------|-----|
| 1. General experimental information.....                                                                                             | S1  |
| 2. General procedure for the synthesis of bifunctional catalysts and starting materials.....                                         | S1  |
| 2.1. Typical procedure to prepare <b>1a</b> .....                                                                                    | S1  |
| 2.2. The synthesis of enoylpyridines.....                                                                                            | S2  |
| 2.3. References.....                                                                                                                 | S3  |
| 3. General experimental procedure for asymmetric synthesis of compounds <b>3</b> .....                                               | S4  |
| 4. X-ray crystal structure of compound <b>3q</b> .....                                                                               | S12 |
| 5. <sup>1</sup> H, <sup>13</sup> C NMR and HPLC spectra for compounds <b>3a-x</b> and compounds <b>4, 4', 8, 10</b> and <b>12</b> .. | S14 |

## 1. General experimental information

Reagents were purchased from commercial sources and were used as received unless mentioned otherwise. Reactions were monitored by TLC.  $^1\text{H}$  NMR and  $^{13}\text{C}$  NMR spectra were recorded in  $\text{CDCl}_3$  and  $\text{DMSO-}d_6$ .  $^1\text{H}$  NMR chemical shifts are reported in ppm relative to tetramethylsilane (TMS) with the solvent resonance employed as the internal standard ( $\text{CDCl}_3$  at 7.26 ppm,  $\text{DMSO-}d_6$  at 2.50 ppm). Data are reported as follows: chemical shift, multiplicity (s = singlet, br s = broad singlet, d = doublet, t = triplet, q = quartet, m = multiplet), coupling constants (Hz) and integration.  $^{13}\text{C}$  NMR chemical shifts are reported in ppm from tetramethylsilane (TMS) with the solvent resonance as the internal standard ( $\text{CDCl}_3$  at 77.20 ppm,  $\text{DMSO-}d_6$  at 39.51 ppm). Melting points were recorded on a melting point apparatus.

## 2. General procedure for the synthesis of bifunctional catalysts and starting materials.

Various chiral Bifunctional catalysts **A**,<sup>1a</sup> **B**,<sup>1b</sup> **C**,<sup>1b</sup> **D**<sup>1c</sup> and **E**<sup>1d</sup> were prepared by the corresponding literature procedures. Various  $\gamma$ -Substituted butenolides **1a-1f** were prepared according to the literatures.<sup>2,3</sup> **1g** was purchased from Urchem. 2-Enoylpyridines **2a-2q** were prepared according to the literature reported by Singh and co-workers.<sup>4</sup> 2-Enoylpyridine **2r**<sup>5</sup> and **2s**<sup>6</sup> were prepared according to the literatures.

### 2.1 Typical procedure to prepare $\gamma$ -phenyl butenolide (**1a**).

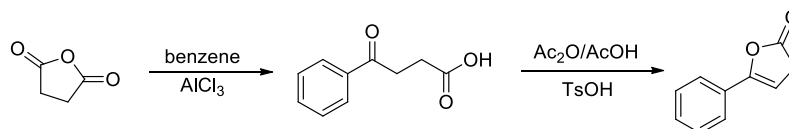

**Step 1.** Benzene (20 mL, 17.5 g, 225 mmol) and succinic anhydride (3.4 g, 34 mmol) were combined in a 100 mL flask equipped with a reflux condenser. The succinic anhydride was dissolved in the benzene, and then anhydrous aluminum chloride (10 g, 75 mmol) was added and the reaction started immediately and HCl was evolved. The resulting mixture was stirred for 30 min at room temperature and then warmed up for 1h at 80 °C. The solution was cooled in cold water. Then dilute HCl (20 mL, 10%) were added. Excess benzene was removed by steam distillation. The residue was cooled and filtered on a Buchner funnel and washed with dilute HCl (20 mL, 10%). The solid was dissolved in  $\text{Na}_2\text{CO}_3$  (4 g in 25 mL  $\text{H}_2\text{O}$ ) and then stirred for 15 min. The filtrate was cooled and acidified by conc. HCl and the precipitated acid was collected by filtration, dried at 50 °C and gave 4.2 g, 78% yield.

**Step 2.** Benzoylpropionic acid (4.2 g, 26 mmol) was slurried in  $\text{Ac}_2\text{O}$  (5 mL) and AcOH (3 mL) containing a catalytic amount of *p*-toluene sulphonic acid (30 mg). The slurry was allowed to stir for 2 h. The solid was dissolved and then the mixture was diluted with distilled water (7 mL), stirred for 30 min and the product was collected by filtration to give an off white crystalline solid which was washed with  $\text{H}_2\text{O}/\text{AcOH}$  (V/V = 1:1) then  $\text{H}_2\text{O}$ . The crude product was crystallized with methanol and gave 2.2 g desired product, 60% yield.

## 2.2 The synthesis of enoylpyridines

### 2.2.1 General procedure to prepare 2-Enoylpyridines **2a-2q**

2-Enoylpyridines **2a-2q** were prepared according to the literature reported by Singh and co-workers and slightly modified.

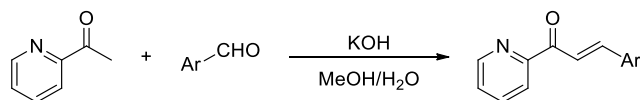

Potassium hydroxide solution (15 mL, 1 N) was added to a solution of 2-acetylpyridine (21 mmol) and aldehyde (20 mmol) in methanol (45 mL) at 0 °C. The reaction mixture was warmed to room temperature and stirred for 3 h. The precipitate was collected by filtration and then washed with water (25 mL). The filter cake was recrystallized with methanol.

### 2.2.2 Typical procedure to prepare 2-Enoylpyridine **2r**

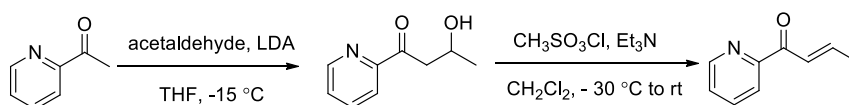

**Step 1.** 2-Acetylpyridine (2.4 g, 20 mmol) was added dropwise to a solution of LDA prepared from dry diisopropylamine (3.3 g, 4.6 mL, 30 mmol) and n-BuLi (2.5 N, 12 mL, 30 mmol) in dry THF (30 mL) cooled at -15 °C. The resulting solution was stirred at -15 °C for 2 h. Acetaldehyde (1.76 g, 2.2 mL, 40 mmol) was added dropwise and the reaction mixture was stirred for 0.5 h at -15 °C followed by the addition of a saturated solution of NH<sub>4</sub>Cl (10 mL). The organic phase was collected, and the aqueous phase was extracted with Et<sub>2</sub>O (50 mL). The organic phase was combined and dried over Na<sub>2</sub>SO<sub>4</sub>, and the solvent was evaporated. The crude product was purified on a column of silica gel and eluted with petroleum ether - EtOAc (3:2). 0.9 g of 3-hydroxy-1-(pyridin-2-yl)butan-1-one was obtained.

**Step 2.** 3-hydroxy-1-(pyridin-2-yl)butan-1-one (0.9 g, 5.4 mmol) was dissolved in CH<sub>2</sub>Cl<sub>2</sub> (15 mL), and the solution was cooled to -30 °C. Et<sub>3</sub>N (2.6 mL, 18.7 mmol) was added, and then methanesulfonyl chloride (0.6 mL, 7.8 mmol) was added dropwise. The solution was allowed to reach ambient temperature and stirred for 12 h. The dark solution was filtered with diatomite. Evaporation of solvent and purification on a column of silica gel eluting with petroleum ether - EtOAc (5:1) afforded 0.4 g of compound **2r** (yellow oil).

### 2.2.3 Typical procedure to prepare 2-Enoylpyridine **2s**

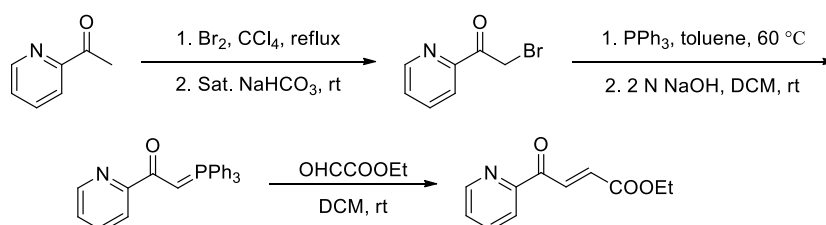

**Step 1.** 1-(pyridin-2-yl)ethanone (2.0 g, 16.6 mmol) was dissolved in CCl<sub>4</sub> (60 mL) and stirred at room temperature. Br<sub>2</sub> (2.7 g, 16.6 mmol) was added dropwise. And then the solution was refluxed at 70 °C for 1 h. The precipitate was collected by filtration and then washed with Et<sub>2</sub>O. The precipitate was dissolved in sat. NaHCO<sub>3</sub> solution and stirred for 30 min at ambient temperature, Reaction mixture was extracted with DCM (3 × 25 mL). The combined organic

phase was washed with brine (1 × 30 mL), dried over anh. Na<sub>2</sub>SO<sub>4</sub> and concentrated under reduced pressure. Obtained pale yellow oil and used without purification.

**Step 2.** Crude product was dissolved in toluene (60 mL) and was added PPh<sub>3</sub> (4.35 g, 16.6 mmol). The resulting mixture was warmed gradually to 60 °C and stirred at 60 °C for 12 h. The white precipitate was collected by filtration and then the solid was dissolved in DCM (60 mL). NaOH solution (2 N, 15 mL) was added dropwise and stirred for 6 h. The mixture diluted with H<sub>2</sub>O (50 mL). Organic was separated and the aqueous layer was extracted with CH<sub>2</sub>Cl<sub>2</sub> (2 × 25 mL). The combined organic phase was washed with brine (1 × 30 mL), dried over anh. Na<sub>2</sub>SO<sub>4</sub> and concentrated under reduced pressure. Brown solid was obtained.

**Step 3.** Brown solid was dissolved in DCM (25 mL) and ethyl glyoxylate (50% w.t. in toluene, 3.5 g, 17.1 mmol) was added dropwise. The mixture was stirred at room temperature for 12 h. The resulting mixture was concentrated under reduced pressure. Purification by column chromatography over silica gel using petroleum ether - EtOAc as eluent afforded **2s** (0.94 g, total yield 28%).

### 2.3. References

1. (a). T. Okino, Y. Hoashi and Y. Takemoto, *J. Am. Chem. Soc.* 2003, **125**, 12672; (b). M. Kaik and J. Gawroński. *Tetrahedron: Asymmetry* 2003, **14**, 1559; (c). J. Ye, D. J. Dixon and P. S. Hynes, *Chem. Commun*, 2005, 4481; (d). W. Yang and D. M. Du, *Org. Lett.*, 2010, **12**, 5450.
2. S. Žari, M. Kudrjashova, T. Pehk, M. Lopp and T. Kanger, *Org. Lett.*, 2014, **16**, 1740.
3. D. J. Jones, and V. C. Gibson, *Heterocycles*, 2006, **68**, 1128.
4. N. Molleti, N. K. Rana and V. K. Singh, *Org. Lett.*, 2012, **14**, 4322.
5. B Silvia, R Srinivas, YA Skorik and A. Catalina, *Inorganic Chemistry*, 2011, **50**, 11929.
6. D. Anna and K. Petr, *J. Org. Chem*, 2006, **71**, 719.

### 3. General procedure for the synthesis of compounds 3a-x.

In an ordinary vial equipped with a magnetic stirring bar, the compounds **1** (0.10 mmol, 1.0 equiv), compounds **2** (0.15 mmol, 1.5 equiv) and catalyst **E** (5 mol %) were dissolved in DCE (2 mL), and then the mixture was stirred at 0 °C for the indicated time. After completion of the reaction as indicated by TLC, the products **3** were isolated by flash chromatography on silica gel (petroleum ether/ethyl acetate = 5/1-3/1).

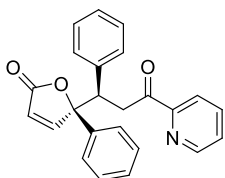

**(S)-5-((R)-3-oxo-1-phenyl-3-(pyridin-2-yl)propyl)-5-phenylfuran-2(5H)-one (3a).** White solid; 31.4 mg, 85% yield; 99:1 dr, 99% ee;  $[\alpha]_D^{20} = +149.1$  (c 1.505,  $\text{CHCl}_3$ ); m.p. 178.2-179.7 °C; HPLC (AD-H, *i*-propanol/*n*-hexane = 30/70, flow rate = 1.0 mL/min,  $\lambda = 254$  nm)  $t_R = 10.8$  min (minor), 13.8 min (major);  $^1\text{H}$  NMR (300 MHz,  $\text{CDCl}_3$ )  $\delta$  3.20-3.31 (m, 1H), 4.22-4.33 (m, 2H), 5.66 (d,  $J = 5.7$  Hz, 1H), 7.12-7.26 (m, 3H), 7.28-7.31 (m, 3H), 7.33-7.40 (m, 3H), 7.50-7.53 (m, 3H), 7.63-7.70 (m, 1H), 7.73-7.76 (m, 1H), 8.62 (d,  $J = 4.5$  Hz, 1H);  $^{13}\text{C}$  NMR (75 MHz,  $\text{CDCl}_3$ )  $\delta$  37.8, 49.2, 92.9, 119.5, 121.6, 125.3, 127.1, 127.4, 128.2, 128.4, 128.8, 128.9, 136.6, 137.9, 138.2, 148.8, 152.8, 159.0, 172.1, 199.2; HRMS (ESI-TOF) calcd. for  $\text{C}_{24}\text{H}_{19}\text{NNaO}_3$   $[\text{M} + \text{Na}]^+$  392.1257, found: 392.1245.

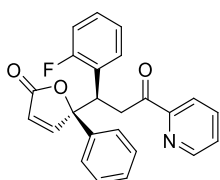

**(S)-5-((R)-1-(2-fluorophenyl)-3-oxo-3-(pyridin-2-yl)propyl)-5-phenylfuran-2(5H)-one (3b).** White solid; 33.0 mg, 85% yield; >99:1 dr, >99% ee;  $[\alpha]_D^{20} = +202.3$  (c 1.650,  $\text{CHCl}_3$ ); m.p. 139.0-141.1 °C; HPLC (AD-H, *i*-propanol/*n*-hexane = 30/70, flow rate = 1.0 mL/min,  $\lambda = 254$  nm)  $t_R = 9.8$  min (minor), 10.7 min (major);  $^1\text{H}$  NMR (300 MHz,  $\text{CDCl}_3$ )  $\delta$  3.20 (dd,  $J = 3.3$  Hz, 18.6 Hz, 1H), 4.36 (dd,  $J = 11.1$  Hz, 18.6 Hz, 1H), 4.74 (dd,  $J = 3.3$  Hz, 11.1 Hz, 1H), 5.64 (d,  $J = 5.7$  Hz, 1H), 6.96-7.02 (m, 2H), 7.12-7.19 (m, 1H), 7.27-7.41 (m, 5H), 7.56-7.63 (m, 3H), 7.66-7.71 (m, 1H), 7.75 (d,  $J = 7.5$  Hz, 1H), 8.63 (d,  $J = 4.2$  Hz, 1H);  $^{13}\text{C}$  NMR (75 MHz,  $\text{CDCl}_3$ )  $\delta$  36.9, 39.9, 92.7, 114.9 (d,  $J = 22.9$  Hz, 1C), 119.7, 121.6, 124.4 (d,  $J = 3.4$  Hz, 1C), 124.8 (d,  $J = 14.0$  Hz, 1C), 125.1, 127.2, 128.4, 128.6 (d,  $J = 3.2$  Hz, 1C), 128.9, 129.0, 136.6, 137.7, 148.9, 152.7, 158.6, 160.7 (d,  $J = 242.8$  Hz, 1C), 172.1, 199.0; HRMS (ESI-TOF) calcd. for  $\text{C}_{24}\text{H}_{18}\text{FNNaO}_3$   $[\text{M} + \text{Na}]^+$  410.1163, found: 410.1169.

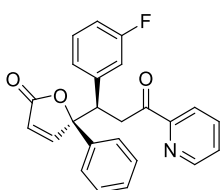

**(S)-5-((R)-1-(3-fluorophenyl)-3-oxo-3-(pyridin-2-yl)propyl)-5-phenylfuran-2(5H)-one (3c).** White solid; 28.8 mg, 74% yield; 99:1 dr, >99% ee;  $[\alpha]_D^{20} = +173.6$  (c 1.440,  $\text{CHCl}_3$ ); m.p. 188.8-190.1 °C; HPLC (AD-H, *i*-propanol/*n*-hexane = 30/70, flow rate = 1.0 mL/min,  $\lambda = 254$  nm)  $t_R = 10.5$  min (major), 12.9 min (minor);  $^1\text{H}$  NMR (300 MHz,  $\text{CDCl}_3$ )  $\delta$  3.16-3.27 (m, 1H), 4.24-4.34 (m, 2H), 5.70 (d,  $J = 5.7$  Hz, 1H), 6.83-6.89 (m, 1H), 7.02 (d,  $J = 9.9$  Hz, 1H), 7.09 (d,  $J = 7.8$  Hz, 1H), 7.15-7.22 (m, 1H), 7.27-7.42 (m, 4H), 7.49-7.54 (m, 3H), 7.66-7.72 (m, 1H), 7.77 (d,  $J = 7.8$  Hz, 1H), 8.63 (d,  $J = 4.5$  Hz, 1H);  $^{13}\text{C}$  NMR (75 MHz,  $\text{CDCl}_3$ )  $\delta$  37.8, 48.9, 92.6, 114.5 (d,  $J = 20.7$  Hz, 1C), 116.0 (d,  $J = 21.5$  Hz, 1C), 119.7, 121.6, 124.4 (d,  $J = 2.8$  Hz, 1C), 125.2, 127.2, 128.4, 129.0, 129.9 (d,  $J = 8.3$  Hz, 1C), 136.6, 137.8, 140.4 (d,  $J = 7.1$  Hz, 1C), 148.9, 152.6, 158.8, 162.5 (d,  $J = 244.8$  Hz, 1C), 171.9, 199.0; HRMS (ESI-TOF) calcd. for  $\text{C}_{24}\text{H}_{18}\text{FNNaO}_3$   $[\text{M} + \text{Na}]^+$  410.1163, found: 410.1172.

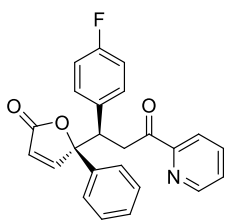

**(S)-5-((R)-1-(4-fluorophenyl)-3-oxo-3-(pyridin-2-yl)propyl)-5-phenylfuran-2(5H)-one (3d).** White solid; 33.1 mg, 86% yield; 94:6 dr, 98% ee;  $[\alpha]_D^{20} = +99.9$  (c 1.655,  $\text{CHCl}_3$ ); m.p. 167.8-169.1 °C; HPLC (AD-H, *i*-propanol/*n*-hexane = 30/70, flow rate = 1.0 mL/min,  $\lambda = 254$  nm)  $t_R = 10.5$  min (minor), 16.0 min (major);  $^1\text{H}$  NMR (300 MHz,  $\text{CDCl}_3$ )  $\delta$  3.13-3.24 (m, 1H), 4.21-4.33 (m, 2H), 5.70 (d,  $J = 5.7$  Hz, 1H), 6.91 (t,  $J = 8.7$  Hz, 2H), 7.24-7.32 (m, 3H), 7.34-7.42 (m, 3H), 7.51 (d,  $J = 6.0$  Hz, 3H), 7.66-7.77 (m, 2H), 8.62 (d,  $J = 4.5$  Hz, 1H);  $^{13}\text{C}$  NMR (75 MHz,  $\text{CDCl}_3$ )  $\delta$  37.9, 48.4, 92.8, 115.3 (d,  $J = 21.1$  Hz, 1C), 119.7, 121.6, 125.2, 127.2, 128.4, 129.0, 130.4 (d,  $J = 8.0$  Hz, 1C), 133.6 (d,  $J = 3.2$  Hz, 1C), 136.7, 137.9, 148.9, 152.7, 159.0, 162.0 (d,  $J = 244.6$  Hz, 1C), 172.0, 199.2; HRMS (ESI-TOF) calcd. for  $\text{C}_{24}\text{H}_{18}\text{FNNaO}_3$   $[\text{M} + \text{Na}]^+$  410.1163, found: 410.1167.

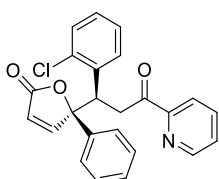

**(S)-5-((R)-1-(2-chlorophenyl)-3-oxo-3-(pyridin-2-yl)propyl)-5-phenylfuran-2(5H)-one (3e).** White solid; 30.8 mg, 76% yield; 99:1 dr, >99% ee;  $[\alpha]_D^{20} = +198.7$  (c 1.540,  $\text{CHCl}_3$ ); m.p. 97.5-99.3 °C; HPLC (AD-H, *i*-propanol/*n*-hexane = 30/70, flow rate = 1.0 mL/min,  $\lambda = 254$  nm)  $t_R = 8.1$  min (minor), 10.4 min (major);  $^1\text{H}$  NMR (300 MHz,  $\text{CDCl}_3$ )  $\delta$  3.23 (dd,  $J = 3.3$  Hz, 18.6 Hz, 1H), 4.40 (dd,  $J = 11.1$  Hz, 18.6 Hz, 1H), 4.98 (dd,  $J = 3.3$  Hz, 11.1 Hz, 1H), 5.59 (d,  $J = 5.7$  Hz, 1H), 7.09-7.16 (m, 2H), 7.28-7.45 (m, 6H), 7.62 (d,  $J = 7.8$  Hz, 2H), 7.65-7.76 (m, 3H), 8.62 (d,  $J = 4.8$  Hz, 1H);  $^{13}\text{C}$  NMR (75 MHz,  $\text{CDCl}_3$ )  $\delta$  37.9, 44.1, 92.9, 119.4, 121.5, 125.0, 127.2, 127.3, 128.4, 128.5, 128.6, 129.1, 129.4, 134.7, 135.6, 136.6, 137.9, 148.8, 152.7, 158.4, 172.1, 199.1; HRMS (ESI-TOF) calcd. for  $\text{C}_{24}\text{H}_{18}\text{ClNNaO}_3$   $[\text{M} + \text{Na}]^+$  426.0867, found: 426.0886.

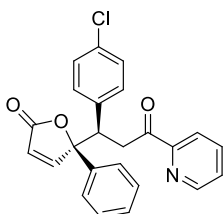

**(S)-5-((R)-1-(4-chlorophenyl)-3-oxo-3-(pyridin-2-yl)propyl)-5-phenylfuran-2(5H)-one (3f).** White solid; 29.5 mg, 73% yield; 96:4 dr, 99% ee;  $[\alpha]_D^{20} = +138.7$  (c 1.475,  $\text{CHCl}_3$ ); m.p. 191.2-193.1 °C; HPLC (AD-H, *i*-propanol/*n*-hexane = 30/70, flow rate = 1.0 mL/min,  $\lambda = 254$  nm)  $t_R = 13.1$  min (minor), 17.6 min (major);  $^1\text{H}$  NMR (300 MHz,  $\text{CDCl}_3$ )  $\delta$  3.13-3.24 (m, 1H), 4.23-4.34 (m, 2H), 5.71 (d,  $J = 5.7$  Hz, 1H), 7.17-7.26 (m, 4H), 7.31 (d,  $J = 7.2$  Hz, 1H), 7.35-7.42 (m, 3H), 7.51 (d,  $J = 6.0$  Hz, 3H), 7.66-7.72 (m, 1H), 7.76 (d,  $J = 7.8$  Hz, 1H), 8.62 (d,  $J = 4.2$  Hz, 1H);  $^{13}\text{C}$  NMR (75 MHz,  $\text{CDCl}_3$ )  $\delta$  37.8, 48.6, 92.6, 119.8, 121.6, 125.2, 127.3, 128.4, 128.6, 129.0, 130.2, 133.3, 136.4, 136.7, 137.8, 148.9, 152.6, 158.9, 171.9, 199.1; HRMS (ESI-TOF) calcd. for  $\text{C}_{24}\text{H}_{18}\text{ClNNaO}_3$   $[\text{M} + \text{Na}]^+$  426.0867, found: 426.0875.

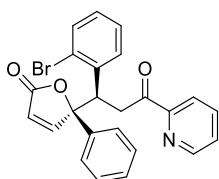

**(S)-5-((R)-1-(2-bromophenyl)-3-oxo-3-(pyridin-2-yl)propyl)-5-phenylfuran-2(5H)-one (3g).** White solid; 33.1 mg, 74% yield; >99:1 dr, >99% ee;  $[\alpha]_D^{20} = +179.2$  (c 1.655,  $\text{CHCl}_3$ ); m.p. 92.5-93.9 °C; HPLC (AD-H, *i*-propanol/*n*-hexane = 30/70, flow rate = 1.0 mL/min,  $\lambda = 254$  nm)  $t_R = 8.6$  min (minor), 10.7 min (major);  $^1\text{H}$  NMR (300 MHz,  $\text{CDCl}_3$ )  $\delta$  3.23 (dd,  $J = 3.3$  Hz, 18.6 Hz, 1H), 4.39 (dd,  $J = 11.1$  Hz, 18.6 Hz, 1H), 4.97 (dd,  $J = 3.3$  Hz, 11.1 Hz, 1H), 5.59 (d,  $J = 5.7$  Hz, 1H), 7.00-7.05 (m, 1H), 7.15-7.21 (m, 1H), 7.28-7.44 (m, 5H), 7.54 (d,  $J = 7.8$  Hz, 1H), 7.62-7.70 (m, 3H), 7.73-7.77 (m, 2H), 8.62 (d,  $J =$

4.2 Hz, 1H);  $^{13}\text{C}$  NMR (75 MHz,  $\text{CDCl}_3$ )  $\delta$  38.2, 47.2, 92.9, 119.3, 121.5, 125.0, 126.2, 127.2, 127.9, 128.4, 128.6, 128.9, 129.1, 132.8, 136.6, 137.2, 137.9, 148.8, 152.6, 158.5, 172.1, 199.0; HRMS (ESI-TOF) calcd. for  $\text{C}_{24}\text{H}_{18}\text{BrNNaO}_3$   $[\text{M} + \text{Na}]^+$  470.0362, found: 470.0372.

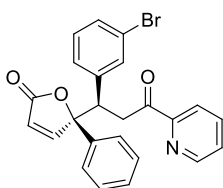

**(S)-5-((R)-1-(3-bromophenyl)-3-oxo-3-(pyridin-2-yl)propyl)-5-phenylfuran-2(5H)-one (3h).** White solid; 39.0 mg, 87% yield; >99:1 dr, 98% ee;  $[\alpha]_{\text{D}}^{20} = +81.4$  (c 1.950,  $\text{CHCl}_3$ ); m.p. 208.9-210.3 °C; HPLC (AD-H, *i*-propanol/*n*-hexane = 30/70, flow rate = 1.0 mL/min,  $\lambda = 254$  nm)  $t_{\text{R}} = 11.1$  min (major), 14.3 min (minor);  $^1\text{H}$  NMR (300 MHz, DMSO)  $\delta$  3.01 (dd,  $J = 1.8$  Hz, 17.4 Hz, 1H), 4.16 (dd,  $J = 11.1$  Hz, 17.7 Hz, 1H), 4.31 (dd,  $J = 2.7$  Hz, 11.1 Hz, 1H), 5.88 (d,  $J = 5.7$  Hz, 1H), 7.14-7.19 (m, 1H), 7.28-7.36 (m, 3H), 7.41-7.46 (m, 2H), 7.58-7.69 (m, 5H), 7.85-7.90 (m, 1H), 8.16 (d,  $J = 5.7$  Hz, 1H), 8.69 (d,  $J = 4.5$  Hz, 1H);  $^{13}\text{C}$  NMR (75 MHz, DMSO)  $\delta$  36.9, 47.6, 92.2, 118.6, 121.2, 121.3, 125.2, 127.5, 128.0, 128.3, 129.0, 130.1, 132.3, 137.6, 138.2, 140.8, 149.2, 152.1, 161.3, 171.8, 198.7; HRMS (ESI-TOF) calcd. for  $\text{C}_{24}\text{H}_{18}\text{BrNNaO}_3$   $[\text{M} + \text{Na}]^+$  470.0362, found: 470.0357.

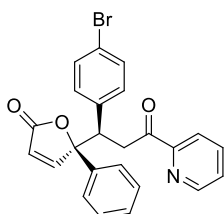

**(S)-5-((R)-1-(4-bromophenyl)-3-oxo-3-(pyridin-2-yl)propyl)-5-phenylfuran-2(5H)-one (3i).** White solid; 33.5 mg, 75% yield; 98:2 dr, 99% ee;  $[\alpha]_{\text{D}}^{20} = +131.7$  (c 1.675,  $\text{CHCl}_3$ ); m.p. 177.9-178.8 °C; HPLC (AD-H, *i*-propanol/*n*-hexane = 30/70, flow rate = 1.0 mL/min,  $\lambda = 254$  nm)  $t_{\text{R}} = 16.8$  min (minor), 20.8 min (major);  $^1\text{H}$  NMR (300 MHz,  $\text{CDCl}_3$ )  $\delta$  3.11-3.24 (m, 1H), 4.21-4.34 (m, 2H), 5.71 (d,  $J = 5.7$  Hz, 1H), 7.18 (d,  $J = 8.4$  Hz, 2H), 7.27-7.42 (m, 6H), 7.51 (d,  $J = 6.0$  Hz, 3H), 7.66-7.77 (m, 2H), 8.62 (d,  $J = 4.5$  Hz, 1H);  $^{13}\text{C}$  NMR (75 MHz,  $\text{CDCl}_3$ )  $\delta$  37.7, 48.6, 92.6, 119.8, 121.5, 121.6, 125.2, 127.3, 128.4, 129.0, 130.5, 131.5, 136.7, 136.9, 137.8, 148.9, 152.6, 158.8, 171.9, 199.1; HRMS (ESI-TOF) calcd. for  $\text{C}_{24}\text{H}_{18}\text{BrNNaO}_3$   $[\text{M} + \text{Na}]^+$  470.0362, found: 470.0360.

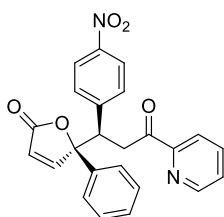

**(S)-5-((R)-1-(4-nitrophenyl)-3-oxo-3-(pyridin-2-yl)propyl)-5-phenylfuran-2(5H)-one (3j).** White solid; 36.3 mg, 88% yield; >99:1 dr, 99% ee;  $[\alpha]_{\text{D}}^{20} = +154.5$  (c 1.815,  $\text{CHCl}_3$ ); m.p. 153.5-154.4 °C; HPLC (AD-H, *i*-propanol/*n*-hexane = 30/70, flow rate = 1.0 mL/min,  $\lambda = 254$  nm)  $t_{\text{R}} = 17.0$  min (minor), 29.4 min (major);  $^1\text{H}$  NMR (300 MHz,  $\text{CDCl}_3$ )  $\delta$  3.19-3.30 (m, 1H), 4.31-4.37 (m, 2H), 5.72 (d,  $J = 5.4$  Hz, 1H), 7.32-7.40 (m, 4H), 7.49-7.56 (m, 5H), 7.68-7.76 (m, 2H), 8.09 (d,  $J = 8.1$  Hz, 2H), 8.63 (d,  $J = 3.3$  Hz, 1H);  $^{13}\text{C}$  NMR (75 MHz,  $\text{CDCl}_3$ )  $\delta$  37.9, 49.0, 92.1, 120.1, 121.6, 123.6, 125.1, 127.5, 128.7, 129.2, 129.9, 136.8, 137.3, 145.6, 147.2, 149.0, 152.4, 158.5, 171.5, 198.8; HRMS (ESI-TOF) calcd. for  $\text{C}_{24}\text{H}_{18}\text{N}_2\text{NaO}_5$   $[\text{M} + \text{Na}]^+$  437.1108, found: 437.1107.

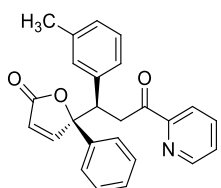

**(S)-5-((R)-3-oxo-3-(pyridin-2-yl)-1-(m-tolyl)propyl)-5-phenylfuran-2(5H)-one (3k).** White solid, 32.2 mg, 84% yield; >99:1 dr, >99% ee;  $[\alpha]_{\text{D}}^{20} = +72.2$  (c 1.610,  $\text{CHCl}_3$ ); m.p. 170.5-171.7 °C; HPLC (AD-H, EtOH/*n*-hexane = 30/70, flow rate = 1.0 mL/min,  $\lambda = 254$  nm)  $t_{\text{R}} = 7.8$  min (minor), 9.8 min (major);  $^1\text{H}$  NMR (300 MHz,  $\text{CDCl}_3$ )  $\delta$  2.26 (s, 3H), 3.19-3.30 (m, 1H), 4.21-4.32 (m, 2H), 5.66 (d,  $J = 5.7$  Hz, 1H), 6.96-6.98 (m, 1H), 7.08-7.13 (m, 3H), 7.27-7.31 (m, 1H), 7.33-7.41 (m, 3H), 7.51 (d,  $J = 6.3$  Hz, 3H), 7.65-7.71

(m, 1H), 7.76 (d,  $J = 7.8$  Hz, 1H), 8.63 (d,  $J = 4.5$  Hz, 1H);  $^{13}\text{C}$  NMR (75 MHz,  $\text{CDCl}_3$ )  $\delta$  21.4, 37.8, 49.1, 93.0, 119.4, 121.6, 125.3, 125.8, 127.1, 128.2, 128.8, 129.7, 136.6, 137.8, 137.9, 138.2, 148.8, 152.8, 159.1, 172.3, 199.3; HRMS (ESI-TOF) calcd. for  $\text{C}_{25}\text{H}_{21}\text{NNaO}_3$  [ $\text{M} + \text{Na}$ ] $^+$  406.1414, found: 406.1410.

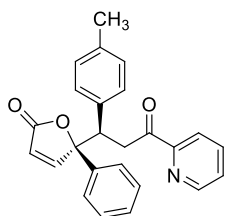

**(S)-5-((R)-3-oxo-3-(pyridin-2-yl)-1-(p-tolyl)propyl)-5-phenylfuran-2(5H)-one (3l).** White solid; 23.4 mg, 61% yield; >99:1 dr, 99% ee;  $[\alpha]_{\text{D}}^{20} = +108.8$  (c 1.170,  $\text{CHCl}_3$ ); m.p. 165.1-166.4  $^{\circ}\text{C}$ ; HPLC (AD-H, *i*-propanol/*n*-hexane = 30/70, flow rate = 1.0 mL/min,  $\lambda = 254$  nm)  $t_{\text{R}} = 14.9$  min (minor), 16.5 min (major);  $^1\text{H}$  NMR (300 MHz,  $\text{CDCl}_3$ )  $\delta$  2.24 (s, 3H), 3.22 (m, 1H), 4.22-4.33 (m, 2H), 5.67 (d,  $J = 5.7$  Hz, 1H), 7.02 (d,  $J = 7.8$  Hz, 2H), 7.17 (d,  $J = 7.5$  Hz, 2H), 7.30 (d,  $J = 6.9$  Hz, 1H), 7.34-7.39 (m, 3H), 7.51 (d,  $J = 6.9$  Hz, 3H), 7.68 (t,  $J = 7.5$  Hz, 1H), 7.76 (d,  $J = 7.8$  Hz, 1H), 8.62 (d,  $J = 3.9$  Hz, 1H);  $^{13}\text{C}$  NMR (75 MHz,  $\text{CDCl}_3$ )  $\delta$  21.0, 37.9, 48.7, 93.1, 119.5, 121.6, 125.3, 127.1, 128.2, 128.7, 128.9, 129.1, 134.7, 136.6, 137.0, 138.2, 148.8, 152.8, 159.2, 172.3, 199.4; HRMS (ESI-TOF) calcd. for  $\text{C}_{25}\text{H}_{21}\text{NNaO}_3$  [ $\text{M} + \text{Na}$ ] $^+$  406.1414, found: 406.1407.

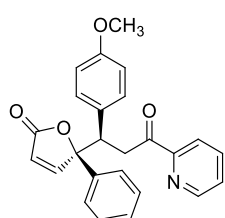

**(S)-5-((R)-1-(4-methoxyphenyl)-3-oxo-3-(pyridin-2-yl)propyl)-5-phenylfuran-2(5H)-one (3m).** White solid; 28.5 mg, 71% yield; 92:8 dr, 96% ee;  $[\alpha]_{\text{D}}^{20} = +224.8$  (c 1.425,  $\text{CHCl}_3$ ); m.p. 148.2-149.1  $^{\circ}\text{C}$ ; HPLC (AD-H, *i*-propanol/*n*-hexane = 30/70, flow rate = 1.0 mL/min,  $\lambda = 254$  nm)  $t_{\text{R}} = 19.8$  min (minor), 27.3 min (major);  $^1\text{H}$  NMR (300 MHz,  $\text{CDCl}_3$ )  $\delta$  3.13-3.24 (m, 1H), 3.70 (s, 3H), 4.20-4.31 (m, 2H), 5.68 (d,  $J = 5.7$  Hz, 1H), 6.73 (d,  $J = 8.4$  Hz, 2H), 7.20 (d,  $J = 8.4$  Hz, 2H), 7.29 (d,  $J = 7.2$  Hz, 1H), 7.32-7.38 (m, 3H), 7.49-7.52 (m, 3H), 7.64-7.69 (m, 1H), 7.75 (d,  $J = 7.8$  Hz, 1H), 8.61 (d,  $J = 4.2$  Hz, 1H);  $^{13}\text{C}$  NMR (75 MHz,  $\text{CDCl}_3$ )  $\delta$  37.9, 48.3, 55.0, 93.1, 113.6, 119.4, 121.5, 125.2, 127.1, 128.2, 128.8, 129.7, 129.8, 136.5, 138.1, 148.8, 152.7, 158.6, 159.2, 172.2, 199.3; HRMS (ESI-TOF) calcd. for  $\text{C}_{25}\text{H}_{21}\text{NNaO}_4$  [ $\text{M} + \text{Na}$ ] $^+$  422.1363, found: 422.1361.

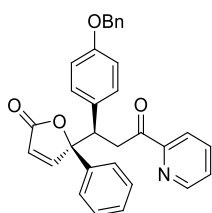

**(S)-5-((R)-1-(4(benzyloxy)phenyl)-3-oxo-3-(pyridin-2-yl)propyl)-5-phenylfuran-2(5H)-one (3n).** White solid; 34.5 mg, 72% yield; >99:1 dr, 99% ee;  $[\alpha]_{\text{D}}^{20} = +74.7$  (c 1.725,  $\text{CHCl}_3$ ); m.p. 166.1-168.2  $^{\circ}\text{C}$ ; HPLC (AD-H, *i*-propanol/*n*-hexane = 30/70, flow rate = 1.0 mL/min,  $\lambda = 254$  nm)  $t_{\text{R}} = 17.1$  min (minor), 36.7 min (major);  $^1\text{H}$  NMR (300 MHz,  $\text{CDCl}_3$ )  $\delta$  3.15-3.25 (m, 1H), 4.20-4.31 (m, 2H), 4.91-4.96 (m, 2H), 5.69 (d,  $J = 5.7$  Hz, 1H), 6.83 (d,  $J = 8.7$  Hz, 2H), 7.21 (d,  $J = 8.7$  Hz, 2H), 7.28-7.41 (m, 9H), 7.51 (d,  $J = 5.7$  Hz, 3H), 7.66-7.72 (m, 1H), 7.77 (d,  $J = 7.8$  Hz, 1H), 8.63 (d,  $J = 4.2$  Hz, 1H);  $^{13}\text{C}$  NMR (75 MHz,  $\text{CDCl}_3$ )  $\delta$  38.0, 48.4, 69.8, 93.2, 114.6, 119.6, 121.6, 125.3, 127.1, 127.5, 127.9, 128.2, 128.5, 128.9, 129.9, 130.1, 136.6, 136.8, 138.2, 148.8, 152.8, 158.0, 159.2, 172.3, 199.4; HRMS (ESI-TOF) calcd. for  $\text{C}_{31}\text{H}_{25}\text{NNaO}_4$  [ $\text{M} + \text{Na}$ ] $^+$  498.1676, found: 498.1681.

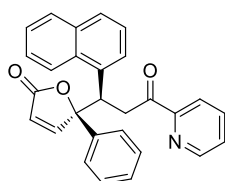

**(S)-5-((R)-1-(naphthalen-1-yl)-3-oxo-3-(pyridin-2-yl)propyl)-5-phenylfuran-2(5H)-one (3o).** White solid; 27.1 mg, 65% yield; 98:2 dr, 98% ee;  $[\alpha]_{\text{D}}^{20} = +213.9$  (c 1.355,  $\text{CHCl}_3$ ); m.p. 166.5-167.8  $^{\circ}\text{C}$ ; HPLC (AD-H, *i*-propanol/*n*-hexane = 30/70, flow rate = 1.0 mL/min,  $\lambda = 254$  nm)  $t_{\text{R}} = 9.9$  min (minor), 14.6 min (major);  $^1\text{H}$  NMR (300 MHz,  $\text{CDCl}_3$ )



$\delta$  3.40 (dd,  $J = 3.3$  Hz, 18.3 Hz, 1H), 4.58 (dd,  $J = 10.5$  Hz, 18.3 Hz, 1H), 5.31-5.38 (m, 2H), 7.29-7.45 (m, 6H), 7.48-7.53 (m, 1H), 7.61-7.70 (m, 7H), 7.84 (d,  $J = 8.1$  Hz, 1H), 8.46 (d,  $J = 8.4$  Hz, 1H), 8.65 (d,  $J = 4.5$  Hz, 1H);  $^{13}\text{C}$  NMR (75 MHz,  $\text{CDCl}_3$ )  $\delta$  38.6, 42.0, 93.0, 119.1, 121.6, 122.3, 125.2, 125.3, 125.5, 126.5, 127.1, 128.0, 128.3, 129.0, 129.3, 132.2, 133.7, 134.0, 136.6, 138.4, 148.8, 152.8, 158.2, 172.2, 199.4; HRMS (ESI-TOF) calcd. for  $\text{C}_{28}\text{H}_{21}\text{NNaO}_3$   $[\text{M} + \text{Na}]^+$  442.1414, found: 442.1416.

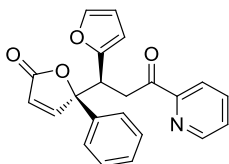

**(S)-5-((R)-1-(furan-2-yl)-3-oxo-3-(pyridin-2-yl)propyl)-5-phenylfuran-2(5H)-one (3p).** White solid; 27.4 mg, 76% yield; >99:1 dr, 99% ee;  $[\alpha]_{\text{D}}^{20} = +96.1$  (c 1.370,  $\text{CHCl}_3$ ); m.p. 131.7-132.9 °C; HPLC (AD-H, *i*-propanol/*n*-hexane = 30/70, flow rate = 1.0 mL/min,  $\lambda = 254$  nm)  $t_{\text{R}} = 11.8$  min (minor), 13.3 min (major);  $^1\text{H}$  NMR (300 MHz,  $\text{CDCl}_3$ )  $\delta$  3.15 (dd,  $J = 3.0$  Hz, 18.3 Hz, 1H), 4.17 (dd,  $J = 11.1$  Hz, 18.3 Hz, 1H), 4.44 (dd,  $J = 3.0$  Hz, 11.1 Hz, 1H), 5.83 (d,  $J = 5.7$  Hz, 1H), 6.11 (d,  $J = 3.0$  Hz, 1H), 6.17-6.19 (m, 1H), 7.24-7.26 (m, 1H), 7.29-7.48 (m, 6H), 7.69-7.73 (m, 2H), 7.85 (d,  $J = 7.8$  Hz, 1H), 8.63 (d,  $J = 4.8$  Hz, 1H);  $^{13}\text{C}$  NMR (75 MHz,  $\text{CDCl}_3$ )  $\delta$  36.7, 43.0, 92.2, 108.3, 110.5, 119.5, 121.7, 125.2, 127.2, 128.4, 128.9, 136.7, 137.5, 141.5, 148.9, 151.9, 152.7, 158.4, 172.0, 198.9; HRMS (ESI-TOF) calcd. for  $\text{C}_{22}\text{H}_{17}\text{NNaO}_4$   $[\text{M} + \text{Na}]^+$  382.1050, found: 382.1050.

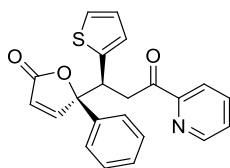

**(S)-5-((S)-3-oxo-3-(pyridin-2-yl)-1-(thiophen-2-yl)propyl)-5-phenylfuran-2(5H)-one (3q).** White solid; 31.9 mg, 85% yield; 96:4 dr, 97% ee;  $[\alpha]_{\text{D}}^{20} = +127.1$  (c 1.595,  $\text{CHCl}_3$ ); m.p. 170.1-172.2 °C; HPLC (AD-H, *i*-propanol/*n*-hexane = 30/70, flow rate = 1.0 mL/min,  $\lambda = 254$  nm)  $t_{\text{R}} = 11.7$  min (minor), 17.1 min (major);  $^1\text{H}$  NMR (300 MHz,  $\text{CDCl}_3$ )  $\delta$  3.22 (dd,  $J = 3.0$  Hz, 18.3 Hz, 1H), 4.24 (dd,  $J = 10.8$  Hz, 18.3 Hz, 1H), 4.62 (dd,  $J = 3.0$  Hz, 10.8 Hz, 1H), 5.77 (d,  $J = 5.7$  Hz, 1H), 6.83-6.85 (m, 1H), 6.93 (d,  $J = 3.0$  Hz, 1H), 7.08 (d,  $J = 5.1$  Hz, 1H), 7.27-7.41 (m, 4H), 7.52 (d,  $J = 7.2$  Hz, 2H), 7.57 (d,  $J = 5.7$  Hz, 1H), 7.67-7.73 (m, 1H), 7.80 (d,  $J = 7.8$  Hz, 1H), 8.61 (d,  $J = 4.8$  Hz, 1H);  $^{13}\text{C}$  NMR (75 MHz,  $\text{CDCl}_3$ )  $\delta$  39.6, 44.0, 92.5, 119.7, 121.7, 124.5, 125.2, 126.4, 126.8, 127.2, 128.4, 129.0, 136.6, 137.7, 140.4, 148.9, 152.6, 158.6, 172.2, 198.7; HRMS (ESI-TOF) calcd. for  $\text{C}_{22}\text{H}_{17}\text{NNaO}_3\text{S}$   $[\text{M} + \text{Na}]^+$  398.0821, found: 398.0818.

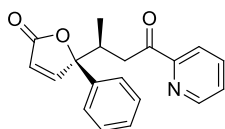

**(R)-5-((S)-4-oxo-4-(pyridin-2-yl)butan-2-yl)-5-phenylfuran-2(5H)-one (3r).** White solid; 32.2 mg, 84% yield; 97:3 dr, >99% ee;  $[\alpha]_{\text{D}}^{20} = +249.3$  (c 1.295,  $\text{CHCl}_3$ ); m.p. 151.1-151.9 °C; HPLC (OD-H, EtOH/hexane = 15/85, flow rate = 1.0 mL/min,  $\lambda = 254$  nm)  $t_{\text{R}} = 7.4$  min (major), 9.0 min (minor);  $^1\text{H}$  NMR (300 MHz,  $\text{CDCl}_3$ )  $\delta$  0.94 (d,  $J = 6.6$  Hz, 3H), 3.01 (m, 1H), 3.11-3.18 (m, 1H), 3.43 (dd,  $J = 9.9$  Hz, 18.0 Hz, 1H), 6.08 (d,  $J = 5.7$  Hz, 1H), 7.23-7.29 (m, 1H), 7.31-7.36 (m, 2H), 7.39-7.44 (m, 3H), 7.67 (d,  $J = 5.7$  Hz, 1H), 7.76 (t,  $J = 7.5$  Hz, 1H), 7.90 (d,  $J = 7.8$  Hz, 1H), 8.60 (d,  $J = 4.2$  Hz, 1H);  $^{13}\text{C}$  NMR (75 MHz,  $\text{CDCl}_3$ )  $\delta$  14.6, 36.7, 39.4, 93.9, 120.1, 121.6, 125.3, 127.1, 128.2, 128.8, 136.7, 138.4, 148.9, 153.0, 159.0, 172.4, 200.3; HRMS (ESI-TOF) calcd. for  $\text{C}_{19}\text{H}_{17}\text{NNaO}_3$   $[\text{M} + \text{Na}]^+$  330.1101, found: 330.1107.

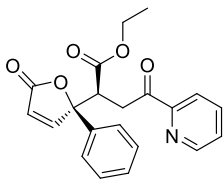

**(S)-ethyl 4-oxo-2-((S)-5-oxo-2-phenyl-2,5-dihydrofuran-2-yl)-4-(pyridin-2-yl)butanoate (3s).** White solid; 30.9 mg, 85% yield; >99:1 dr, 99% ee;  $[\alpha]_D^{20} = +123.0$  (c 1.545,  $\text{CHCl}_3$ ); m.p. 182.8-183.6 °C; HPLC (AD-H, *i*-propanol/*n*-hexane = 30/70, flow rate = 1.0 mL/min,  $\lambda = 254$  nm)  $t_R = 14.4$  min (major), 27.4 min (minor);  $^1\text{H}$  NMR (300 MHz,  $\text{CDCl}_3$ )  $\delta$  1.08 (t,  $J = 7.2$  Hz, 3H), 3.19-3.25 (m, 1H), 3.81-3.85 (m, 1H), 3.90-4.11 (m, 3H), 6.10 (d,  $J = 5.7$  Hz, 1H), 7.30-7.44 (m, 6H), 7.77 (t,  $J = 7.5$  Hz, 1H), 7.91-7.96 (m, 2H), 8.63 (d,  $J = 4.2$  Hz, 1H);  $^{13}\text{C}$  NMR (75 MHz,  $\text{CDCl}_3$ )  $\delta$  13.9, 35.9, 50.2, 61.1, 90.2, 120.0, 121.6, 125.4, 127.4, 128.7, 129.0, 136.7, 137.3, 149.0, 152.4, 158.0, 170.6, 171.2, 199.2; HRMS (ESI-TOF) calcd. for  $\text{C}_{21}\text{H}_{19}\text{NNaO}_5$   $[\text{M} + \text{Na}]^+$  388.1155, found: 388.1157.

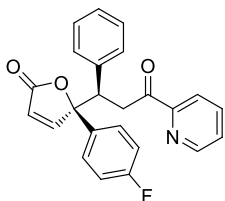

**(S)-5-(4-fluorophenyl)-5-((R)-3-oxo-1-phenyl-3-(pyridin-2-yl)propyl)furan-2(5H)-one (3t).** White solid; 32.1 mg, 83% yield; 98:2 dr, 99% ee,  $[\alpha]_D^{20} = +140.2$  (c 1.605,  $\text{CHCl}_3$ ); m.p. 80.4-81.6 °C; HPLC (AD-H, *i*-propanol/*n*-hexane = 30/70, flow rate = 1.0 mL/min,  $\lambda = 254$  nm)  $t_R = 10.8$  min (major), 11.5 min (minor);  $^1\text{H}$  NMR (300 MHz,  $\text{CDCl}_3$ )  $\delta$  3.31 (dd,  $J = 2.1$  Hz, 16.8 Hz, 1H), 4.14-4.28 (m, 2H), 5.70 (d,  $J = 5.7$  Hz, 1H), 7.00-7.06 (m, 2H), 7.14-7.27 (m, 5H), 7.37-7.42 (m, 1H), 7.44-7.49 (m, 2H), 7.50-7.52 (m, 1H), 7.66-7.72 (m, 1H), 7.77 (d,  $J = 7.8$  Hz, 1H), 8.63 (d,  $J = 4.5$  Hz, 1H);  $^{13}\text{C}$  NMR (75 MHz,  $\text{CDCl}_3$ )  $\delta$  37.8, 49.3, 92.5, 115.8 (d,  $J = 21.5$  Hz, 1C), 119.8, 121.6, 127.2, 127.4 (d,  $J = 18.4$  Hz, 1C), 128.4, 128.9, 134.0 (d,  $J = 3.1$  Hz, 1C), 136.6, 137.7, 148.8, 152.7, 158.6, 162.4 (d,  $J = 246.4$  Hz, 1C), 171.9, 199.1; HRMS (ESI-TOF) calcd. for  $\text{C}_{24}\text{H}_{18}\text{FNNaO}_3$   $[\text{M} + \text{Na}]^+$  410.1163, found: 410.1170.

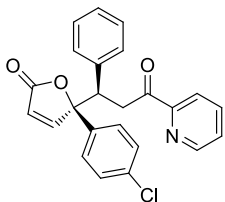

**(S)-5-(4-chlorophenyl)-5-((R)-3-oxo-1-phenyl-3-(pyridin-2-yl)propyl)furan-2(5H)-one (3u).** White solid; 34.7 mg, 86% yield; 98:2 dr, 99% ee;  $[\alpha]_D^{20} = +143.6$  (c 1.735,  $\text{CHCl}_3$ ); m.p. 145.1-147.2 °C; HPLC (AD-H, *i*-propanol/*n*-hexane = 30/70, flow rate = 1.0 mL/min,  $\lambda = 254$  nm)  $t_R = 15.0$  min (minor), 17.0 min (major).  $^1\text{H}$  NMR (300 MHz,  $\text{CDCl}_3$ )  $\delta$  3.30 (dd,  $J = 1.8$  Hz, 16.2 Hz, 1H), 4.14-4.28 (m, 2H), 5.70 (d,  $J = 5.7$  Hz, 1H), 7.16-7.29 (m, 5H), 7.30-7.33 (m, 2H), 7.38-7.45 (m, 3H), 7.49 (d,  $J = 5.7$  Hz, 1H), 7.67-7.78 (m, 2H), 8.63 (d,  $J = 4.2$  Hz, 1H);  $^{13}\text{C}$  NMR (75 MHz,  $\text{CDCl}_3$ )  $\delta$  37.8, 49.2, 92.4, 119.9, 121.7, 126.8, 127.2, 127.6, 128.5, 128.9, 129.0, 134.3, 136.6, 136.7, 137.6, 148.8, 152.7, 158.4, 171.7, 199.1; HRMS (ESI-TOF) calcd. for  $\text{C}_{24}\text{H}_{18}\text{ClNNaO}_3$   $[\text{M} + \text{Na}]^+$  426.0867, found: 426.0872.

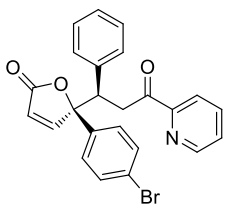

**(S)-5-(4-bromophenyl)-5-((R)-3-oxo-1-phenyl-3-(pyridin-2-yl)propyl)furan-2(5H)-one (3v).** White solid; 34.5 mg, 77% yield; 97:3 dr, 98% ee;  $[\alpha]_D^{20} = +135.8$  (c 1.725,  $\text{CHCl}_3$ ); m.p. 155.4-157.1 °C; HPLC (Chiralpak AD-H, *i*-propanol/*n*-hexane = 30/70, flow rate = 1.0 mL/min,  $\lambda = 254$  nm)  $t_R = 17.1$  min (minor), 24.0 min (major).  $^1\text{H}$  NMR (300 MHz,  $\text{CDCl}_3$ )  $\delta$  3.30 (dd,  $J = 1.8$  Hz, 16.2 Hz, 1H), 4.14-4.27 (m, 2H), 5.69 (d,  $J = 5.7$  Hz, 1H), 7.14-7.29 (m, 5H), 7.35-7.43 (m, 3H), 7.46-7.49 (m, 3H), 7.67-7.78 (m, 2H), 8.62-8.64 (m, 1H);  $^{13}\text{C}$  NMR (75 MHz,  $\text{CDCl}_3$ )  $\delta$  37.8, 49.1, 92.5, 119.9, 121.7, 122.5, 127.1, 127.2, 127.6, 128.5, 128.9, 132.0, 136.6, 137.2, 137.6, 148.8, 152.7, 158.4,

171.7, 199.1; HRMS (ESI-TOF) calcd. for  $C_{24}H_{18}BrNNaO_3$   $[M + Na]^+$  470.0362, found: 470.0369.

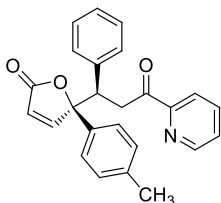

**(S)-5-((R)-3-oxo-1-phenyl-3-(pyridin-2-yl)propyl)-5-(p-tolyl)furan-2(5H)-one (3w).** White solid; 30.9 mg, 81% yield; 98:2 dr, 99% ee;  $[\alpha]_D^{20} = +147.5$  (c 1.545,  $CHCl_3$ ); m.p. 159.1-160.8 °C; HPLC (Chiralpak AD-H, *i*-propanol/*n*-hexane = 30/70, flow rate = 1.0 mL/min,  $\lambda = 254$  nm)  $t_R = 12.2$  min (minor), 23.9 min (major).  $^1H$  NMR (300 MHz,  $CDCl_3$ )  $\delta$  2.31 (s, 3H), 3.20-3.31 (m, 1H), 4.24-4.34 (m, 2H), 5.64 (d,  $J = 5.7$  Hz, 1H), 7.13-7.24 (m, 5H), 7.28-7.31 (m, 2H), 7.36-7.41 (m, 3H), 7.49 (d,  $J = 5.7$  Hz, 1H), 7.65-7.71 (m, 1H), 7.75 (d,  $J = 7.8$  Hz, 1H), 8.62 (d,  $J = 4.5$  Hz, 1H);  $^{13}C$  NMR (75 MHz,  $CDCl_3$ )  $\delta$  20.9, 37.9, 49.1, 93.0, 119.3, 121.6, 125.2, 127.1, 127.4, 128.4, 128.9, 129.5, 135.1, 136.5, 138.0, 138.1, 148.8, 152.8, 159.3, 172.3, 199.3; HRMS (ESI-TOF) calcd. for  $C_{25}H_{21}NNaO_3$   $[M + Na]^+$  406.1414, found: 406.1415.

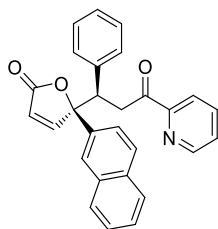

**(S)-5-(naphthalen-2-yl)-5-((R)-3-oxo-1-phenyl-3-(pyridin-2-yl)propyl)furan-2(5H)-one (3x).** White solid; 35.7 mg, 85% yield; 97:3 dr, 99% ee;  $[\alpha]_D^{20} = +154.5$  (c 1.785,  $CHCl_3$ ); m.p. 206.9-207.8 °C; HPLC (Chiralpak AD-H, *i*-propanol/*n*-hexane = 30/70, flow rate = 1.0 mL/min,  $\lambda = 254$  nm)  $t_R = 14.9$  min (minor), 34.7 min (major);  $^1H$  NMR (300 MHz,  $CDCl_3$ )  $\delta$  3.37 (dd,  $J = 3.6$  Hz, 18.0 Hz, 1H), 4.26 (dd,  $J = 10.2$  Hz, 18.0 Hz, 1H), 4.43 (dd,  $J = 3.6$  Hz, 10.2 Hz, 1H), 5.69 (d,  $J = 5.7$  Hz, 1H), 7.16-7.28 (m, 3H), 7.30-7.38 (m, 3H), 7.46-7.51 (m, 2H), 7.56-7.66 (m, 4H), 7.79-7.82 (m, 2H), 7.87 (d,  $J = 8.7$  Hz, 1H), 8.01 (d,  $J = 1.5$  Hz, 1H), 8.58 (d,  $J = 4.5$  Hz, 1H);  $^{13}C$  NMR (75 MHz,  $CDCl_3$ )  $\delta$  37.9, 49.1, 93.1, 119.6, 121.5, 122.8, 124.6, 126.5, 126.6, 127.0, 127.5, 128.2, 128.4, 128.8, 128.9, 132.8, 133.1, 135.4, 136.5, 137.9, 148.7, 152.7, 159.0, 172.2, 199.2; HRMS (ESI-TOF) calcd. for  $C_{28}H_{21}NNaO_3$   $[M + Na]^+$  442.1414, found: 442.1406.

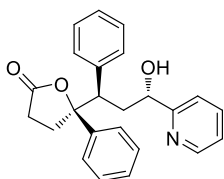

**(S)-5-((1R,3S)-3-hydroxy-1-phenyl-3-(pyridin-2-yl)propyl)-5-phenyl dihydrofuran-2(3H)-one (4).** White solid; 16.5 mg, 23% yield, >99% ee;  $[\alpha]_D^{20} = +14.0$  (c,  $CHCl_3$ ); m.p. 92.4-94.3 °C; HPLC (OD-H, *i*-propanol/*n*-hexane = 15/85, flow rate = 1.0 mL/min,  $\lambda = 254$  nm)  $t_R = 12.0$  min (minor), 15.2 min (major);  $^1H$  NMR (300 MHz,  $CDCl_3$ )  $\delta$  1.47-1.56 (m, 1H), 1.56-1.67 (m, 1H), 2.03-2.32 (m, 3H), 2.42-2.52 (m, 1H), 3.69 (dd,  $J = 2.7$  Hz, 12.3 Hz, 1H), 4.10-4.18 (m, 2H), 6.98 (d,  $J = 7.8$  Hz, 1H), 7.10 (dd,  $J = 5.1$  Hz, 7.2 Hz, 1H), 7.24-7.44 (m, 8H), 7.48-7.51 (m, 2H), 7.54-7.60 (m, 1H), 8.38 (d,  $J = 4.8$  Hz, 1H);  $^{13}C$  NMR (75 MHz,  $CDCl_3$ )  $\delta$  28.2, 34.3, 39.5, 52.4, 69.5, 91.1, 120.0, 122.2, 124.6, 127.4, 127.6, 128.6, 128.9, 130.2, 136.6, 138.5, 143.8, 147.8, 161.6, 177.0; HRMS (EI) calcd. for  $C_{24}H_{19}NNaO_4$   $[M]^+$  373.1678, found: 373.1670.

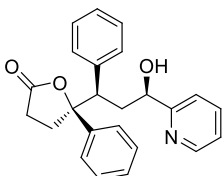

**(S)-5-((1R,3R)-3-hydroxy-1-phenyl-3-(pyridin-2-yl)propyl)-5-phenyl dihydrofuran-2(3H)-one (4').** White solid; 32.3 mg, 44% yield, >99% ee;  $[\alpha]_D^{20} = +3.8$  (c,  $CHCl_3$ ); m.p. 129.6-131.1 °C; HPLC (OD-H, *i*-propanol/*n*-hexane = 15/85, flow rate = 1.0 mL/min,  $\lambda = 254$  nm)  $t_R =$

8.3 min (major), 12.1 min (minor);  $^1\text{H}$  NMR (300 MHz,  $\text{CDCl}_3$ )  $\delta$  1.47-1.65 (m, 1H), 2.07-2.37 (m, 5H), 3.12 (dd,  $J = 3.6$  Hz, 8.7 Hz, 1H), 3.60 (br s, 1H), 4.12 (t,  $J = 6.3$  Hz, 1H), 6.76 (d,  $J = 7.8$  Hz, 1H), 7.04-7.09 (m, 1H), 7.17-7.38 (m, 10H), 7.44-7.50 (m, 1H), 8.35 (d,  $J = 4.8$  Hz, 1H);  $^{13}\text{C}$  NMR (75 MHz,  $\text{CDCl}_3$ )  $\delta$  28.3, 33.8, 39.2, 51.5, 71.5, 90.9, 120.9, 122.3, 124.9, 127.2, 127.6, 128.5, 130.0, 136.2, 139.3, 143.4, 148.3, 160.9, 176.7; HRMS (EI) calcd. for  $\text{C}_{24}\text{H}_{19}\text{NNaO}_4$   $[\text{M}]^+$  373.1678, found: 373.1685.

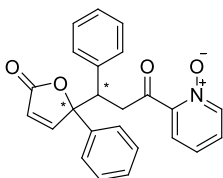

**2-(3-(5-oxo-2-phenyl-2,5-dihydrofuran-2-yl)-3-phenylpropanoyl)pyridine 1-oxide (8).**

White solid; 25.7 mg, 67% yield, 99:1 dr, 90% ee;  $[\alpha]_{\text{D}}^{20} = +105.4$  (c 1.000,  $\text{CHCl}_3$ ); m.p. 155.5-157.1  $^{\circ}\text{C}$ ; HPLC (AD-H, *i*-propanol/*n*-hexane = 30/70, flow rate = 1.0 mL/min,  $\lambda = 254$  nm)  $t_{\text{R}} = 13.8$  min (major), 20.2 min (minor);  $^1\text{H}$  NMR (300 MHz,  $\text{CDCl}_3$ )  $\delta$  3.43 (dd,  $J = 4.2$  Hz, 17.7 Hz, 1H), 3.98 (dd,  $J = 10.2$  Hz, 17.7 Hz, 1H), 4.22 (dd,  $J = 4.2$  Hz, 10.2 Hz, 1H), 5.67 (d,  $J = 5.7$  Hz, 1H), 7.00-7.11 (m, 2H), 7.12-7.29 (m, 6H), 7.30-7.41 (m, 3H), 7.45-7.50 (m, 3H), 8.09 (d,  $J = 6.6$  Hz, 1H);  $^{13}\text{C}$  NMR (75 MHz,  $\text{CDCl}_3$ )  $\delta$  43.4, 49.4, 92.5, 119.8, 125.1, 125.4, 126.6, 127.6, 127.7, 128.4, 128.9, 137.5, 137.8, 140.2, 158.6, 171.8, 195.8; HRMS (ESI-TOF) calcd. for  $\text{C}_{24}\text{H}_{19}\text{NNaO}_4$   $[\text{M} + \text{Na}]^+$  408.1206, found: 408.1211.

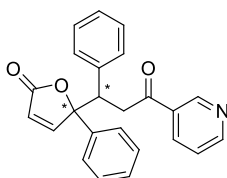

**5-(3-oxo-1-phenyl-3-(pyridin-3-yl)propyl)-5-phenylfuran-2(5H)-one (10).**

White solid; 16.4 mg, 44% yield, 96:4 dr, 92% ee;  $[\alpha]_{\text{D}}^{20} = +111.7$  (c 0.820,  $\text{CHCl}_3$ ); m.p. 184.2-185.7  $^{\circ}\text{C}$ ; HPLC (AD-H, *i*-propanol/*n*-hexane = 25/75, flow rate = 1.0 mL/min,  $\lambda = 254$  nm)  $t_{\text{R}} = 15.1$  min (major), 31.7 min (minor);  $^1\text{H}$  NMR (400 MHz,  $\text{CDCl}_3$ )  $\delta$  3.18 (dd,  $J = 3.3$  Hz, 17.8 Hz, 1H), 3.82 (dd,  $J = 10.1$  Hz, 17.8 Hz, 1H), 4.31 (dd,  $J = 3.2$  Hz, 10.1 Hz, 1H), 5.65 (d,  $J = 5.6$  Hz, 1H), 7.16-7.38 (m, 7H), 7.39-7.47 (m, 2H), 7.50 (d,  $J = 5.6$  Hz, 1H), 7.52-7.62 (m, 2H), 7.96-8.08 (m, 1H), 8.71 (d,  $J = 4.8$  Hz, 1H), 8.99 (s, 1H);  $^{13}\text{C}$  NMR (101 MHz,  $\text{CDCl}_3$ )  $\delta$  29.7, 39.3, 48.9, 76.8, 92.7, 119.4, 123.5, 125.1, 127.8, 128.6, 128.6, 128.7, 129.2, 131.8, 135.2, 137.5, 137.9, 149.4, 153.5, 159.2, 172.1, 196.3; HRMS (ESI-TOF) calcd. for  $\text{C}_{24}\text{H}_{19}\text{NNaO}_3$   $[\text{M} + \text{Na}]^+$  392.1257, found: 392.1253.

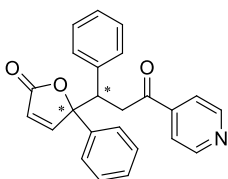

**5-(3-oxo-1-phenyl-3-(pyridin-4-yl)propyl)-5-phenylfuran-2(5H)-one (12).**

White solid; 22.5 mg, 61% yield, 99:1 dr, 93% ee;  $[\alpha]_{\text{D}}^{20} = +134.2$  (c 1.125,  $\text{CHCl}_3$ ); m.p. 186.8-188.1  $^{\circ}\text{C}$ ; HPLC (AD-H, *i*-propanol/*n*-hexane = 30/70, flow rate = 1.0 mL/min,  $\lambda = 254$  nm)  $t_{\text{R}} = 9.2$  min (minor), 9.9 min (major);  $^1\text{H}$  NMR (400 MHz,  $\text{CDCl}_3$ )  $\delta$  3.17 (dd,  $J = 3.2$  Hz, 17.9 Hz, 1H), 3.81 (dd,  $J = 10.0$  Hz, 18.0 Hz, 1H), 4.28 (dd,  $J = 3.3$  Hz, 10.1 Hz, 1H), 5.66 (d,  $J = 5.6$  Hz, 1H), 7.19-7.25 (m, 1H), 7.27-7.37 (m, 5H), 7.39-7.45 (m, 2H), 7.49 (d,  $J = 5.6$  Hz, 1H), 7.50-7.55 (m, 3H), 7.56 (d,  $J = 1.7$  Hz, 1H), 8.72 (d,  $J = 5.3$  Hz, 2H);  $^{13}\text{C}$  NMR (101 MHz,  $\text{CDCl}_3$ )  $\delta$  39.4, 48.9, 76.7, 92.7, 119.4, 120.8, 125.1, 127.9, 128.6, 128.6, 128.8, 129.2, 137.4, 137.8, 142.3, 150.8, 159.1, 172.0, 197.0; HRMS (ESI-TOF) calcd. for  $\text{C}_{24}\text{H}_{19}\text{NNaO}_3$   $[\text{M} + \text{Na}]^+$  392.1257, found: 392.1247.

#### 4. X-ray crystallography of compound **3q**

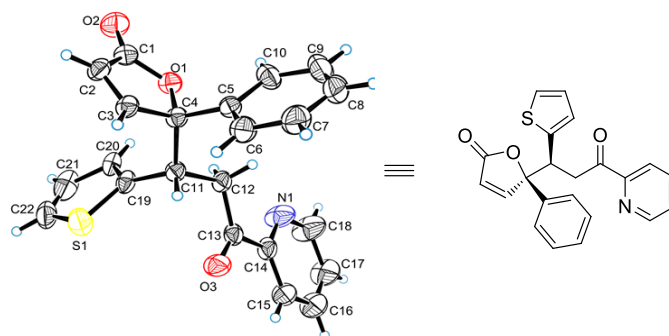

Table 1 Crystal data and structure refinement for **3q** (CCDC. 1057095).

|                                        |                                                               |
|----------------------------------------|---------------------------------------------------------------|
| Identification code                    | <b>3q</b>                                                     |
| Empirical formula                      | C <sub>22</sub> H <sub>17</sub> NO <sub>3</sub> S             |
| Formula weight                         | 375.30                                                        |
| Temperature/K                          | 290(2)                                                        |
| Crystal system                         | monoclinic                                                    |
| Space group                            | C2                                                            |
| a/Å                                    | 20.9821(9)                                                    |
| b/Å                                    | 6.4380(3)                                                     |
| c/Å                                    | 15.2420(5)                                                    |
| $\alpha$ /°                            | 90                                                            |
| $\beta$ /°                             | 111.466(3)                                                    |
| $\gamma$ /°                            | 90                                                            |
| Volume/Å <sup>3</sup>                  | 1916.11(14)                                                   |
| Z                                      | 4                                                             |
| $\rho_{\text{calc}}/\text{cm}^3$       | 1.301                                                         |
| $\mu/\text{mm}^{-1}$                   | 1.679                                                         |
| F(000)                                 | 784.0                                                         |
| Crystal size/mm <sup>3</sup>           | 0.390 × 0.380 × 0.310                                         |
| Radiation                              | CuK $\alpha$ ( $\lambda$ = 1.54184)                           |
| 2 $\theta$ range for data collection/° | 9.058 to 139.4                                                |
| Index ranges                           | -25 ≤ h ≤ 25, -7 ≤ k ≤ 7, -18 ≤ l ≤ 18                        |
| Reflections collected                  | 12444                                                         |
| Independent reflections                | 3429 [R <sub>int</sub> = 0.0415, R <sub>sigma</sub> = 0.0299] |
| Data/restraints/parameters             | 3429/7/244                                                    |
| Goodness-of-fit on F <sup>2</sup>      | 1.089                                                         |
| Final R indexes [I ≥ 2 $\sigma$ (I)]   | R <sub>1</sub> = 0.0788, wR <sub>2</sub> = 0.2317             |
| Final R indexes [all data]             | R <sub>1</sub> = 0.0802, wR <sub>2</sub> = 0.2342             |

|                                             |            |
|---------------------------------------------|------------|
| Largest diff. peak/hole / e Å <sup>-3</sup> | 0.99/-0.55 |
| Flack parameter                             | 0.066(58)  |

5.  $^1\text{H}$ ,  $^{13}\text{C}$  NMR, and HPLC spectra for compounds 3a-x, and compounds 4, 4', 8, 10 and 12.

$^1\text{H}$  NMR,  $^{13}\text{C}$  NMR and HPLC of 3a

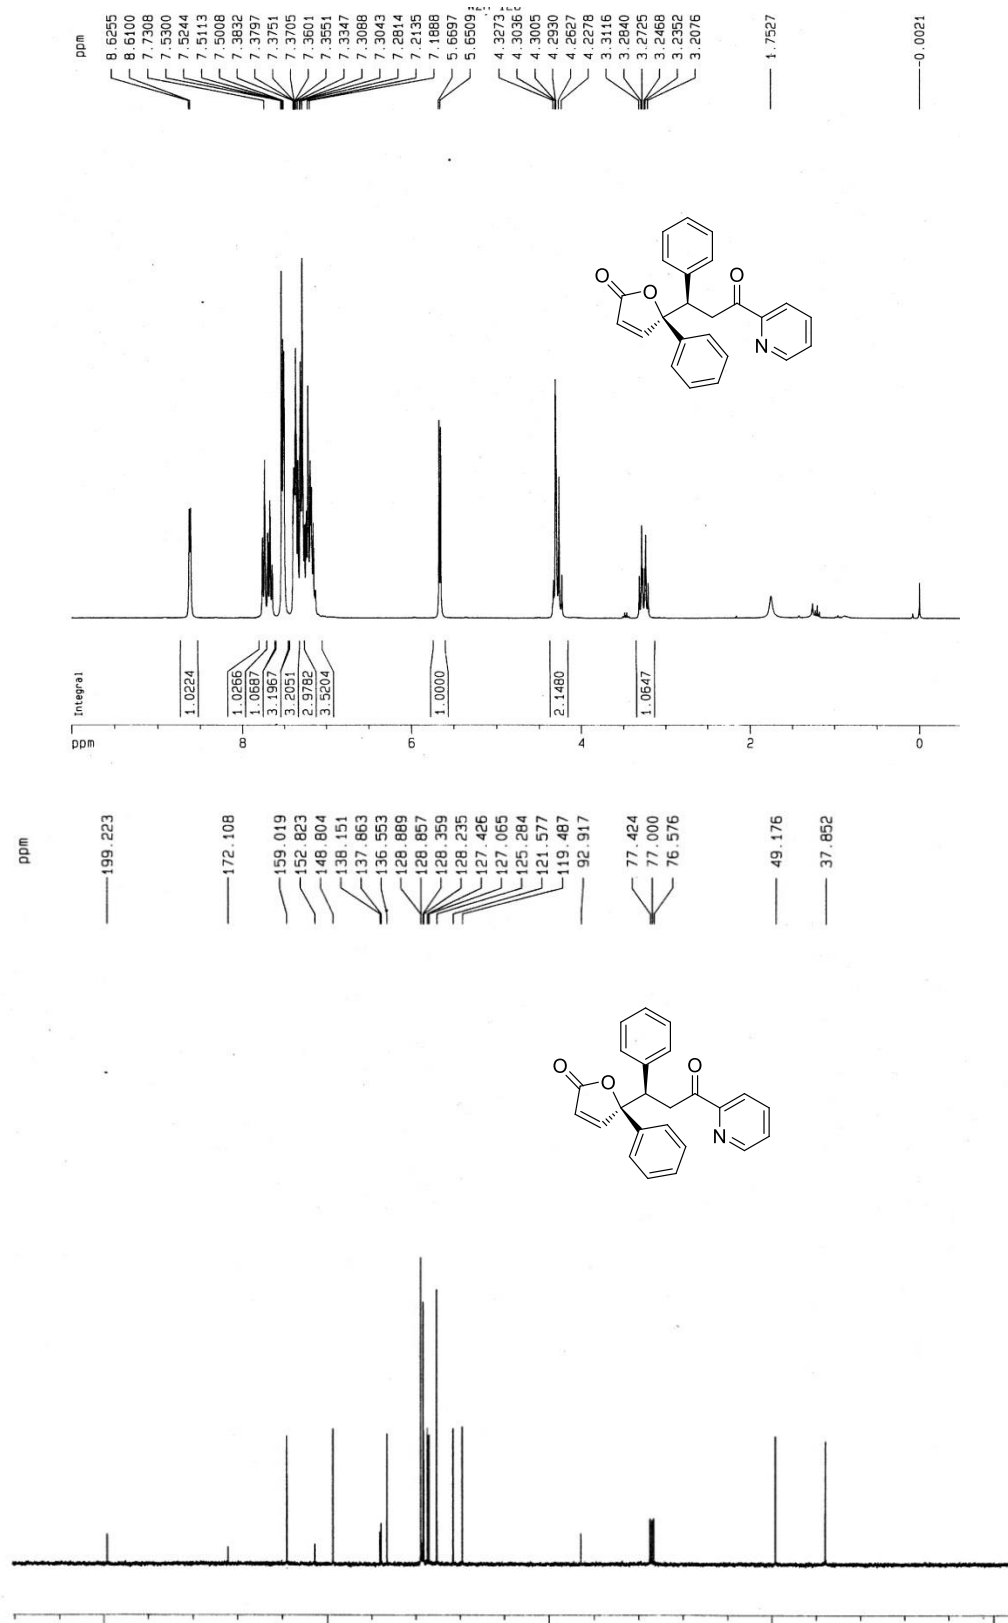

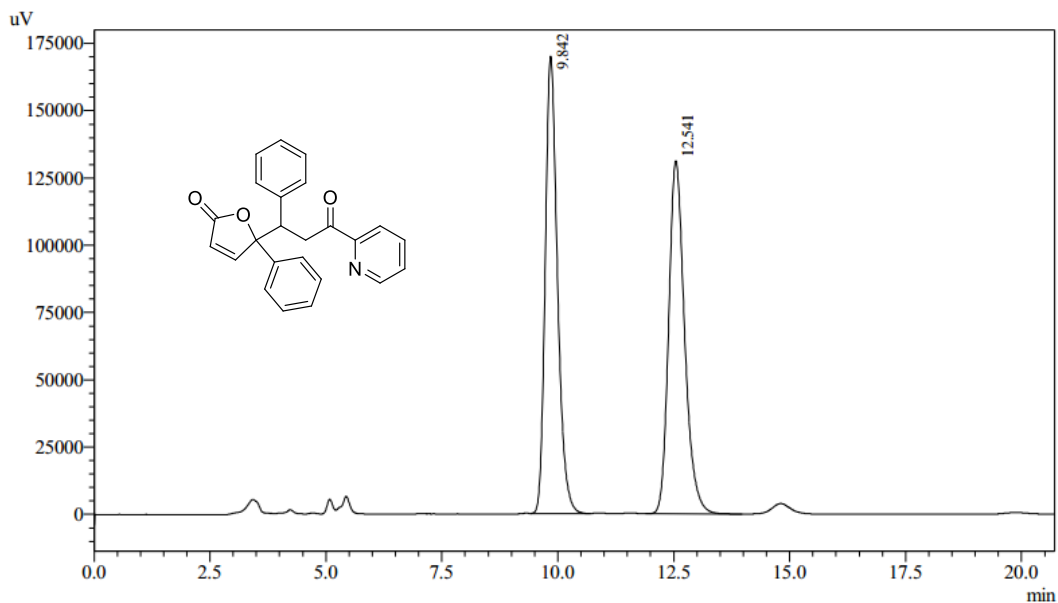

1 Det.A Ch1 / 254nm

Detector A Ch1 254nm

| Peak# | Ret. Time | Area    | Height | Area %  | Height % |
|-------|-----------|---------|--------|---------|----------|
| 1     | 9.842     | 3109179 | 169872 | 49.789  | 56.428   |
| 2     | 12.541    | 3135473 | 131168 | 50.211  | 43.572   |
| Total |           | 6244652 | 301040 | 100.000 | 100.000  |

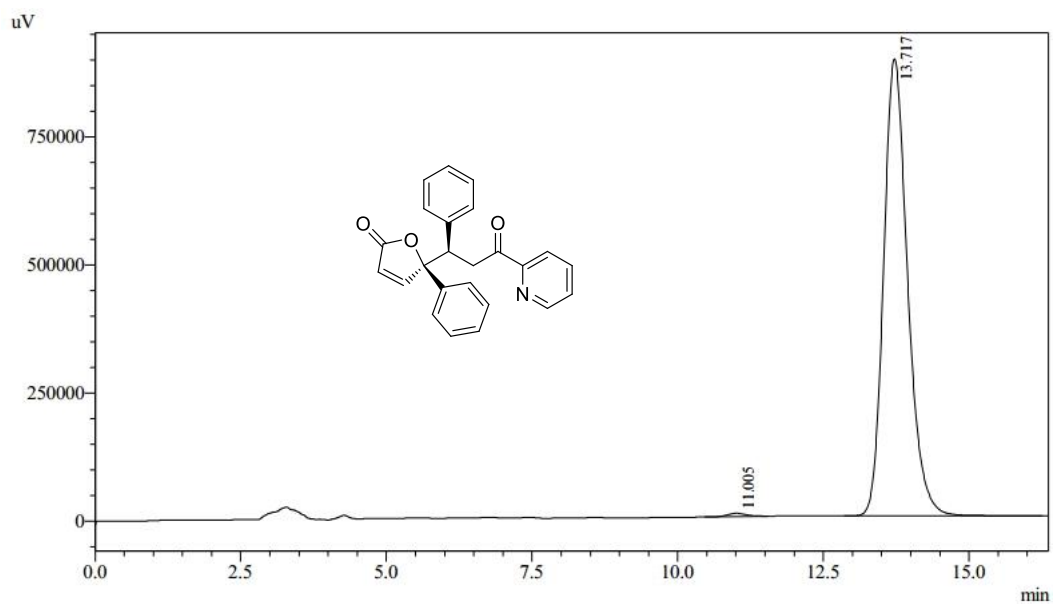

1 Det.A Ch1 / 220nm

Detector A Ch1 220nm

| Peak# | Ret. Time | Area     | Height | Area %  | Height % |
|-------|-----------|----------|--------|---------|----------|
| 1     | 11.005    | 140283   | 6387   | 0.548   | 0.712    |
| 2     | 13.717    | 25451536 | 891182 | 99.452  | 99.288   |
| Total |           | 25591819 | 897569 | 100.000 | 100.000  |



# <sup>1</sup>H NMR, <sup>13</sup>C NMR and HPLC of 3b

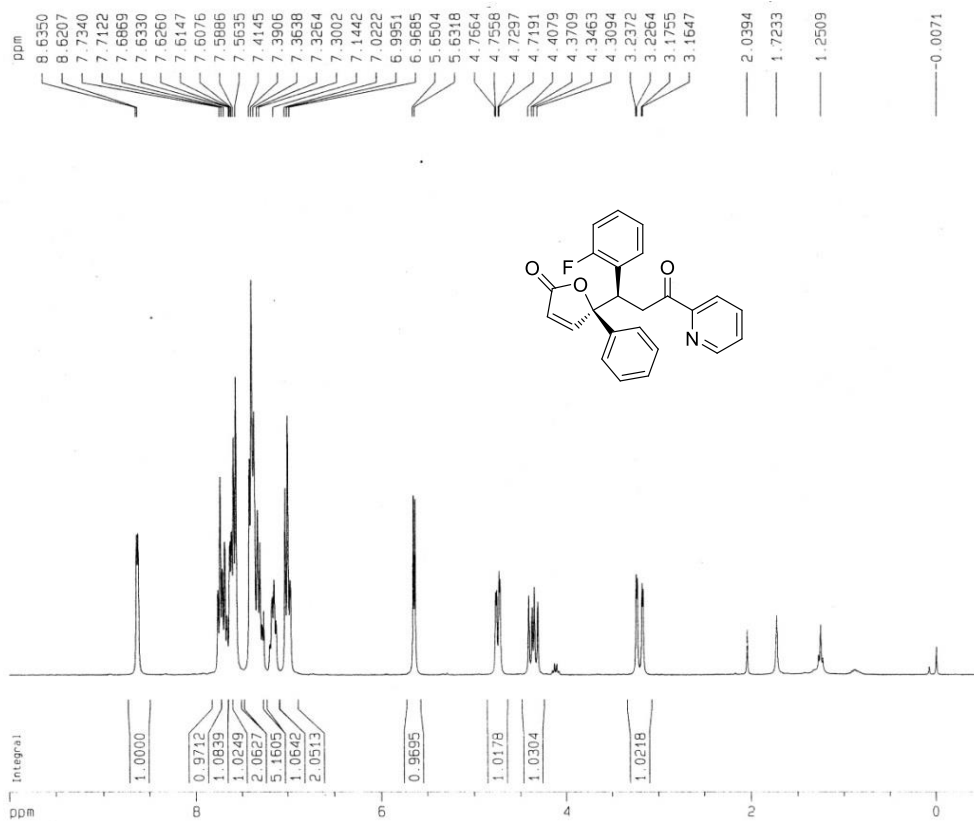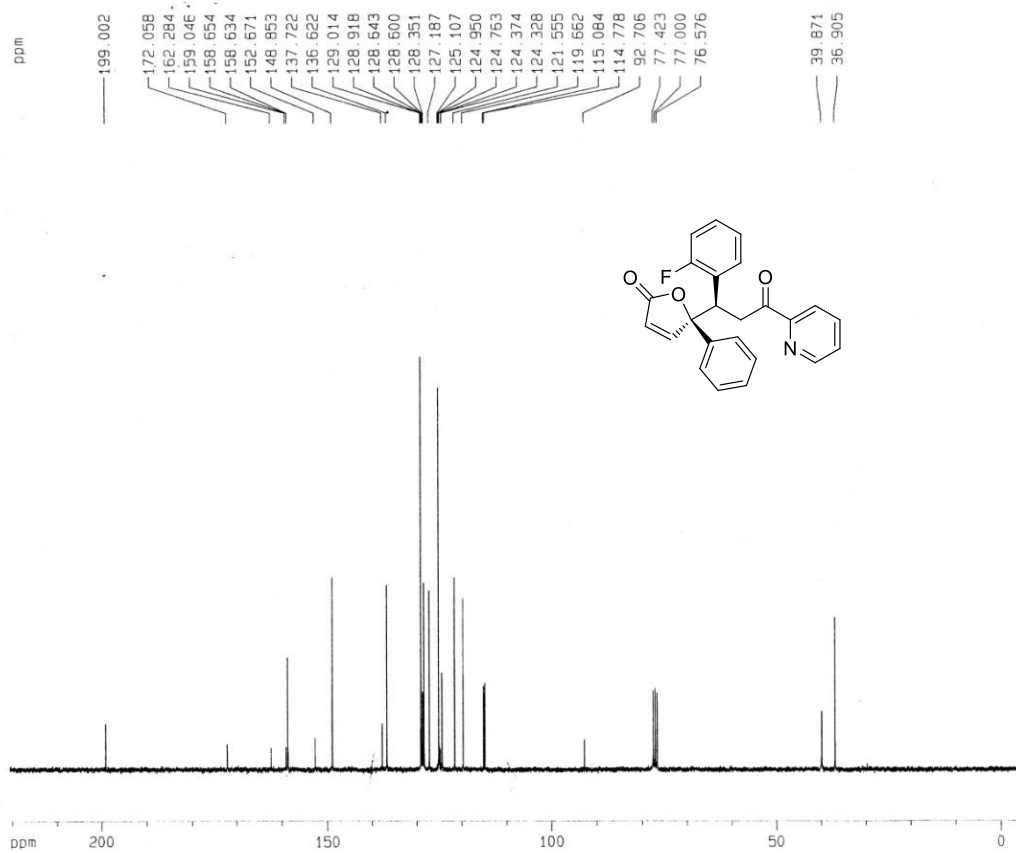

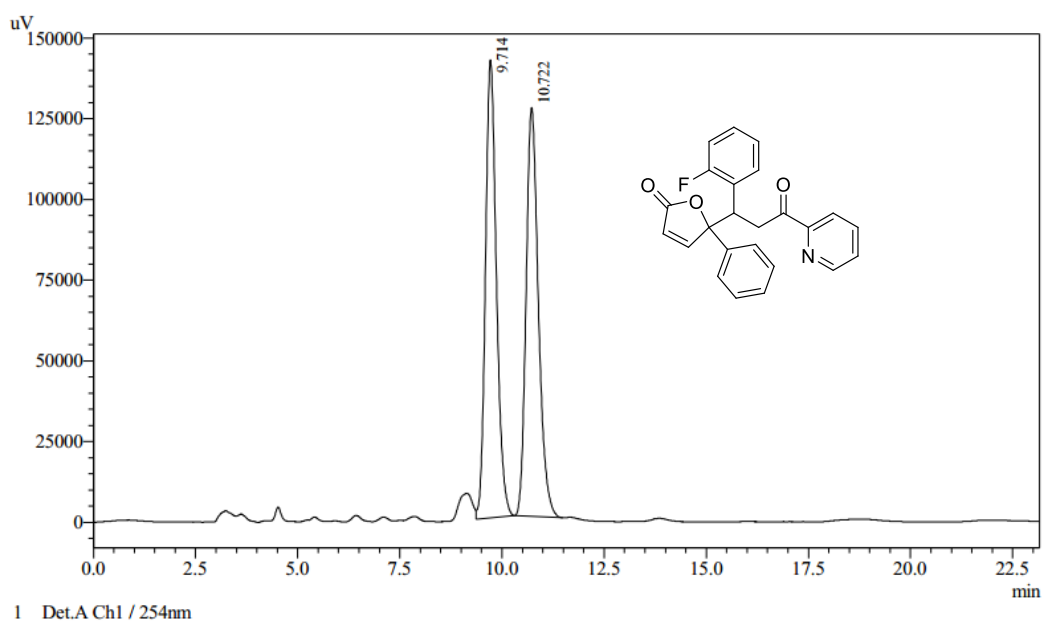

1 Det.A Ch1 / 254nm

Detector A Ch1 254nm

| Peak# | Ret. Time | Area    | Height | Area %  | Height % |
|-------|-----------|---------|--------|---------|----------|
| 1     | 9.714     | 2640093 | 141874 | 49.909  | 52.829   |
| 2     | 10.722    | 2649699 | 126682 | 50.091  | 47.171   |
| Total |           | 5289792 | 268556 | 100.000 | 100.000  |

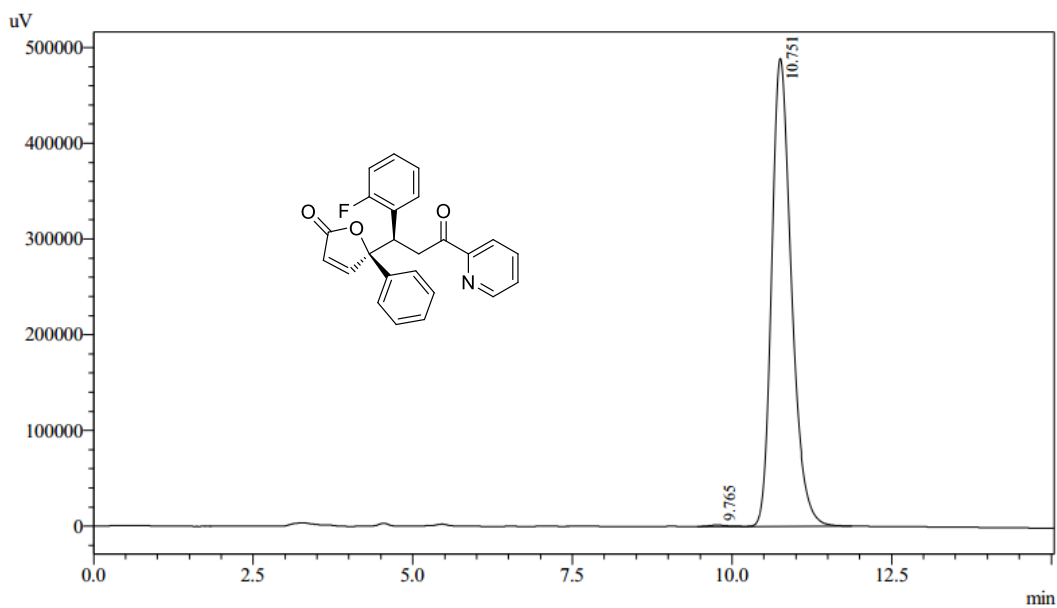

1 Det.A Ch1 / 254nm

Detector A Ch1 254nm

| Peak# | Ret. Time | Area     | Height | Area %  | Height % |
|-------|-----------|----------|--------|---------|----------|
| 1     | 9.765     | 26124    | 1427   | 0.249   | 0.291    |
| 2     | 10.751    | 10468915 | 488744 | 99.751  | 99.709   |
| Total |           | 10495039 | 490171 | 100.000 | 100.000  |

# <sup>1</sup>H NMR, <sup>13</sup>C NMR and HPLC of 3c

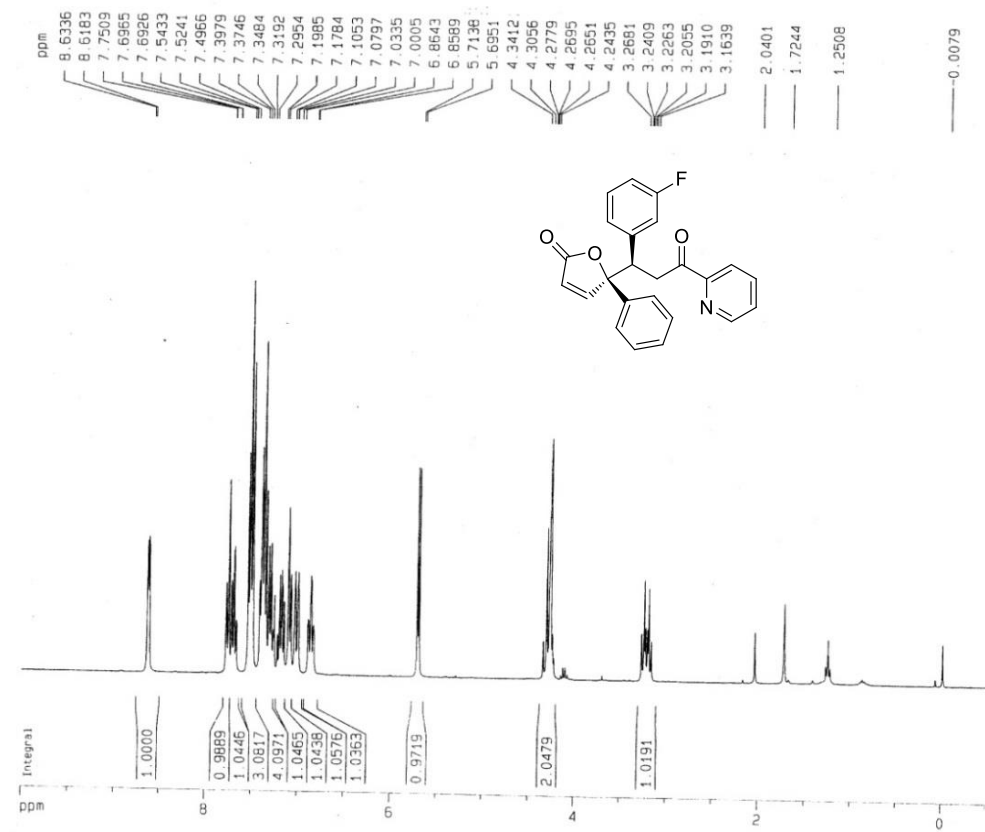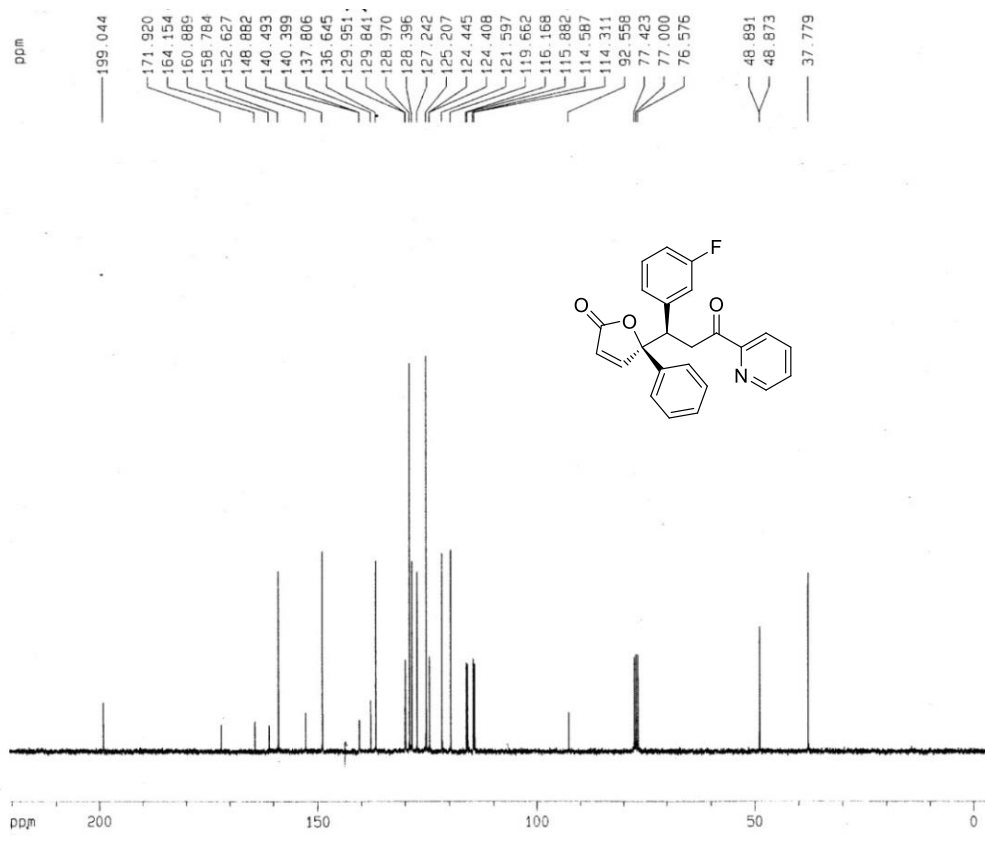

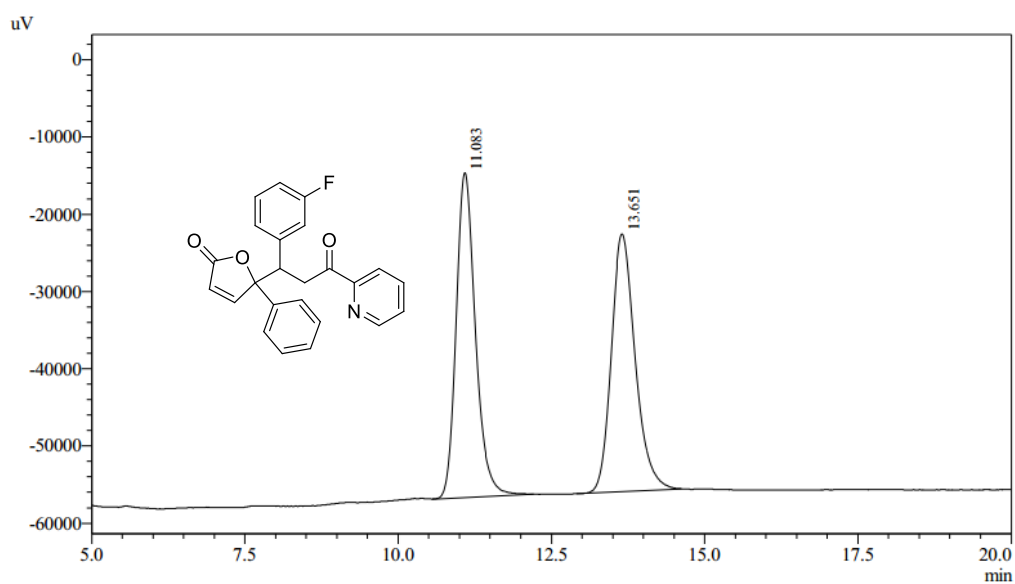

1 Det.A Ch1 / 254nm

Detector A Ch1 254nm

| Peak# | Ret. Time | Area    | Height | Area %  | Height % |
|-------|-----------|---------|--------|---------|----------|
| 1     | 11.083    | 915573  | 42072  | 50.186  | 55.770   |
| 2     | 13.651    | 908777  | 33367  | 49.814  | 44.230   |
| Total |           | 1824350 | 75439  | 100.000 | 100.000  |

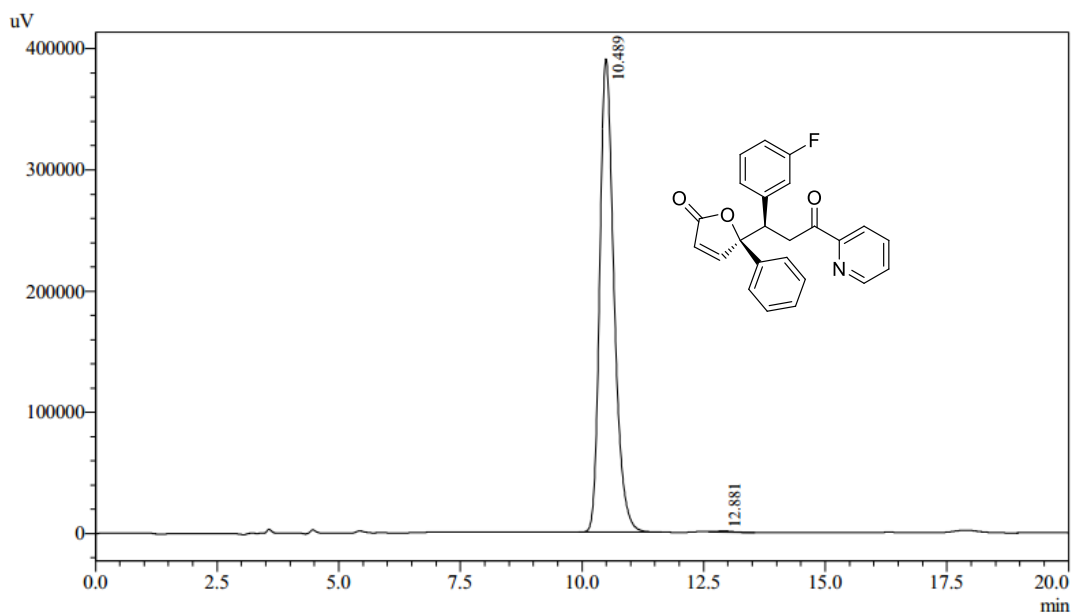

1 Det.A Ch1 / 254nm

Detector A Ch1 254nm

| Peak# | Ret. Time | Area    | Height | Area %  | Height % |
|-------|-----------|---------|--------|---------|----------|
| 1     | 10.489    | 7968127 | 390640 | 99.654  | 99.723   |
| 2     | 12.881    | 27648   | 1084   | 0.346   | 0.277    |
| Total |           | 7995776 | 391724 | 100.000 | 100.000  |

<sup>1</sup>H NMR, <sup>13</sup>C NMR and HPLC 3d

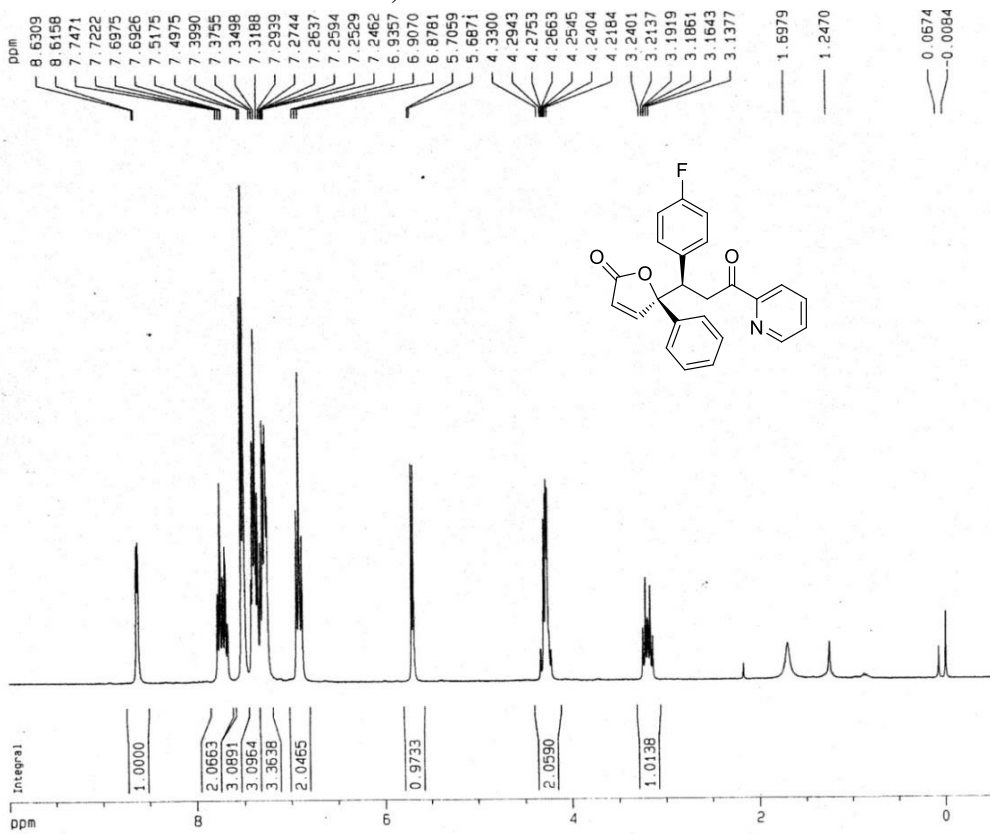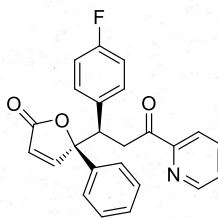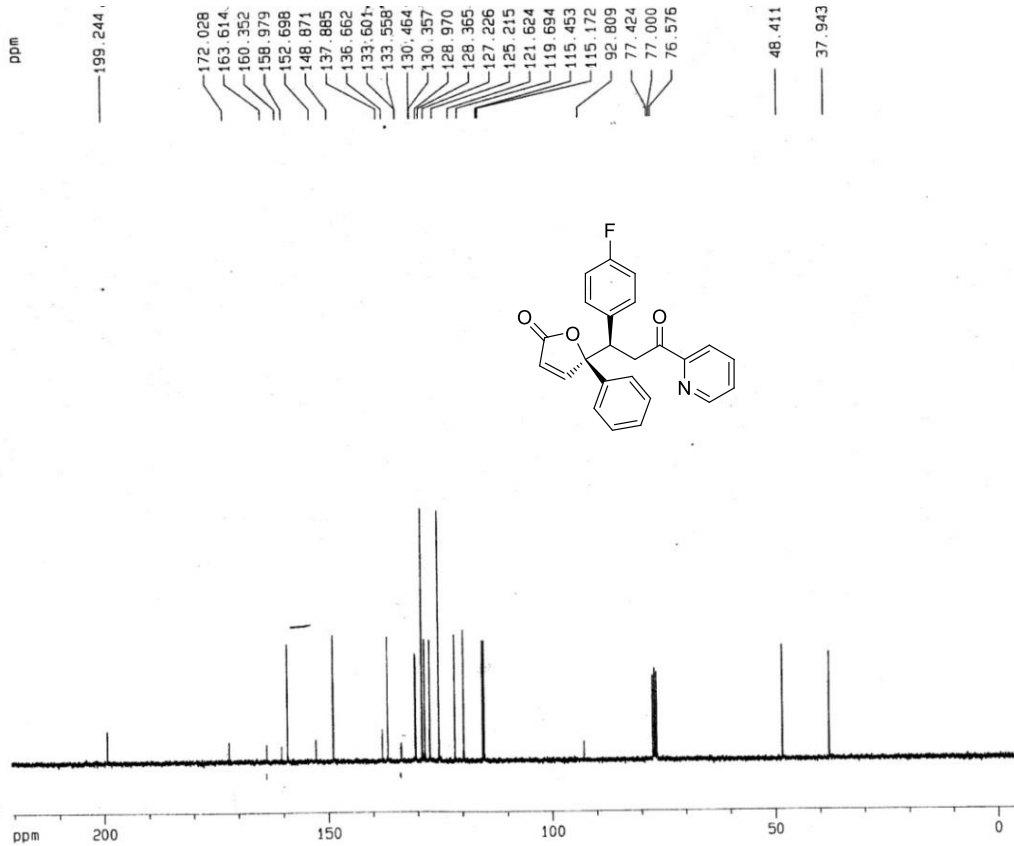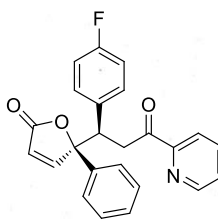

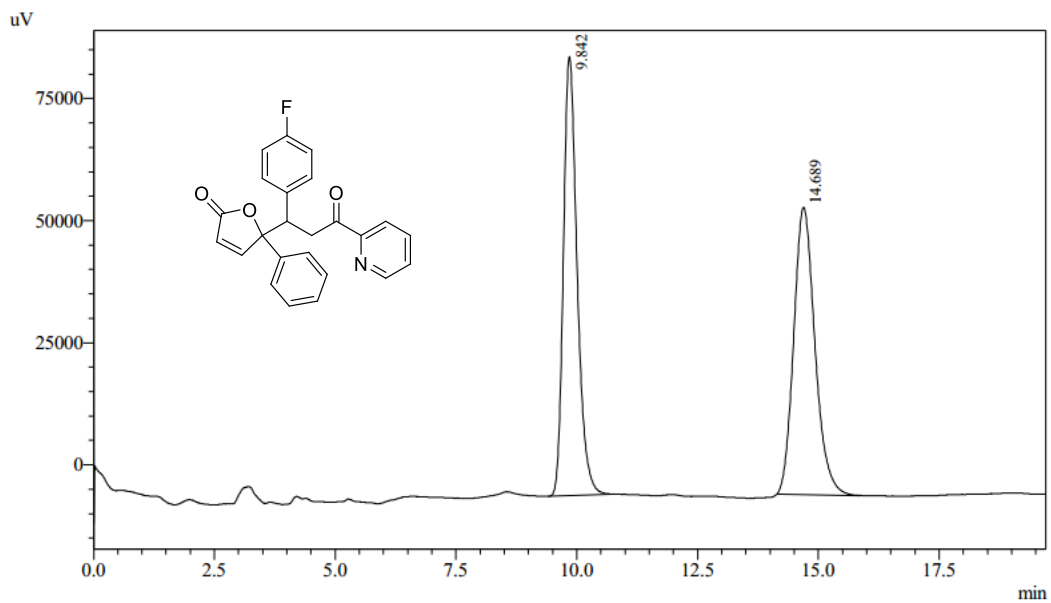

1 Det.A Ch1 / 254nm

Detector A Ch1 254nm

| Peak# | Ret. Time | Area    | Height | Area %  | Height % |
|-------|-----------|---------|--------|---------|----------|
| 1     | 9.842     | 1771883 | 89911  | 49.688  | 60.458   |
| 2     | 14.689    | 1794124 | 58806  | 50.312  | 39.542   |
| Total |           | 3566007 | 148717 | 100.000 | 100.000  |

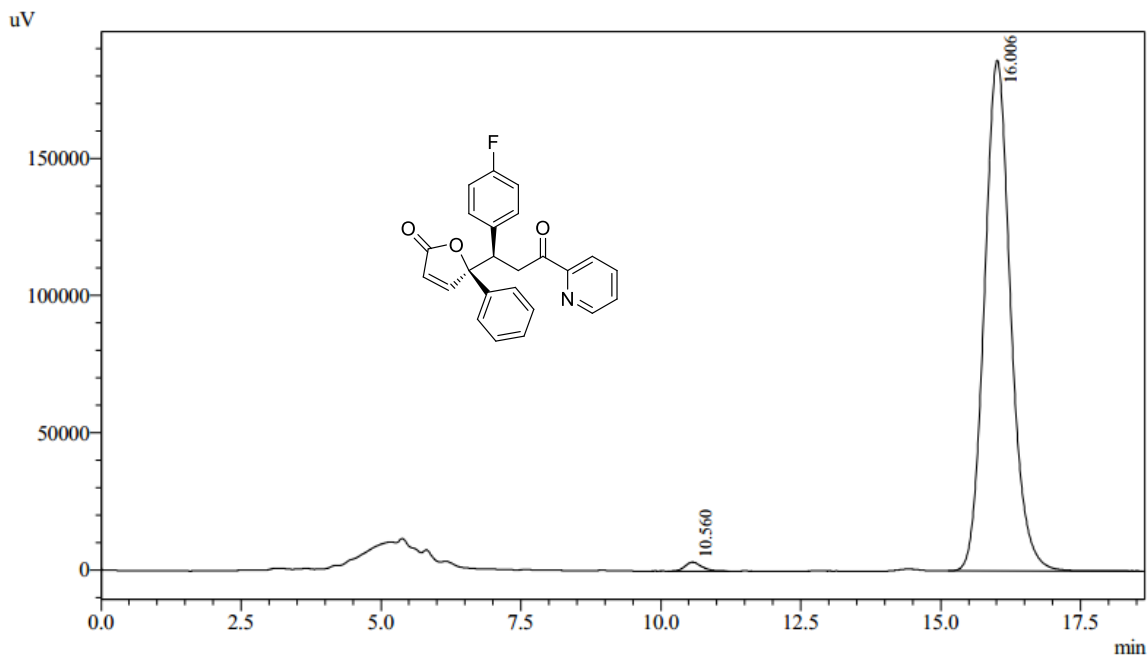

1 Det.A Ch1 / 254nm

Detector A Ch1 254nm

| Peak# | Ret. Time | Area    | Height | Area %  | Height % |
|-------|-----------|---------|--------|---------|----------|
| 1     | 10.560    | 68191   | 3248   | 1.113   | 1.715    |
| 2     | 16.006    | 6060832 | 186127 | 98.887  | 98.285   |
| Total |           | 6129023 | 189375 | 100.000 | 100.000  |

# <sup>1</sup>H NMR, <sup>13</sup>C NMR and HPLC of 3e

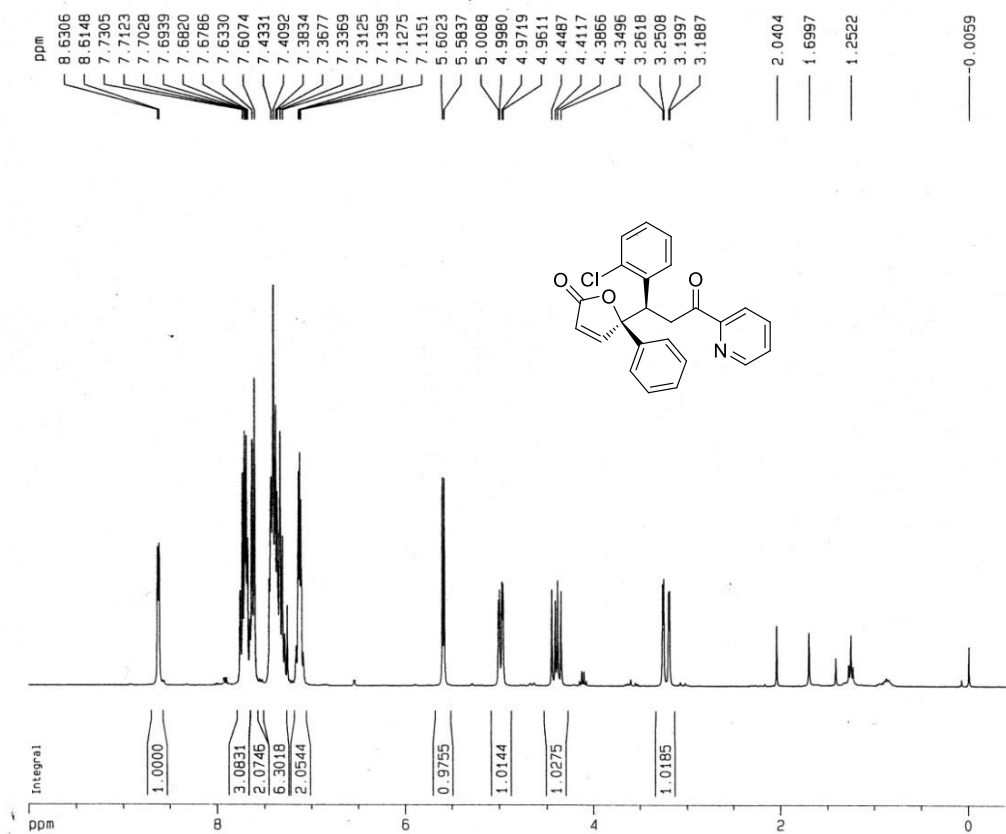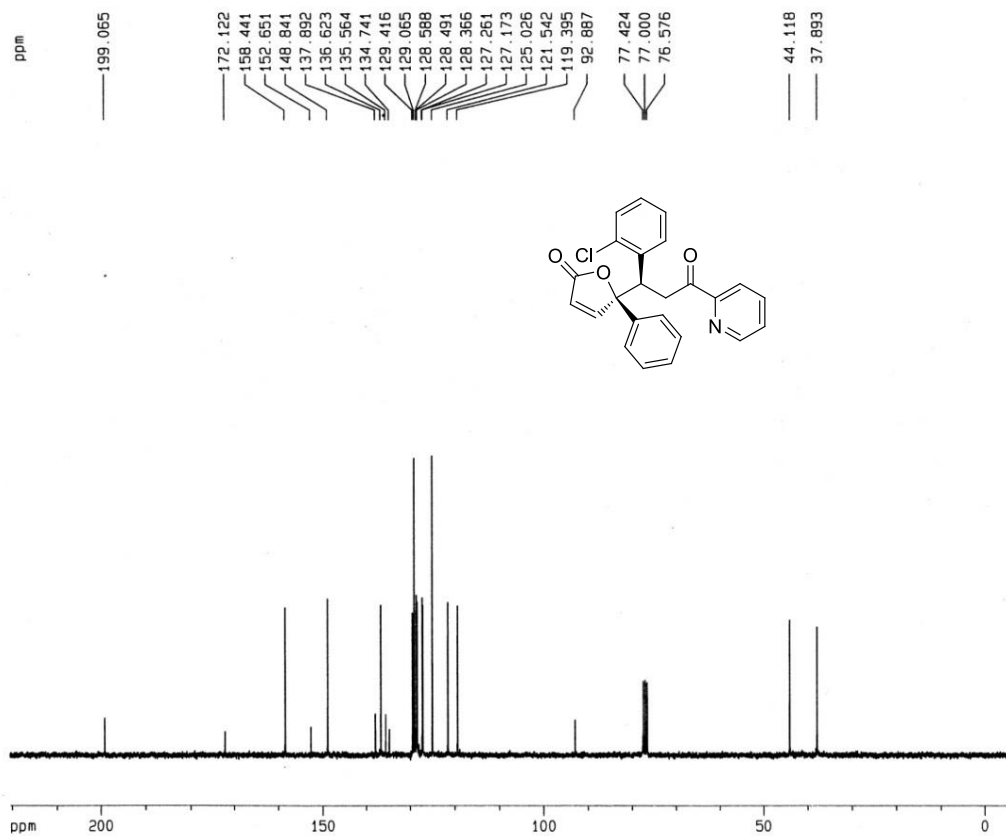

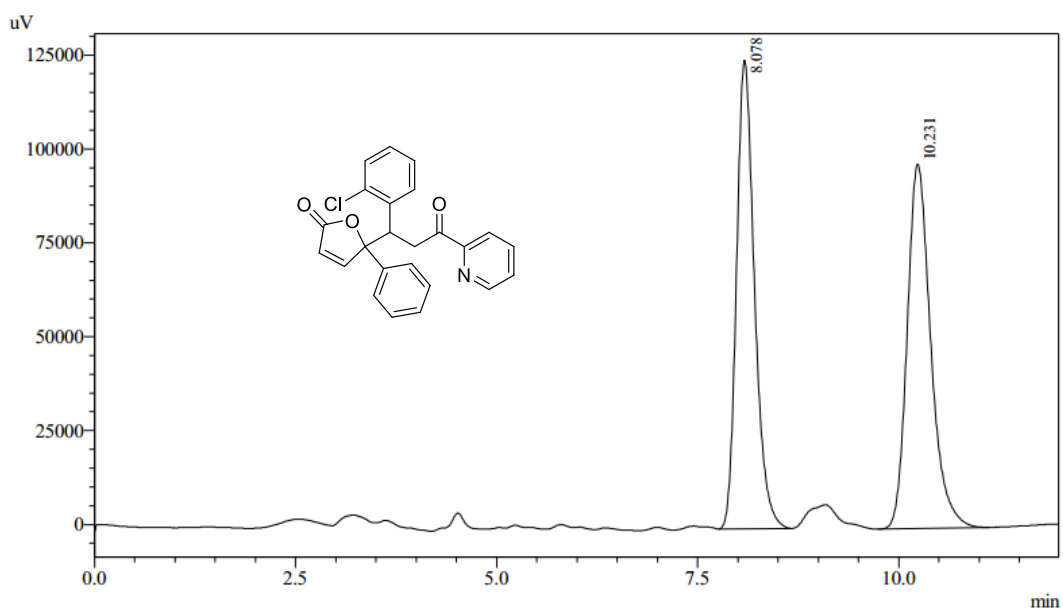

1 Det.A Ch1 / 254nm

Detector A Ch1 254nm

| Peak# | Ret. Time | Area    | Height | Area %  | Height % |
|-------|-----------|---------|--------|---------|----------|
| 1     | 8.078     | 1936513 | 124787 | 49.513  | 56.260   |
| 2     | 10.231    | 1974612 | 97019  | 50.487  | 43.740   |
| Total |           | 3911125 | 221806 | 100.000 | 100.000  |

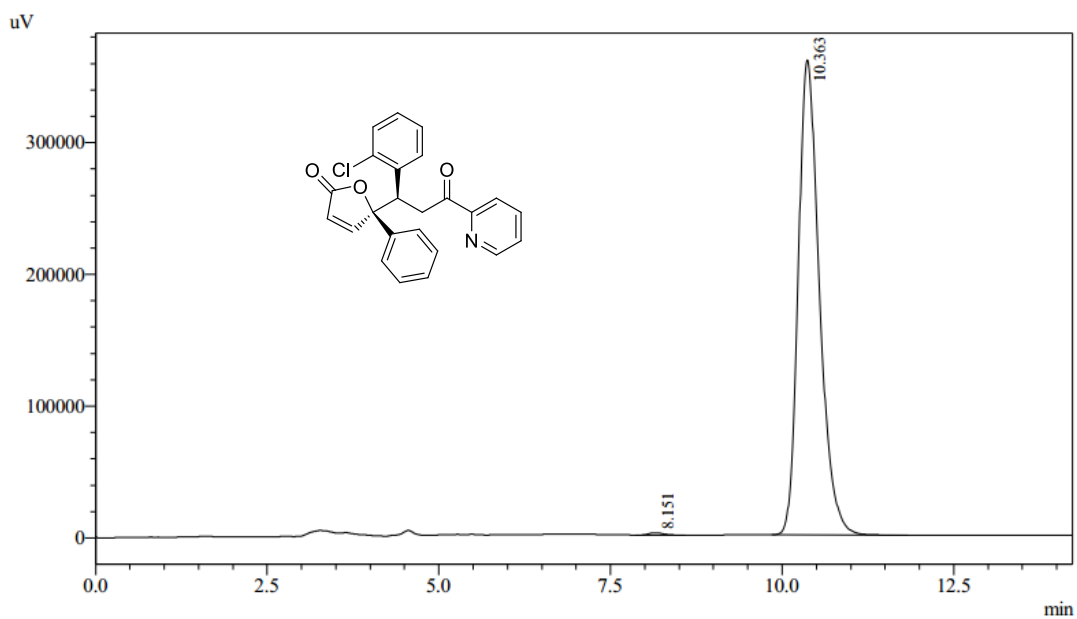

1 Det.A Ch1 / 254nm

Detector A Ch1 254nm

| Peak# | Ret. Time | Area    | Height | Area %  | Height % |
|-------|-----------|---------|--------|---------|----------|
| 1     | 8.151     | 26790   | 1775   | 0.346   | 0.490    |
| 2     | 10.363    | 7715369 | 360327 | 99.654  | 99.510   |
| Total |           | 7742160 | 362103 | 100.000 | 100.000  |



# <sup>1</sup>H NMR, <sup>13</sup>C NMR and HPLC of 3f

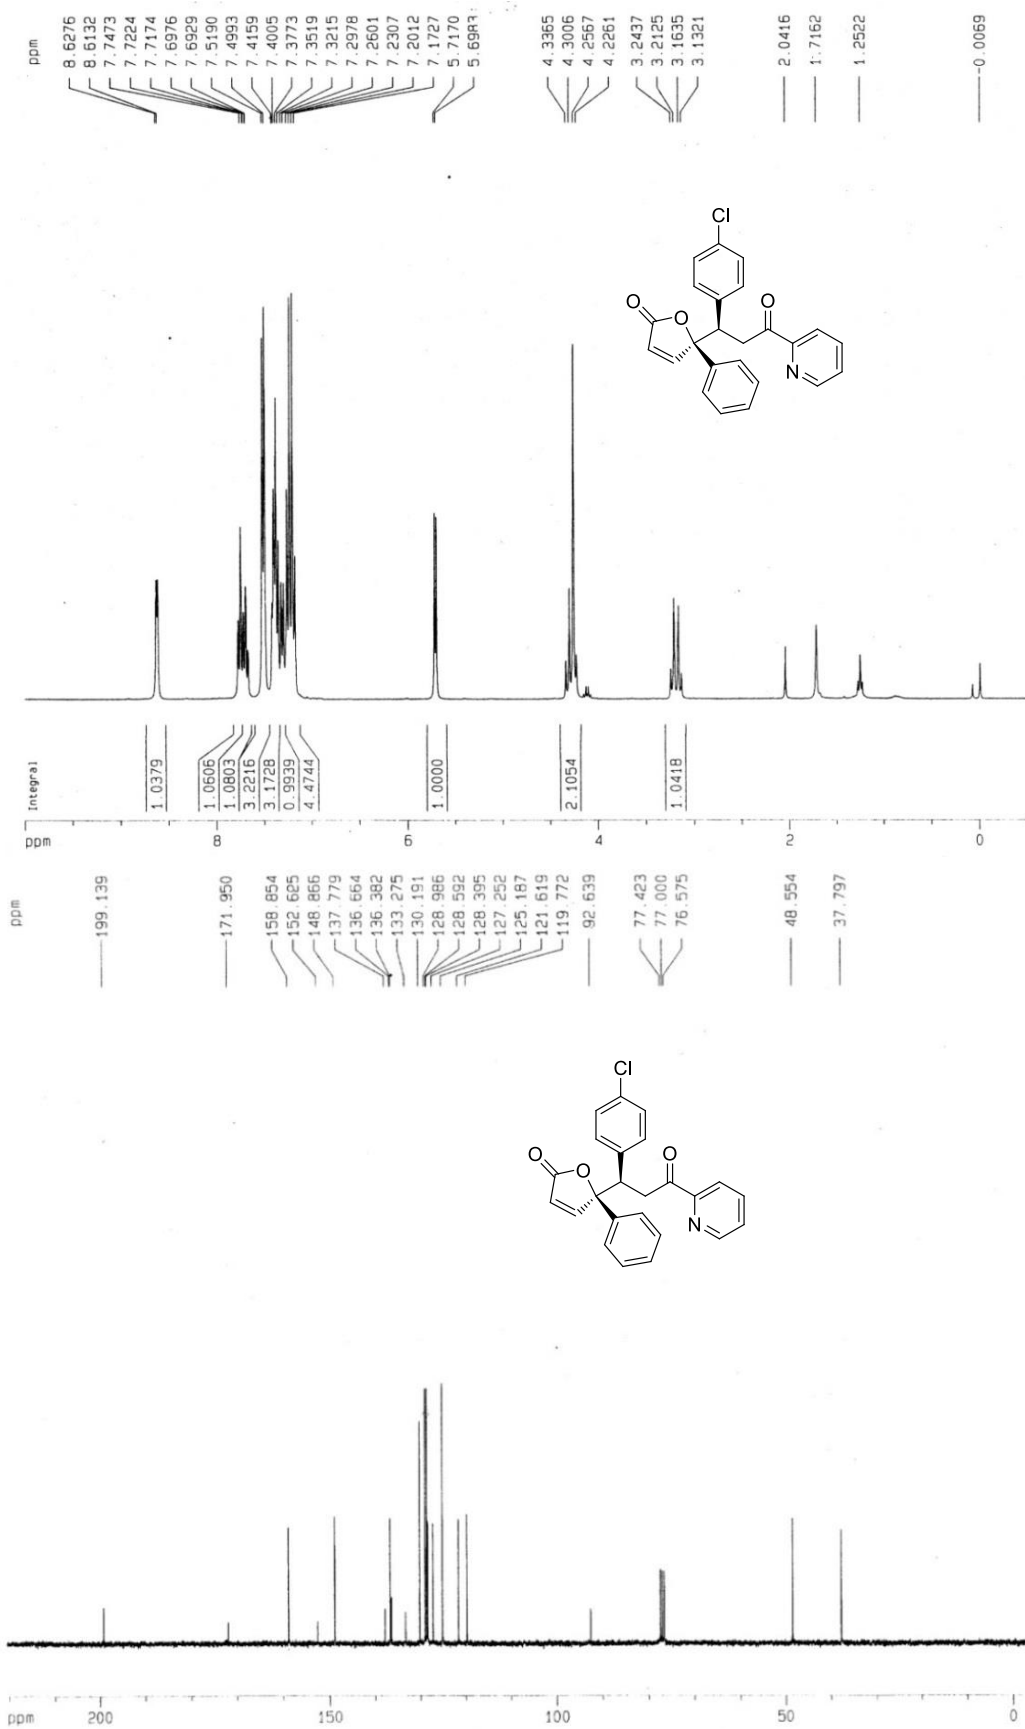

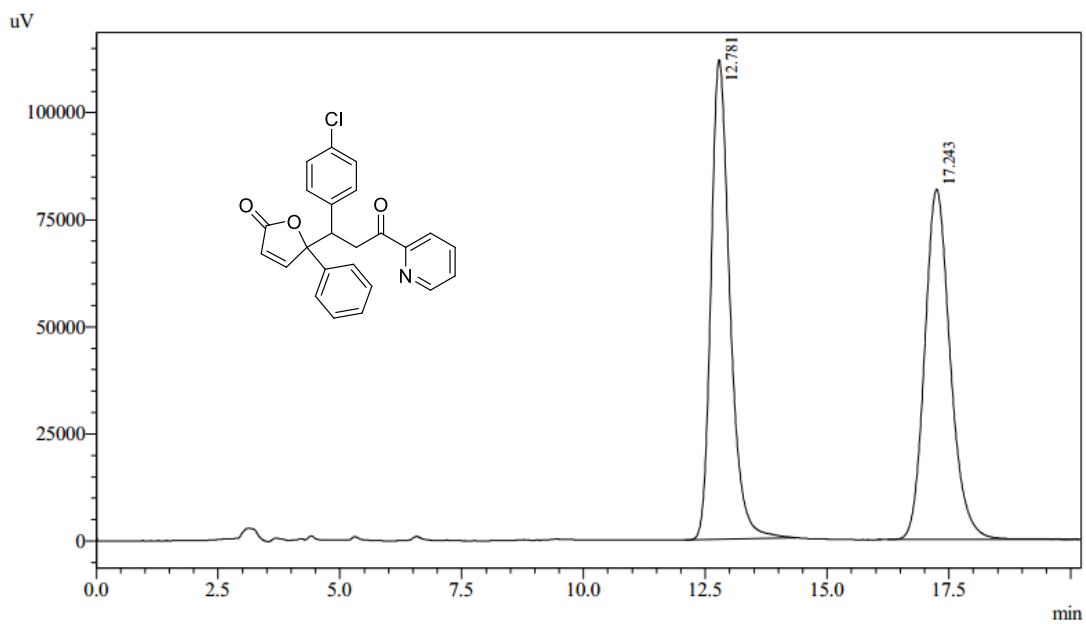

1 Det.A Ch1 / 254nm

Detector A Ch1 254nm

| Peak# | Ret. Time | Area    | Height | Area %  | Height % |
|-------|-----------|---------|--------|---------|----------|
| 1     | 12.781    | 3021707 | 111974 | 50.313  | 57.790   |
| 2     | 17.243    | 2984058 | 81786  | 49.687  | 42.210   |
| Total |           | 6005765 | 193759 | 100.000 | 100.000  |

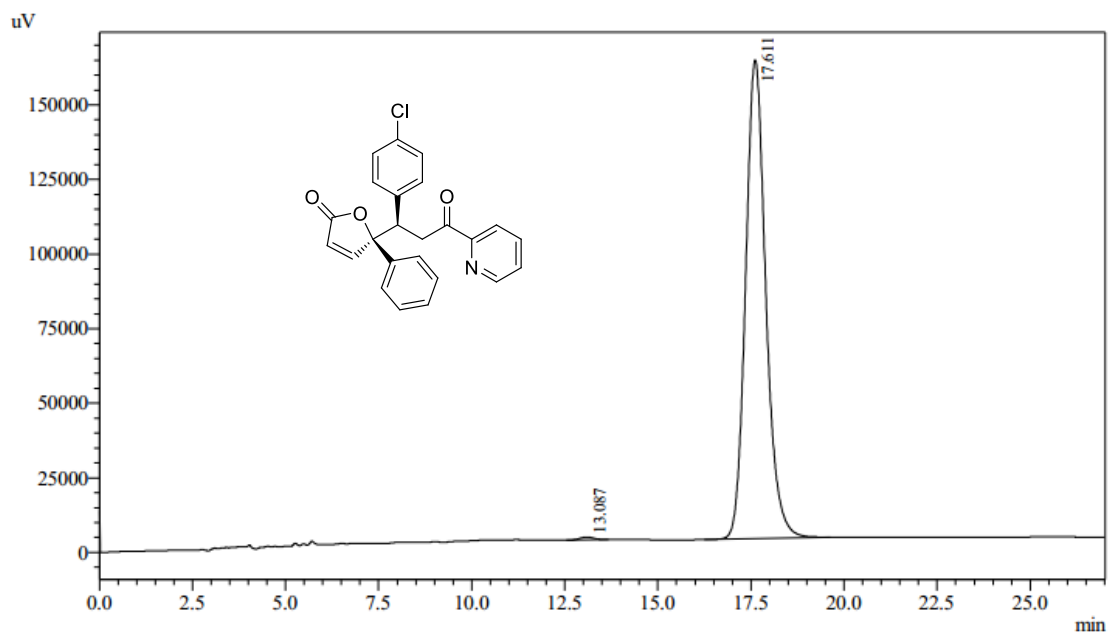

1 Det.A Ch1 / 254nm

Detector A Ch1 254nm

| Peak# | Ret. Time | Area    | Height | Area %  | Height % |
|-------|-----------|---------|--------|---------|----------|
| 1     | 13.087    | 25242   | 989    | 0.415   | 0.612    |
| 2     | 17.611    | 6055641 | 160503 | 99.585  | 99.388   |
| Total |           | 6080882 | 161492 | 100.000 | 100.000  |

<sup>1</sup>H NMR, <sup>13</sup>C NMR and HPLC of 3g

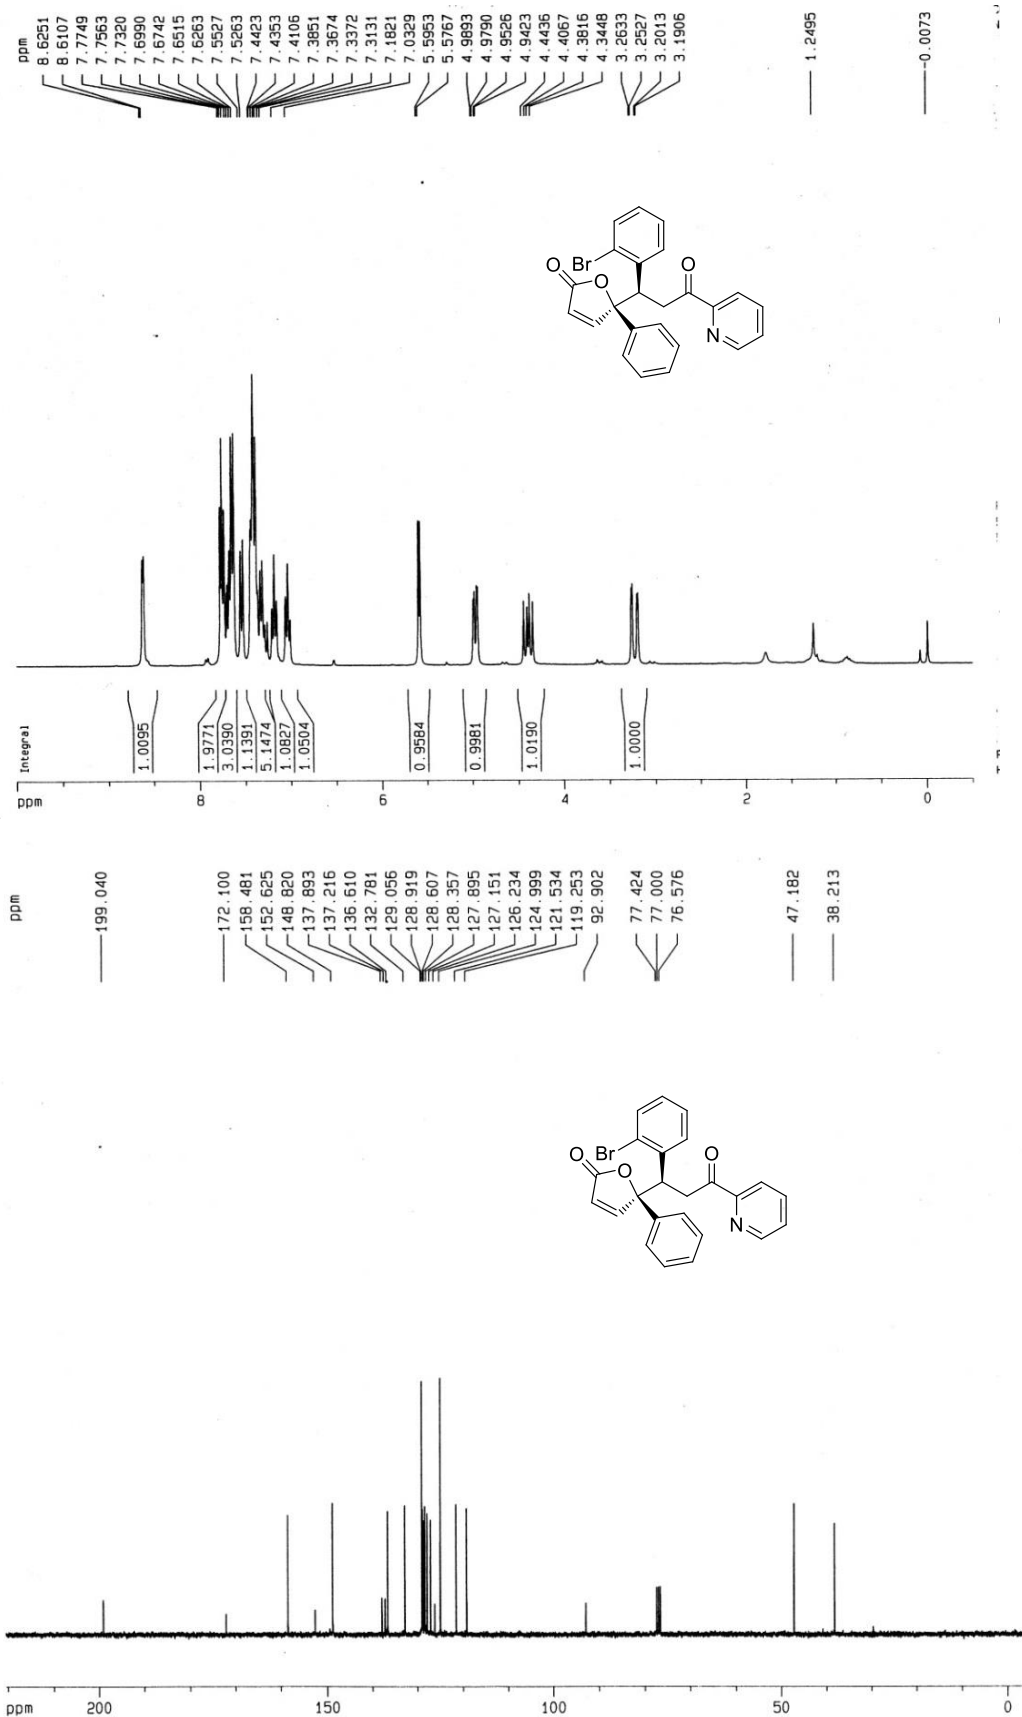

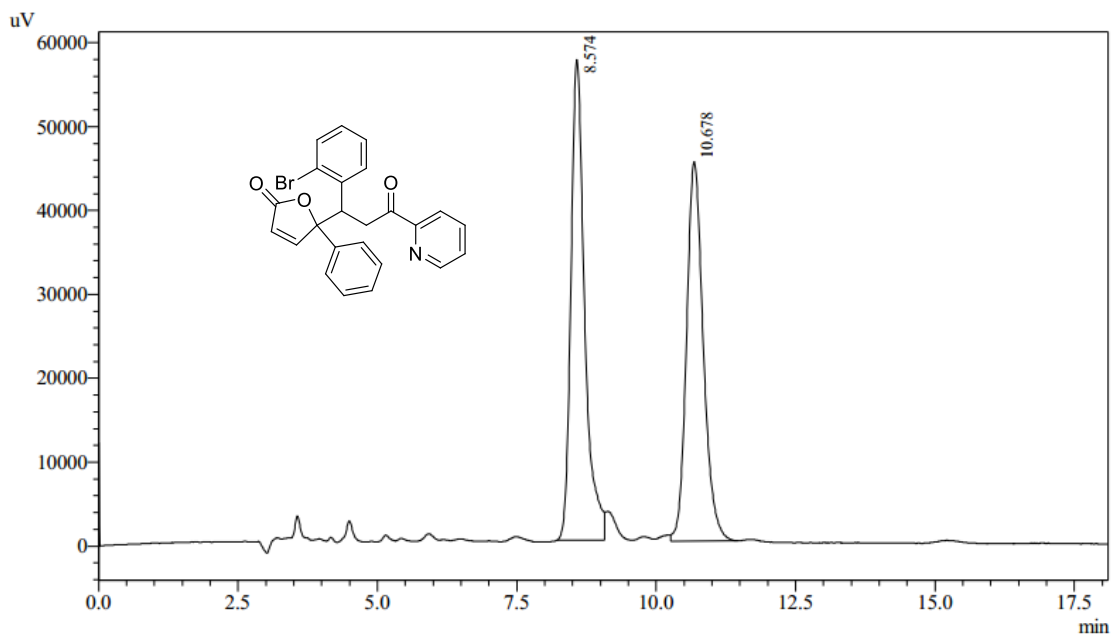

1 Det.A Ch1 / 254nm

Detector A Ch1 254nm

| Peak# | Ret. Time | Area    | Height | Area %  | Height % |
|-------|-----------|---------|--------|---------|----------|
| 1     | 8.574     | 981012  | 57280  | 50.878  | 55.880   |
| 2     | 10.678    | 947154  | 45226  | 49.122  | 44.120   |
| Total |           | 1928166 | 102506 | 100.000 | 100.000  |

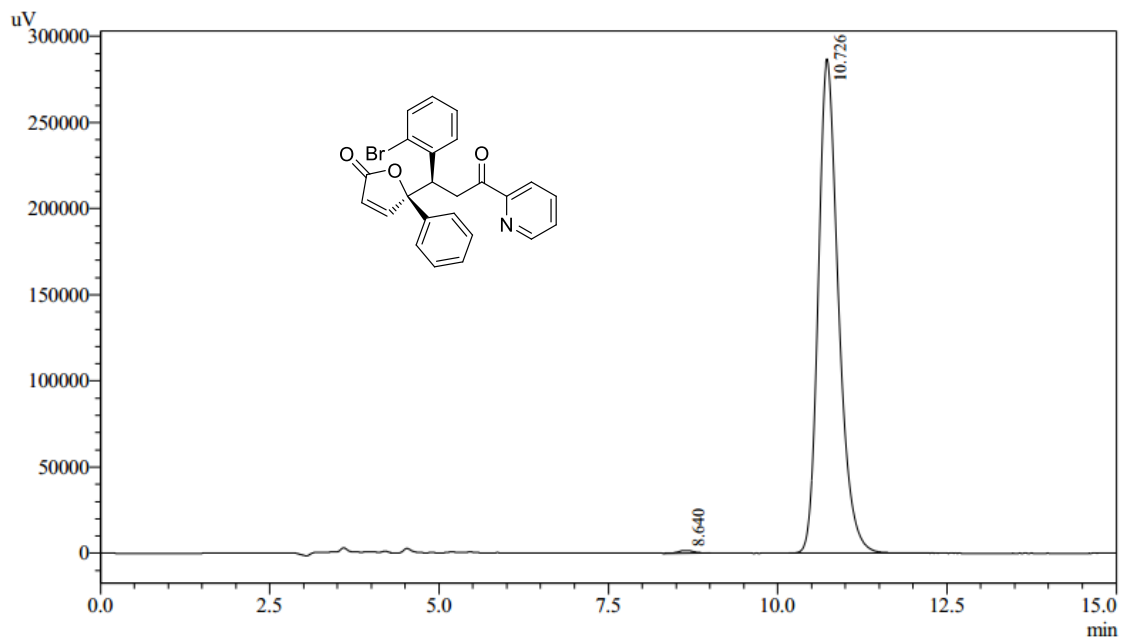

1 Det.A Ch1 / 254nm

Detector A Ch1 254nm

| Peak# | Ret. Time | Area    | Height | Area %  | Height % |
|-------|-----------|---------|--------|---------|----------|
| 1     | 8.640     | 24601   | 1591   | 0.406   | 0.551    |
| 2     | 10.726    | 6032016 | 286885 | 99.594  | 99.449   |
| Total |           | 6056616 | 288475 | 100.000 | 100.000  |

# <sup>1</sup>H NMR, <sup>13</sup>C NMR and HPLC of 3h

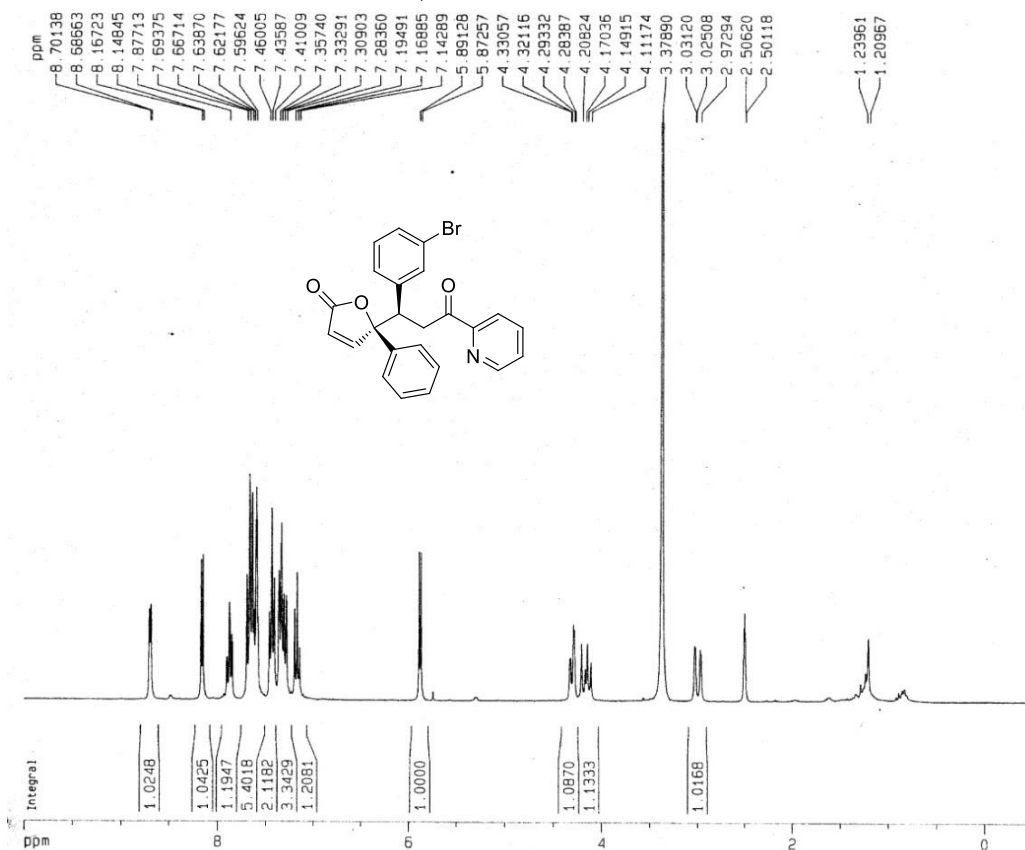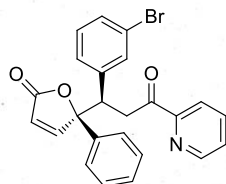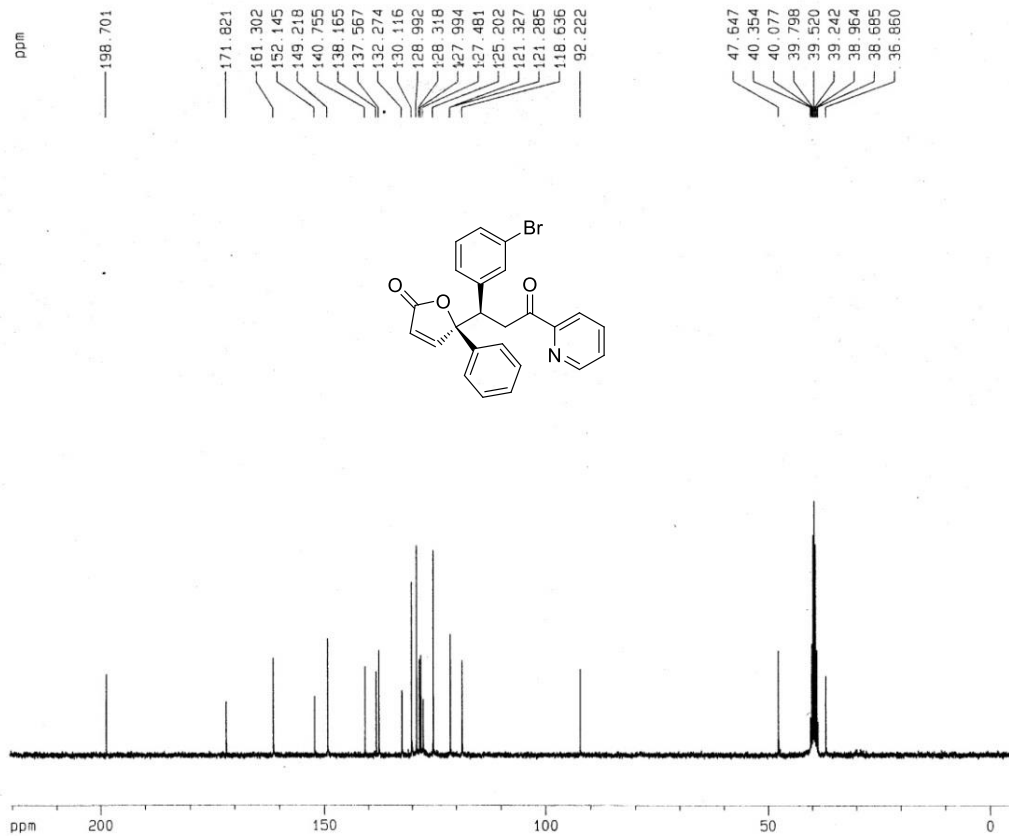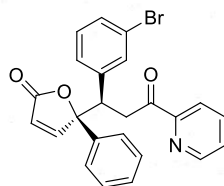

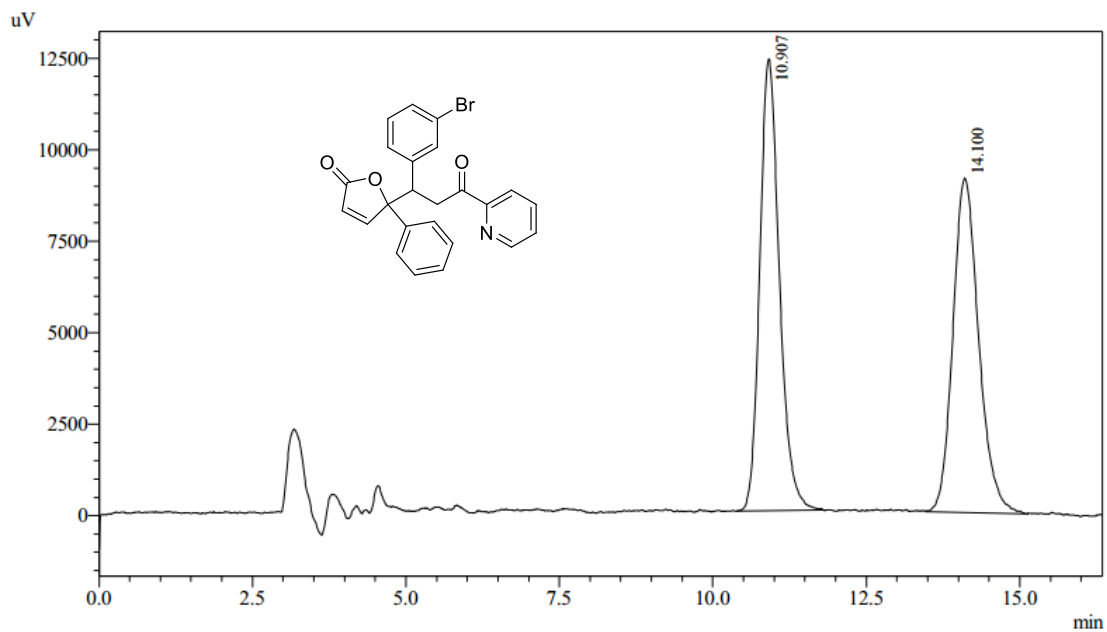

1 Det.A Ch1 / 254nm

Detector A Ch1 254nm

| Peak# | Ret. Time | Area   | Height | Area %  | Height % |
|-------|-----------|--------|--------|---------|----------|
| 1     | 10.907    | 274190 | 12350  | 50.668  | 57.461   |
| 2     | 14.100    | 266963 | 9143   | 49.332  | 42.539   |
| Total |           | 541153 | 21493  | 100.000 | 100.000  |

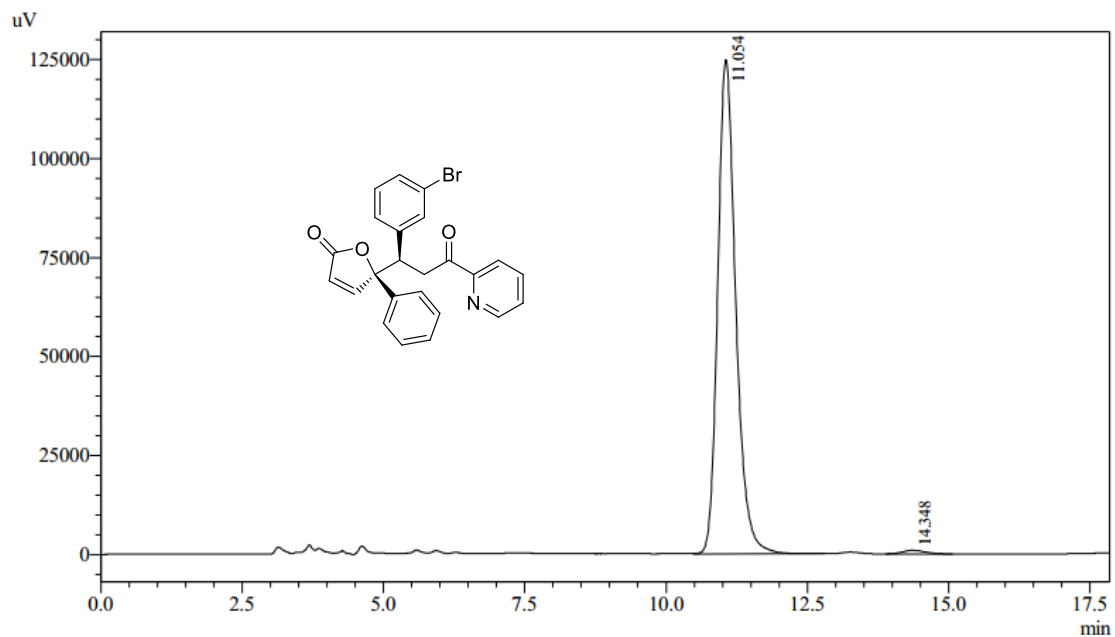

1 Det.A Ch1 / 254nm

Detector A Ch1 254nm

| Peak# | Ret. Time | Area    | Height | Area %  | Height % |
|-------|-----------|---------|--------|---------|----------|
| 1     | 11.054    | 2763661 | 124858 | 99.022  | 99.238   |
| 2     | 14.348    | 27285   | 959    | 0.978   | 0.762    |
| Total |           | 2790946 | 125817 | 100.000 | 100.000  |

# <sup>1</sup>H NMR, <sup>13</sup>C NMR and HPLC of 3i

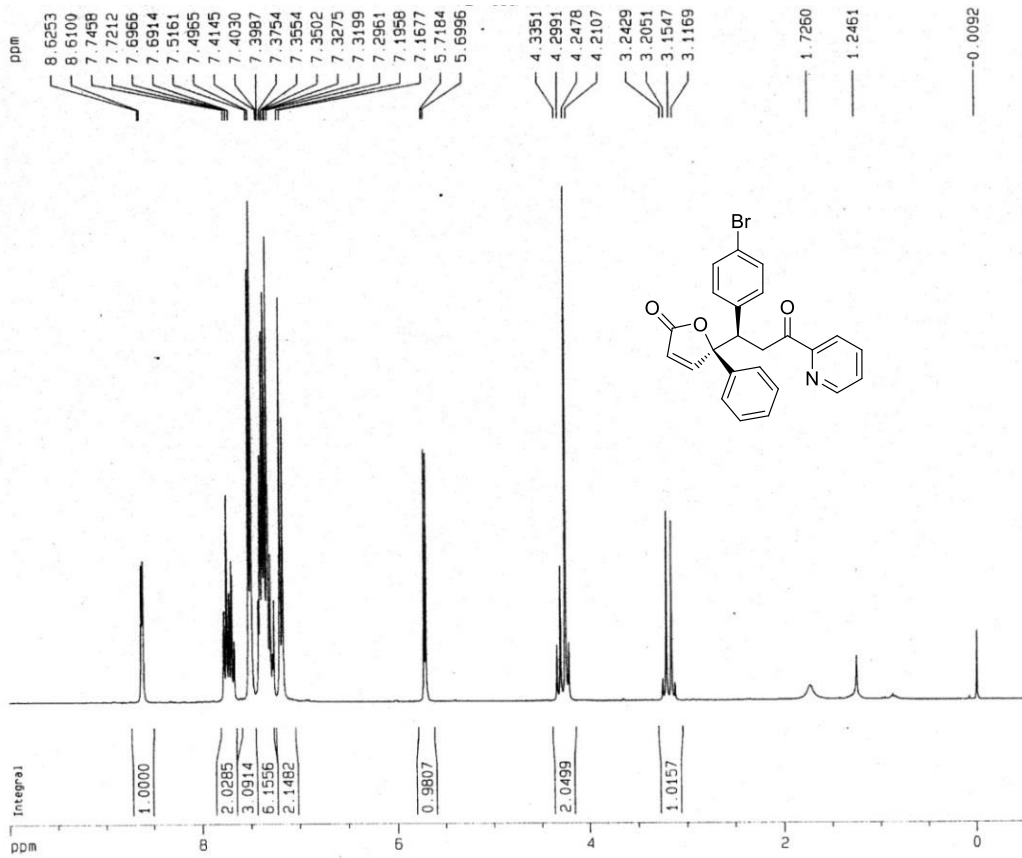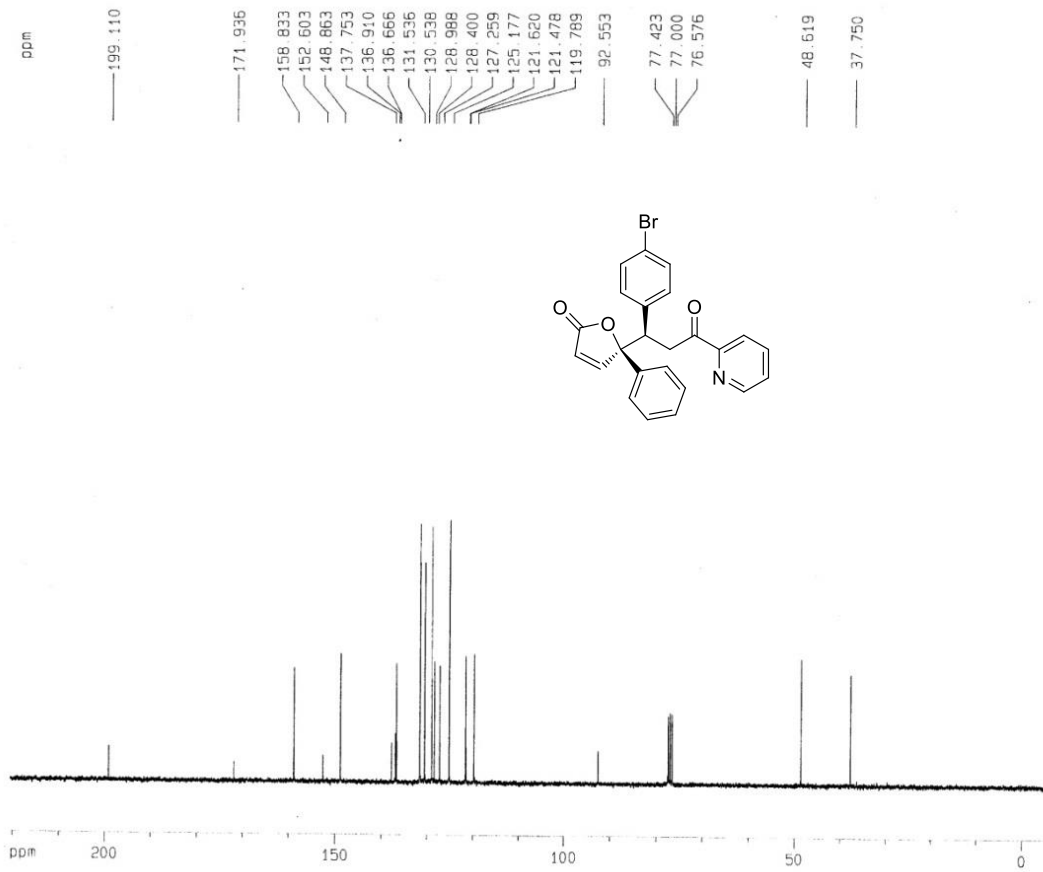

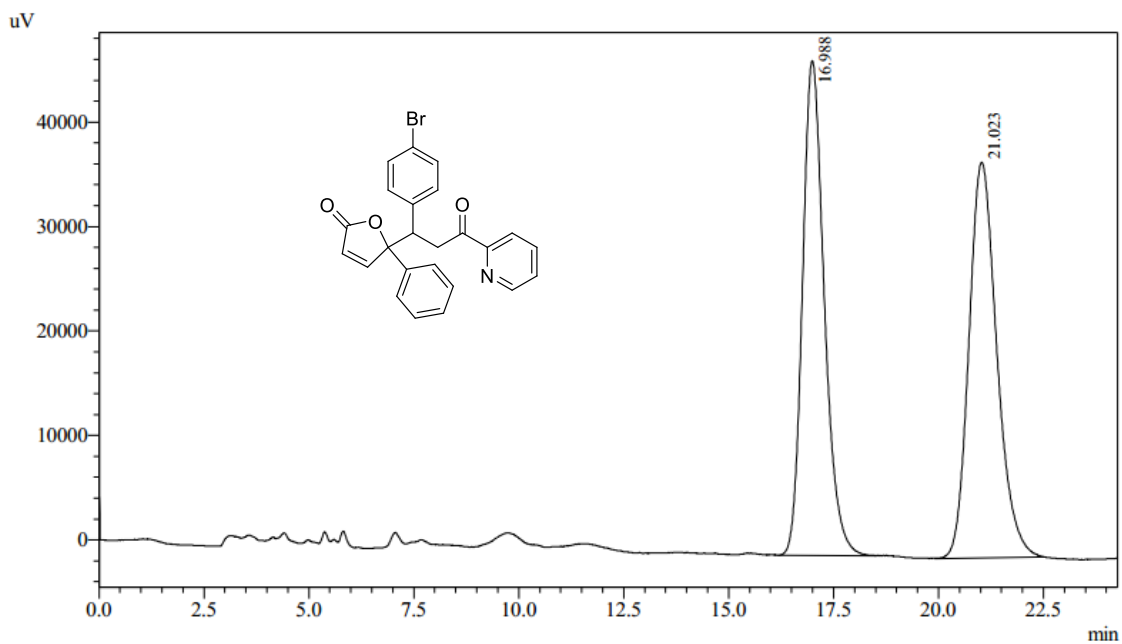

1 Det.A Ch1 / 254nm

Detector A Ch1 254nm

| Peak# | Ret. Time | Area    | Height | Area %  | Height % |
|-------|-----------|---------|--------|---------|----------|
| 1     | 16.988    | 1708821 | 47383  | 49.384  | 55.583   |
| 2     | 21.023    | 1751458 | 37865  | 50.616  | 44.417   |
| Total |           | 3460279 | 85248  | 100.000 | 100.000  |

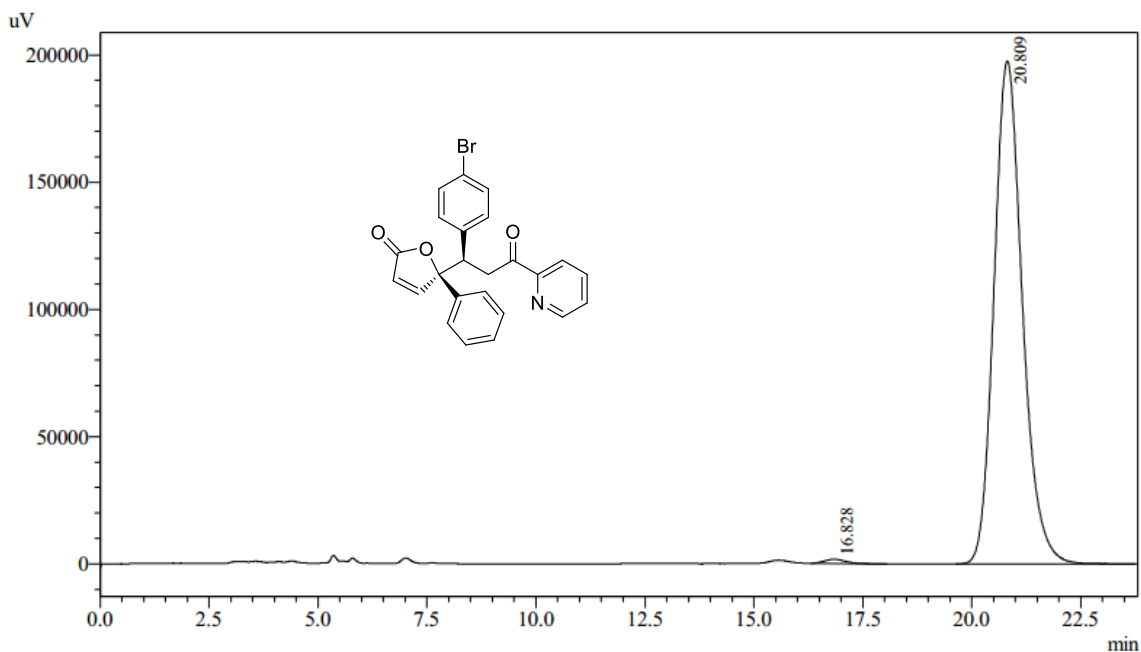

1 Det.A Ch1 / 254nm

Detector A Ch1 254nm

| Peak# | Ret. Time | Area    | Height | Area %  | Height % |
|-------|-----------|---------|--------|---------|----------|
| 1     | 16.828    | 55155   | 1661   | 0.612   | 0.833    |
| 2     | 20.809    | 8951636 | 197726 | 99.388  | 99.167   |
| Total |           | 9006790 | 199388 | 100.000 | 100.000  |



# <sup>1</sup>H NMR, <sup>13</sup>C NMR and HPLC of 3j

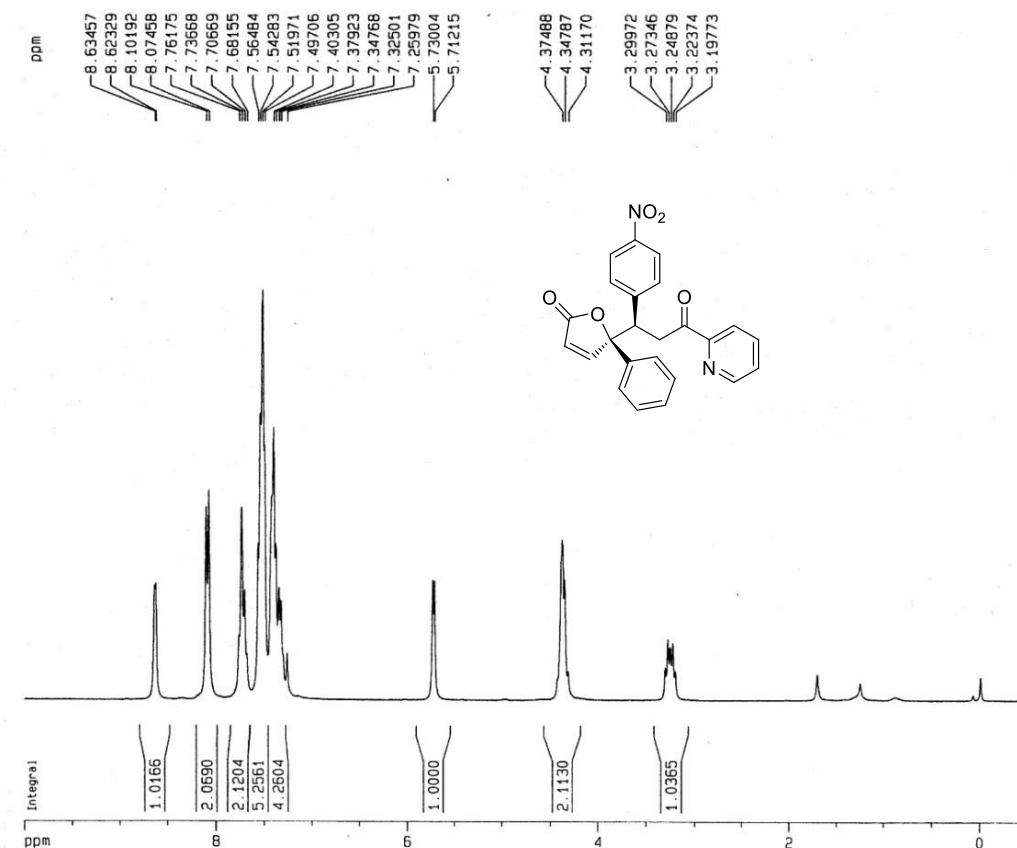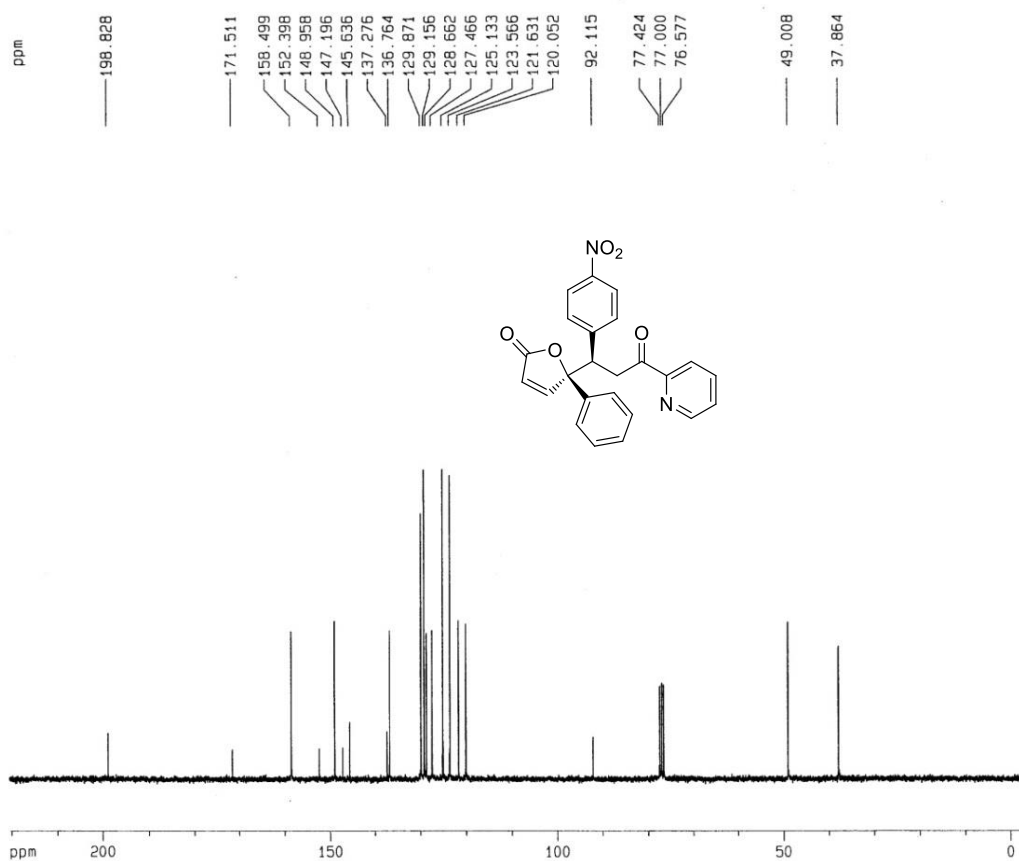

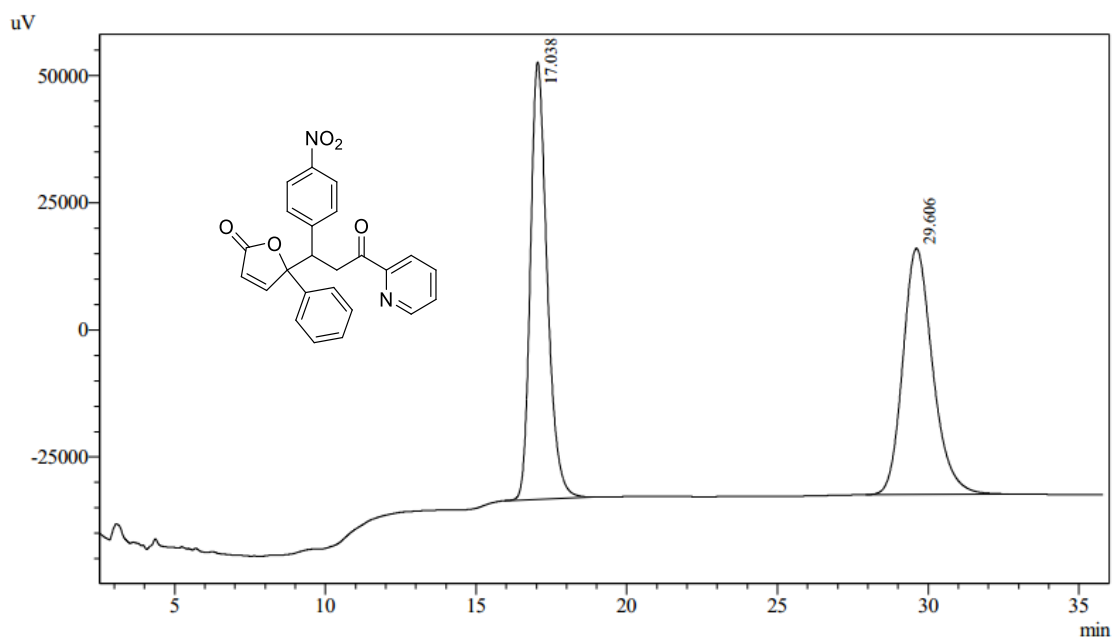

1 Det.A Ch1 / 254nm

Detector A Ch1 254nm

| Peak# | Ret. Time | Area    | Height | Area %  | Height % |
|-------|-----------|---------|--------|---------|----------|
| 1     | 17.038    | 3324965 | 86037  | 49.940  | 63.994   |
| 2     | 29.606    | 3333018 | 48408  | 50.060  | 36.006   |
| Total |           | 6657983 | 134445 | 100.000 | 100.000  |

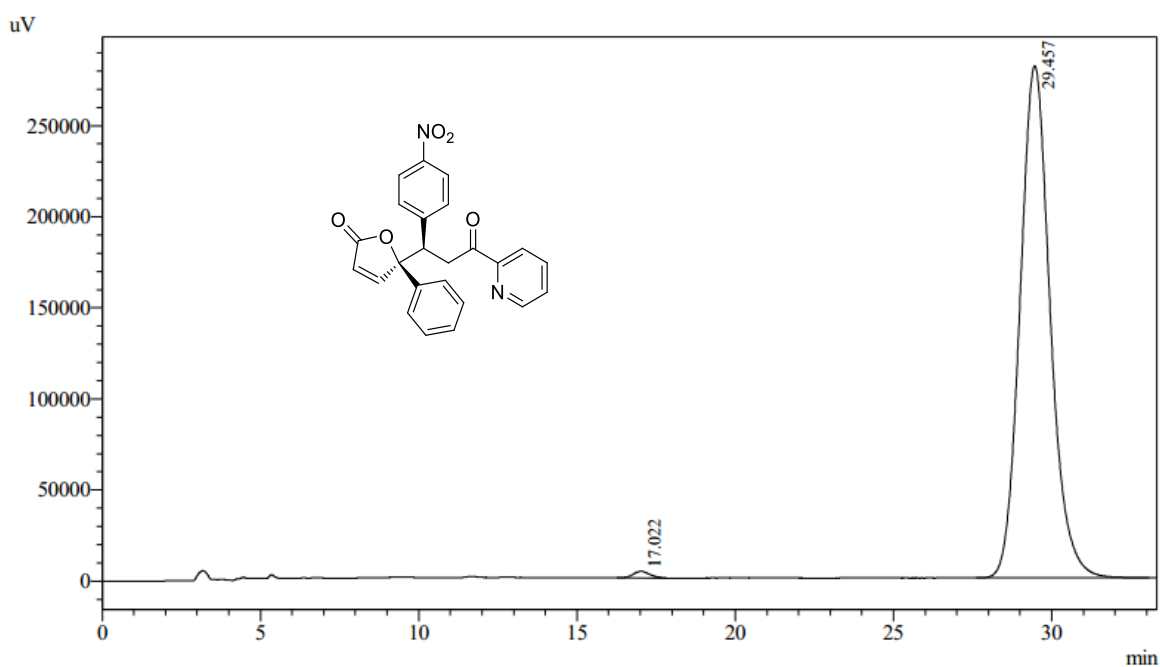

1 Det.A Ch1 / 254nm

Detector A Ch1 254nm

| Peak# | Ret. Time | Area     | Height | Area %  | Height % |
|-------|-----------|----------|--------|---------|----------|
| 1     | 17.022    | 136444   | 3677   | 0.729   | 1.291    |
| 2     | 29.457    | 18578062 | 281043 | 99.271  | 98.709   |
| Total |           | 18714506 | 284719 | 100.000 | 100.000  |

# <sup>1</sup>H NMR, <sup>13</sup>C NMR and HPLC of 3k

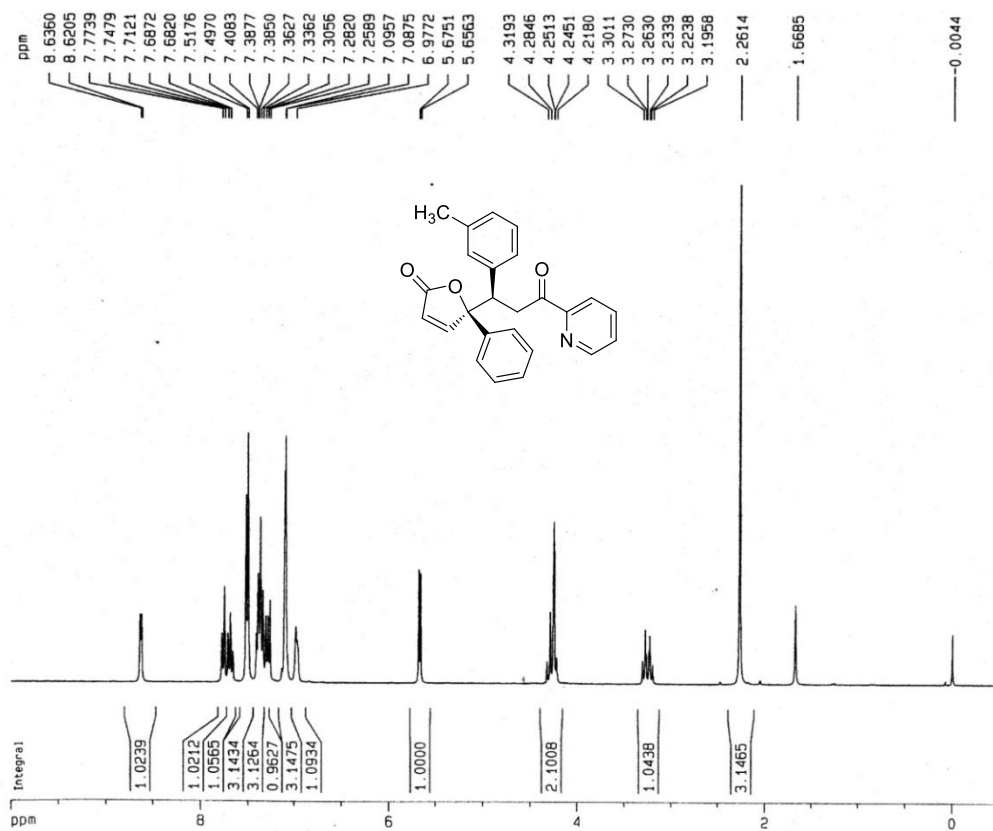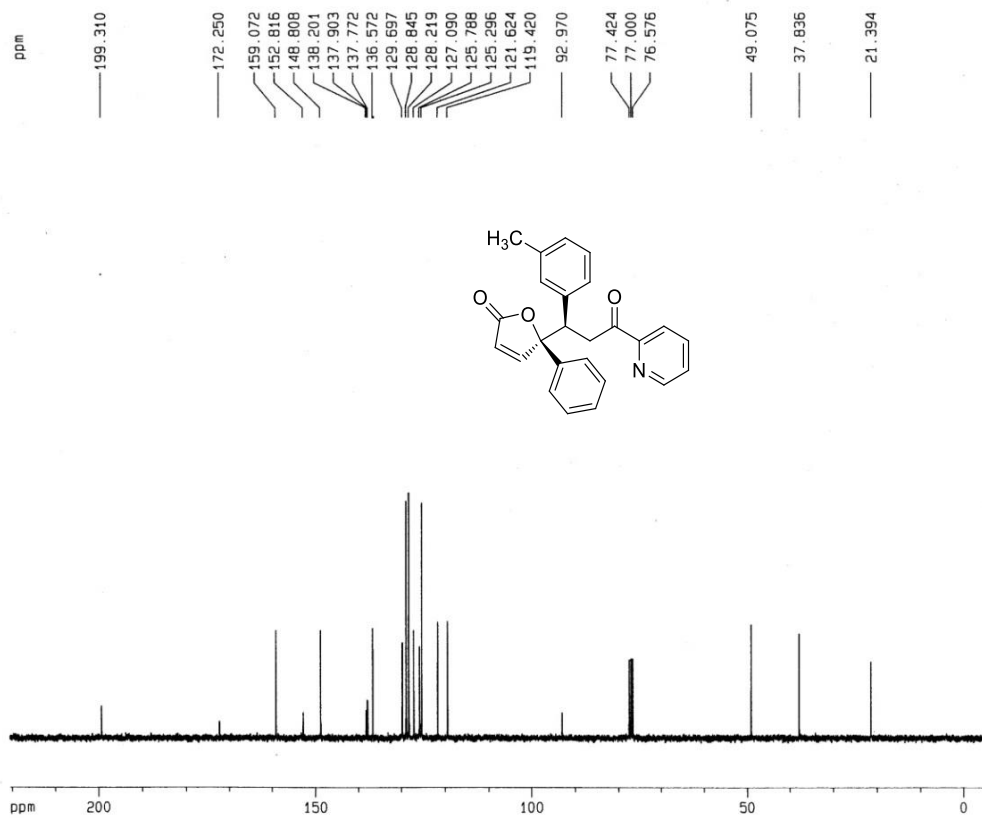

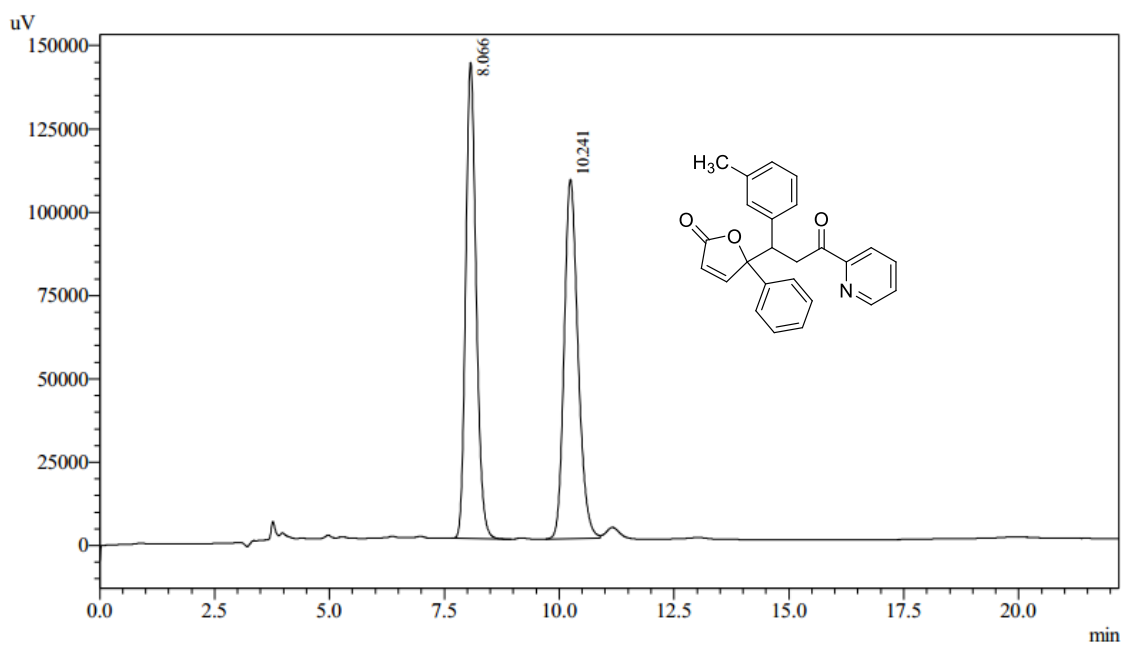

1 Det.A Ch1 / 254nm

Detector A Ch1 254nm

| Peak# | Ret. Time | Area    | Height | Area %  | Height % |
|-------|-----------|---------|--------|---------|----------|
| 1     | 8.066     | 2256902 | 142853 | 49.893  | 56.974   |
| 2     | 10.241    | 2266552 | 107883 | 50.107  | 43.026   |
| Total |           | 4523453 | 250736 | 100.000 | 100.000  |

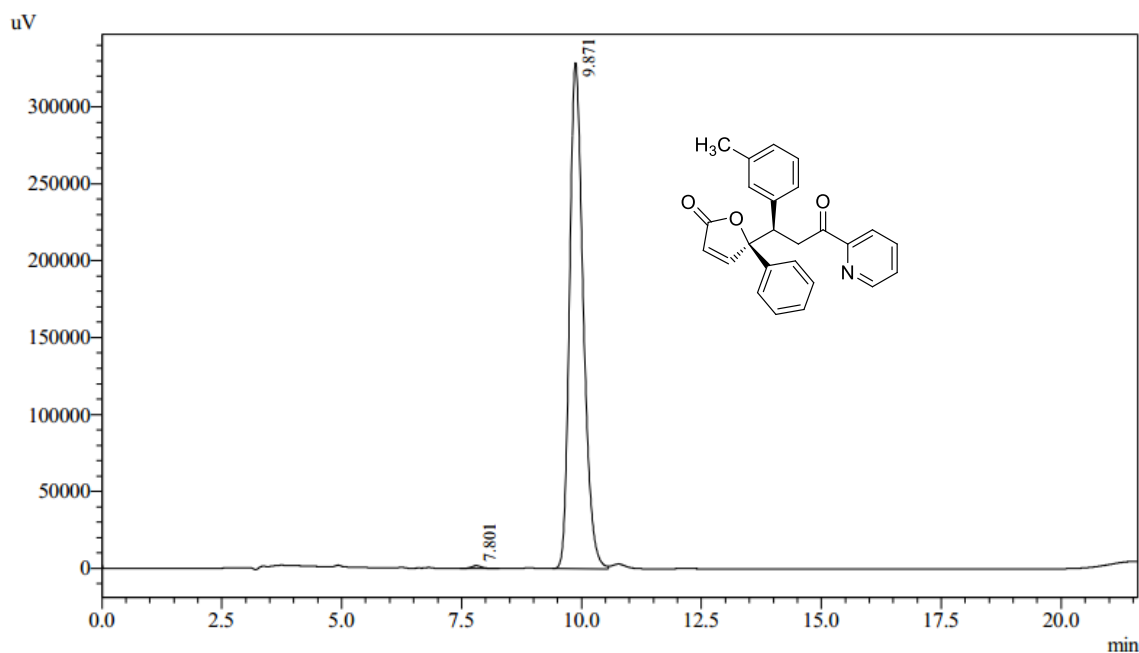

1 Det.A Ch1 / 254nm

Detector A Ch1 254nm

| Peak# | Ret. Time | Area    | Height | Area %  | Height % |
|-------|-----------|---------|--------|---------|----------|
| 1     | 7.801     | 29298   | 1882   | 0.445   | 0.569    |
| 2     | 9.871     | 6551908 | 328941 | 99.555  | 99.431   |
| Total |           | 6581206 | 330822 | 100.000 | 100.000  |

# <sup>1</sup>H NMR, <sup>13</sup>C NMR and HPLC of 3l

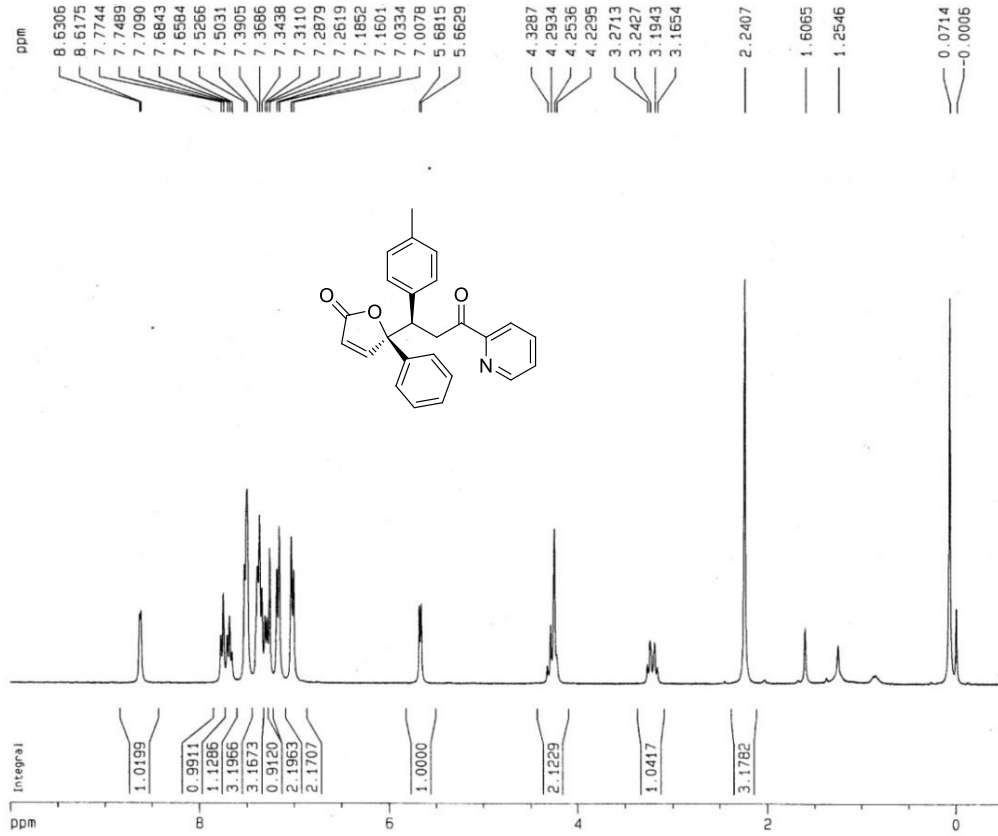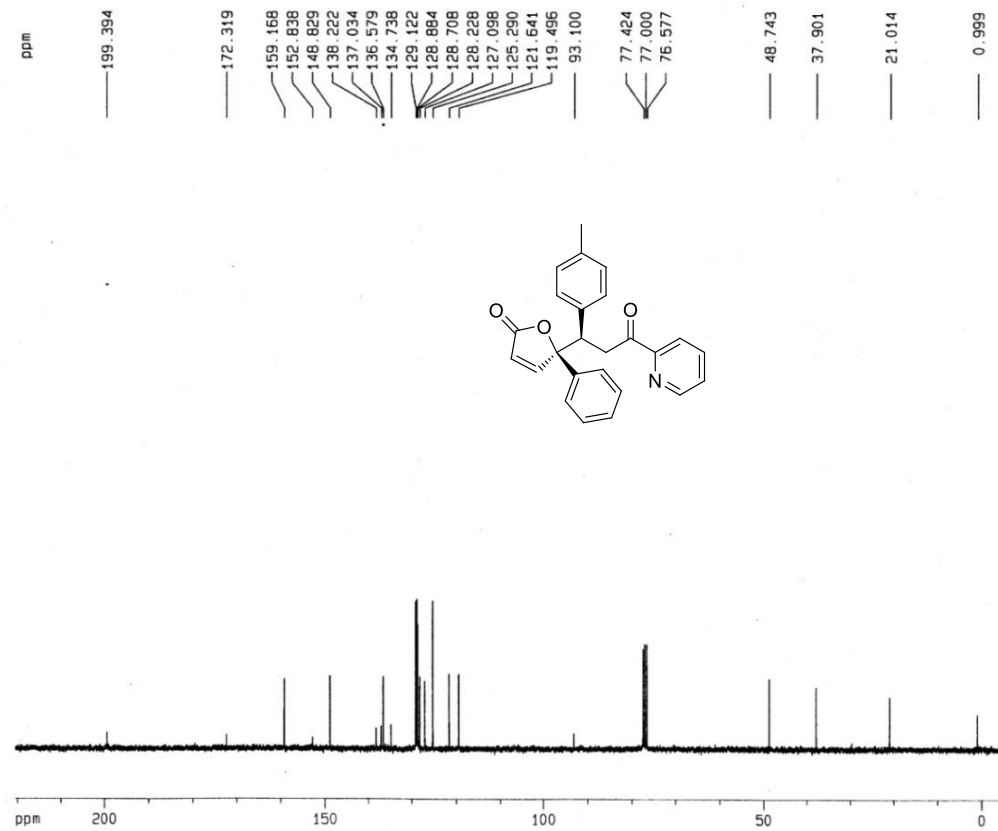

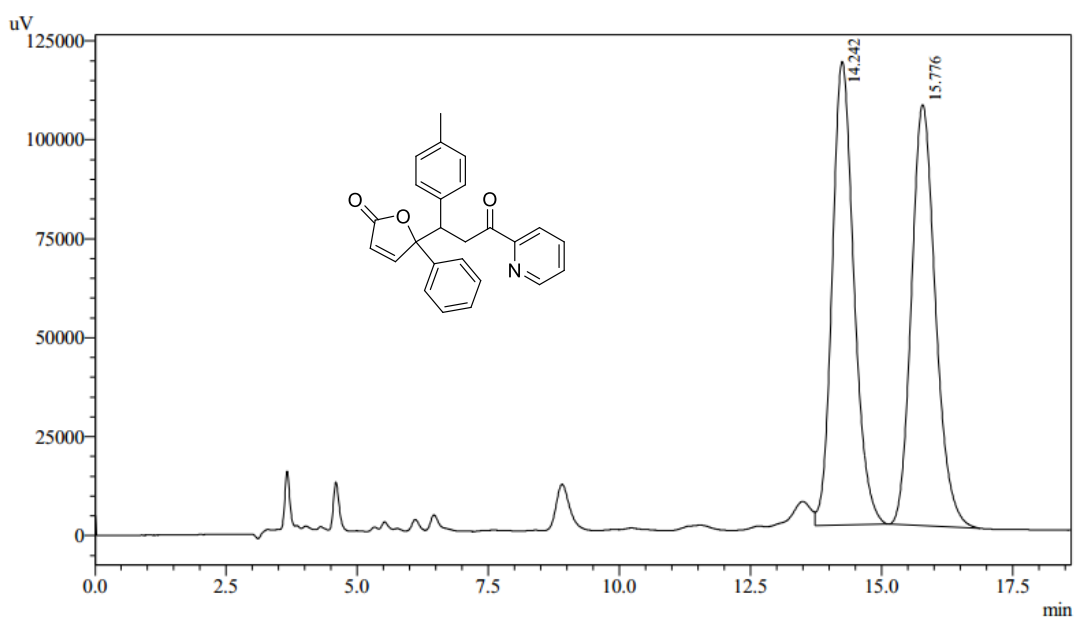

1 Det.A Ch1 / 254nm

Detector A Ch1 254nm

| Peak# | Ret. Time | Area    | Height | Area %  | Height % |
|-------|-----------|---------|--------|---------|----------|
| 1     | 14.242    | 3375174 | 117076 | 49.894  | 52.384   |
| 2     | 15.776    | 3389491 | 106420 | 50.106  | 47.616   |
| Total |           | 6764665 | 223497 | 100.000 | 100.000  |

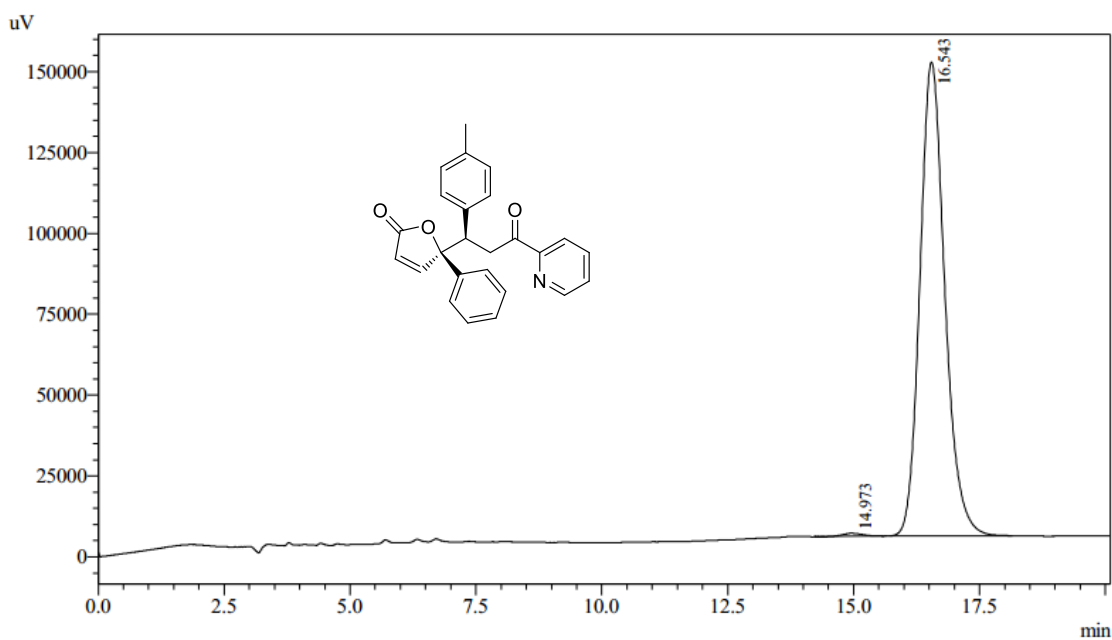

1 Det.A Ch1 / 254nm

Detector A Ch1 254nm

| Peak# | Ret. Time | Area    | Height | Area %  | Height % |
|-------|-----------|---------|--------|---------|----------|
| 1     | 14.973    | 26380   | 957    | 0.521   | 0.649    |
| 2     | 16.543    | 5038189 | 146505 | 99.479  | 99.351   |
| Total |           | 5064569 | 147462 | 100.000 | 100.000  |

# <sup>1</sup>H NMR, <sup>13</sup>C NMR and HPLC of 3m

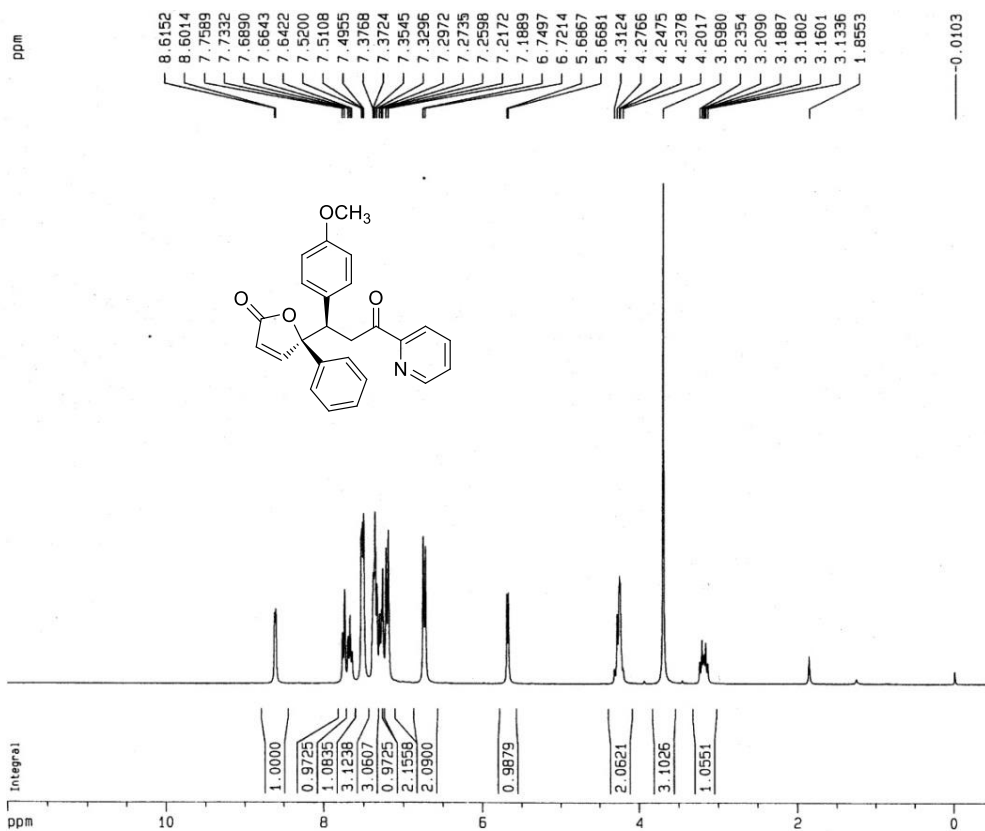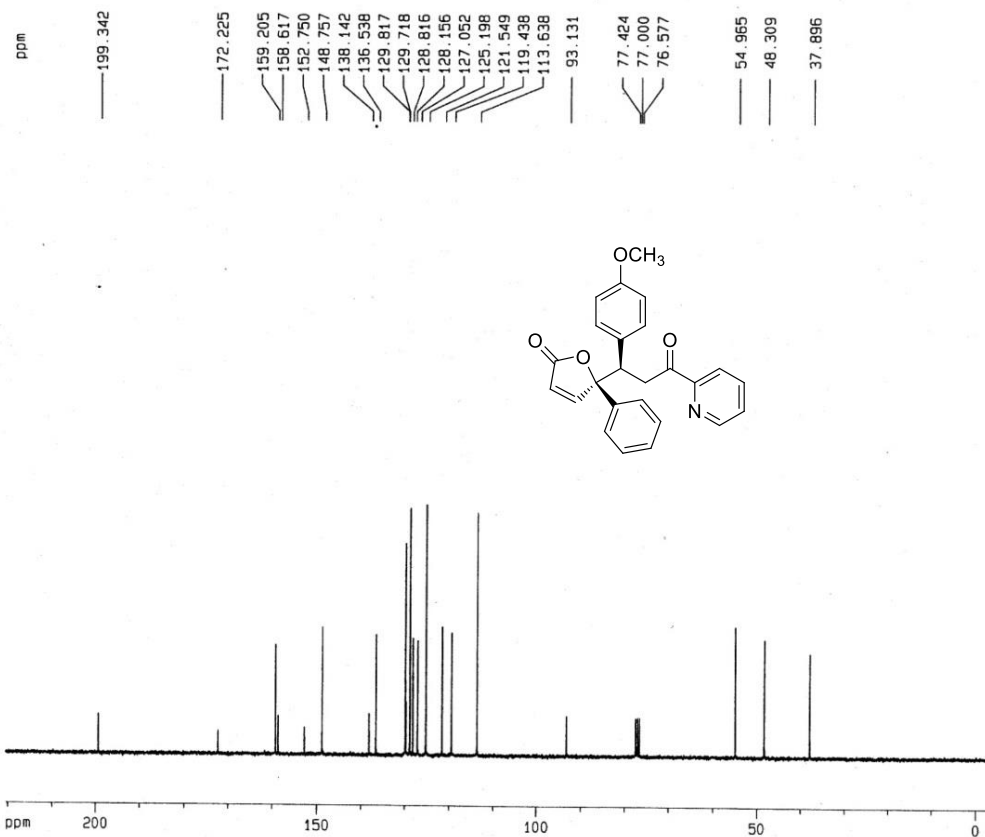

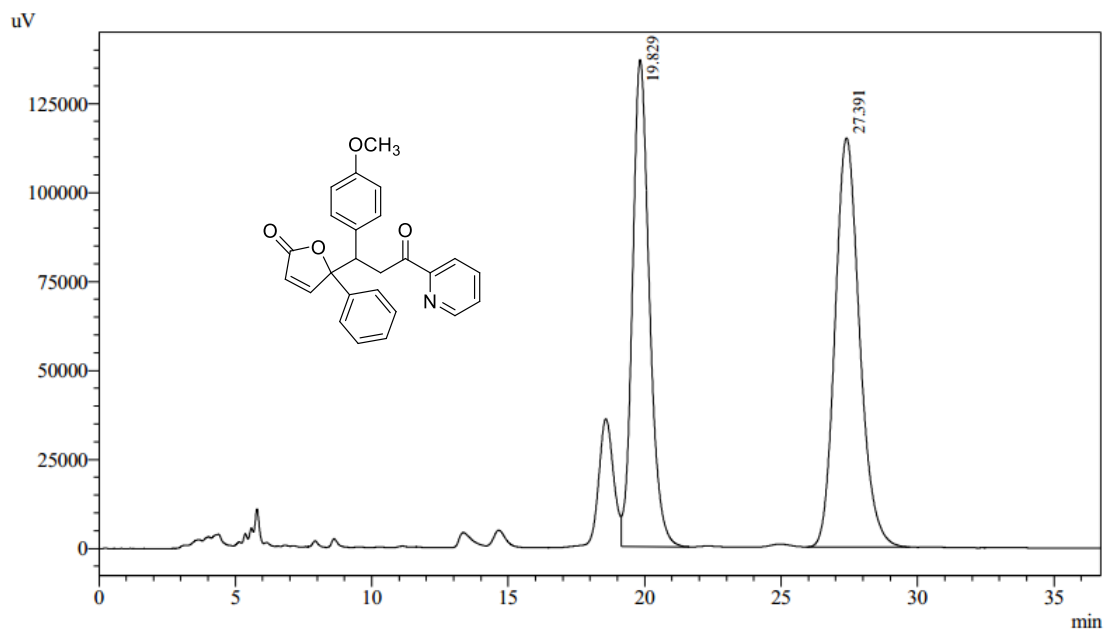

1 Det.A Ch1 / 254nm

Detector A Ch1 254nm

| Peak# | Ret. Time | Area     | Height | Area %  | Height % |
|-------|-----------|----------|--------|---------|----------|
| 1     | 19.829    | 5897851  | 136868 | 45.096  | 54.344   |
| 2     | 27.391    | 7180514  | 114988 | 54.904  | 45.656   |
| Total |           | 13078365 | 251856 | 100.000 | 100.000  |

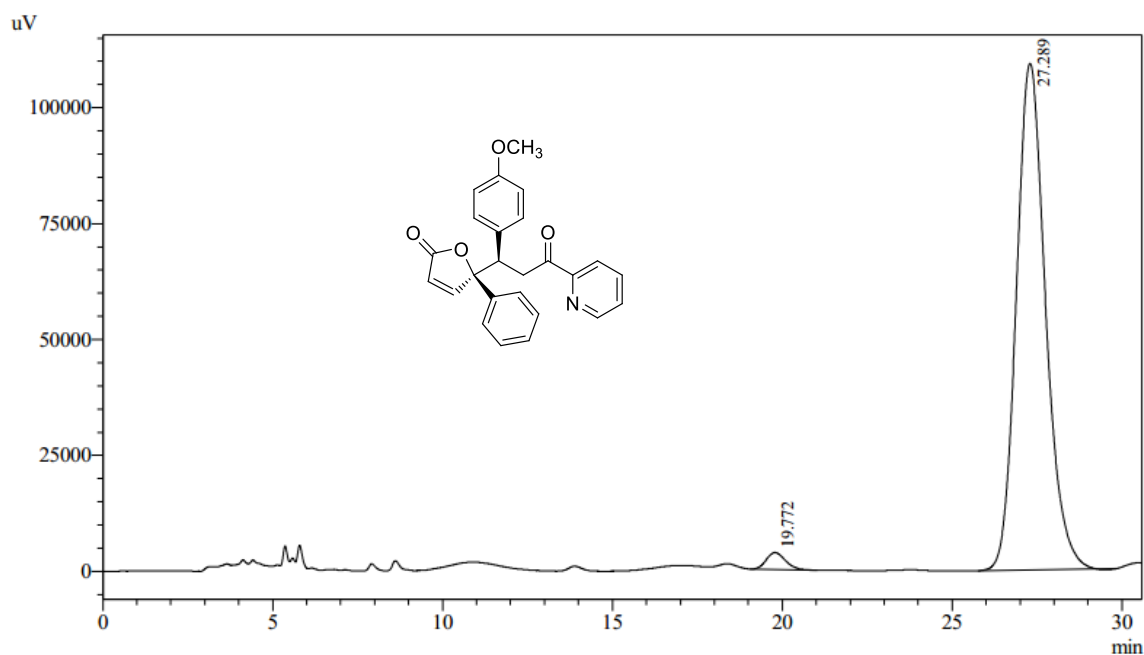

1 Det.A Ch1 / 254nm

Detector A Ch1 254nm

| Peak# | Ret. Time | Area    | Height | Area %  | Height % |
|-------|-----------|---------|--------|---------|----------|
| 1     | 19.772    | 145247  | 3673   | 2.179   | 3.253    |
| 2     | 27.289    | 6520208 | 109256 | 97.821  | 96.747   |
| Total |           | 6665454 | 112929 | 100.000 | 100.000  |



<sup>1</sup>H NMR, <sup>13</sup>C NMR and HPLC of 3n

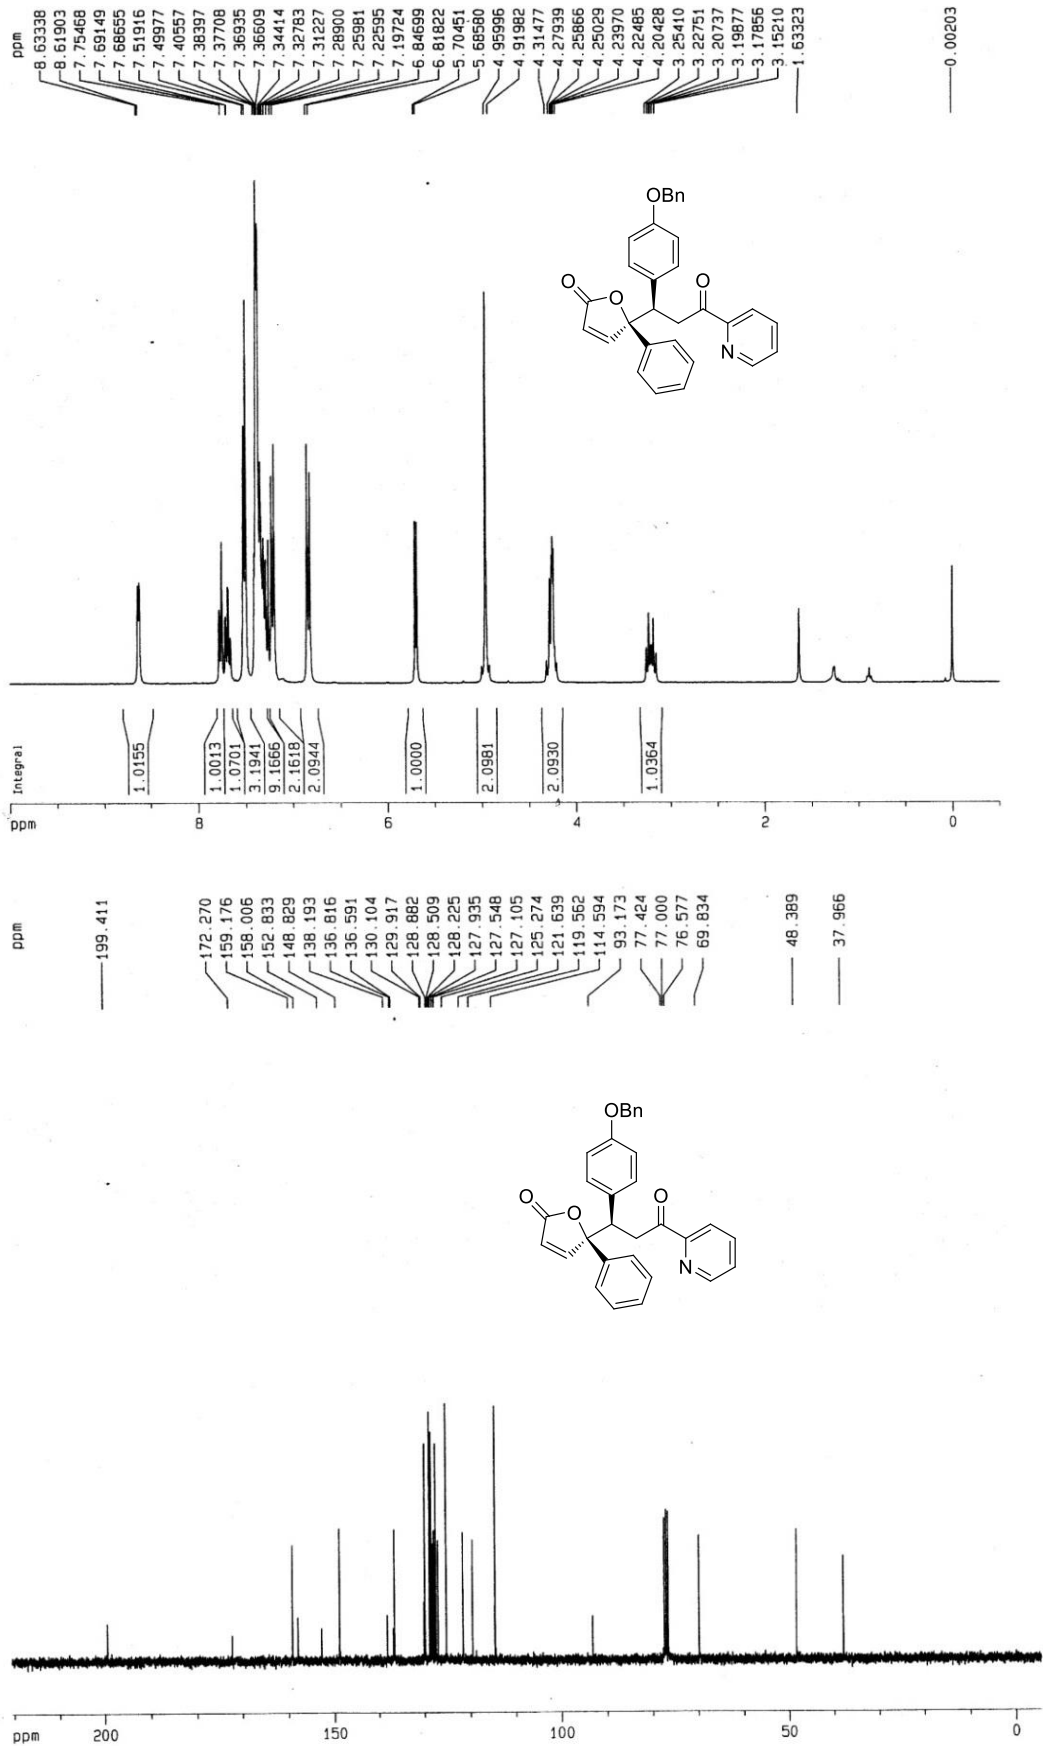

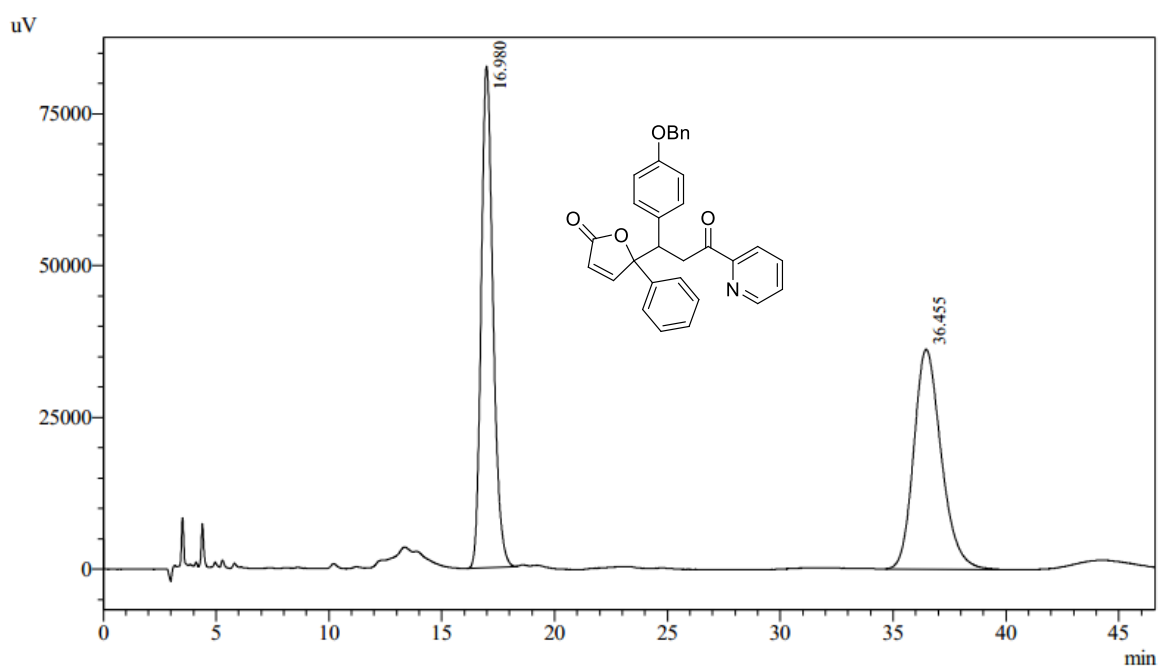

1 Det.A Ch1 / 254nm

Detector A Ch1 254nm

| Peak# | Ret. Time | Area    | Height | Area %  | Height % |
|-------|-----------|---------|--------|---------|----------|
| 1     | 16.980    | 3011432 | 82560  | 49.555  | 69.506   |
| 2     | 36.455    | 3065538 | 36221  | 50.445  | 30.494   |
| Total |           | 6076970 | 118781 | 100.000 | 100.000  |

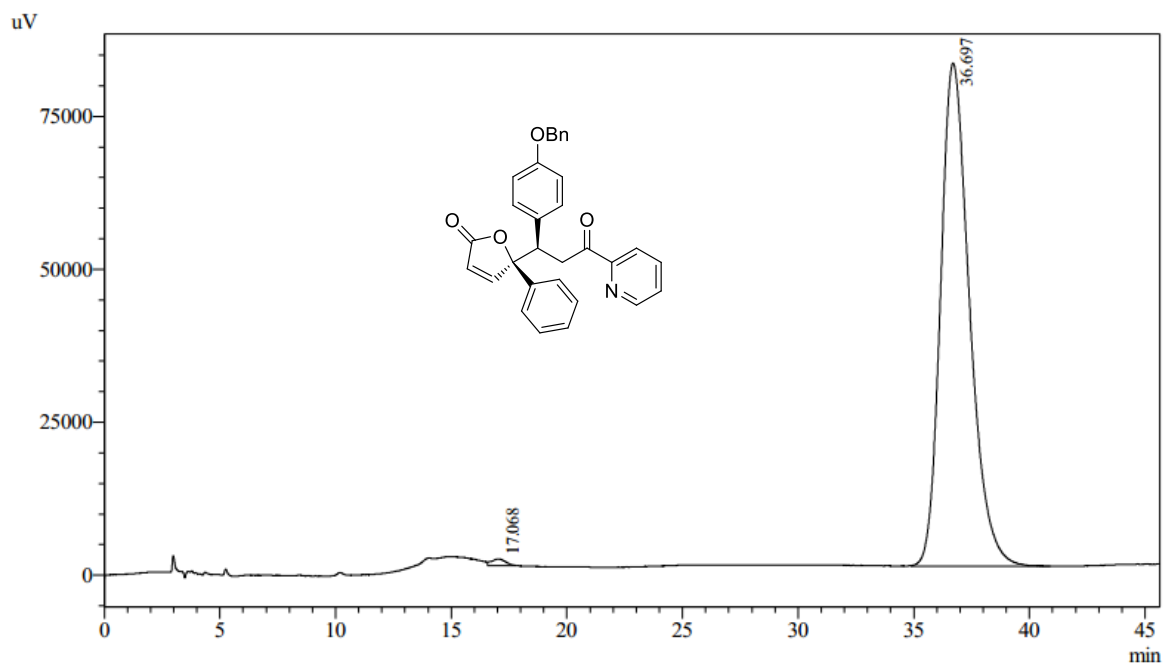

1 Det.A Ch1 / 254nm

Detector A Ch1 254nm

| Peak# | Ret. Time | Area    | Height | Area %  | Height % |
|-------|-----------|---------|--------|---------|----------|
| 1     | 17.068    | 47328   | 1118   | 0.657   | 1.341    |
| 2     | 36.697    | 7159946 | 82283  | 99.343  | 98.659   |
| Total |           | 7207274 | 83402  | 100.000 | 100.000  |

<sup>1</sup>H NMR, <sup>13</sup>C NMR and HPLC of 3o

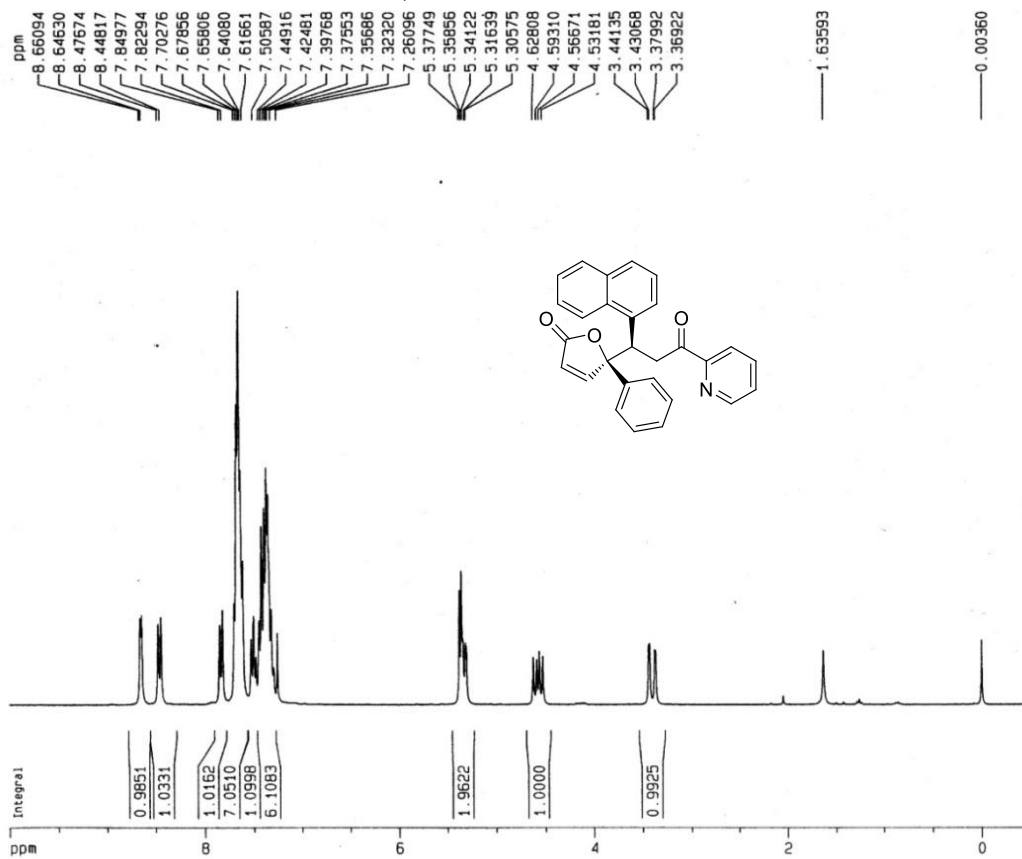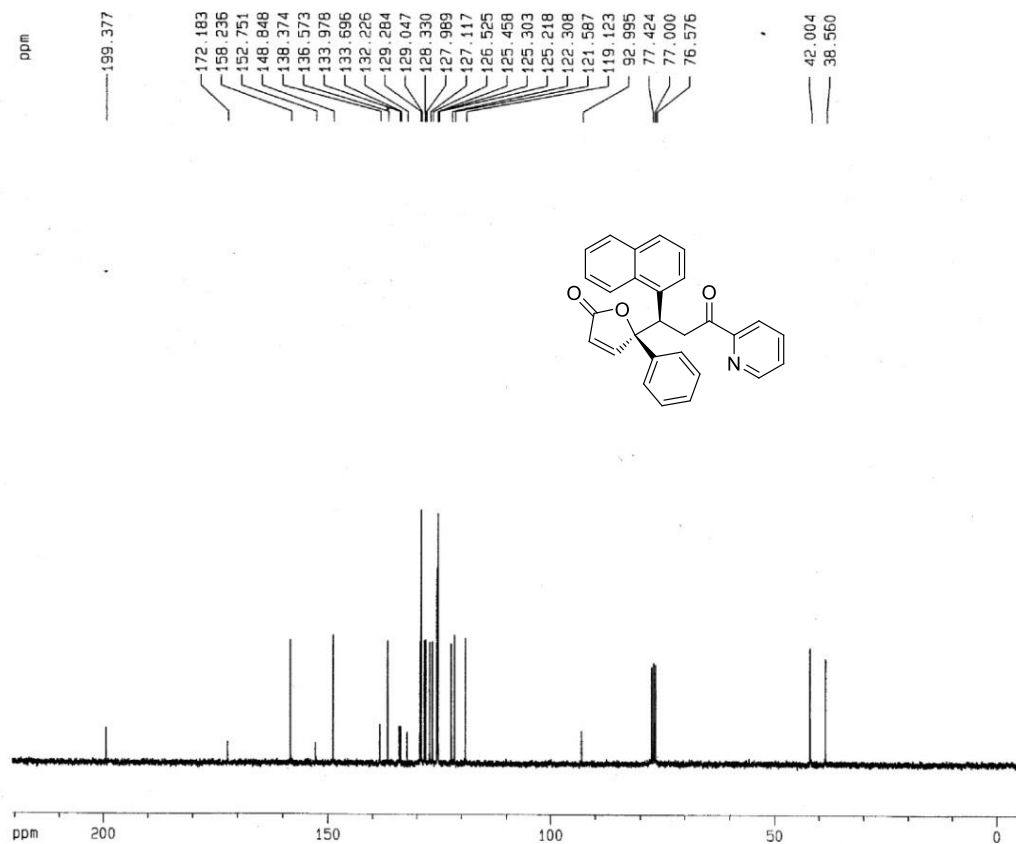

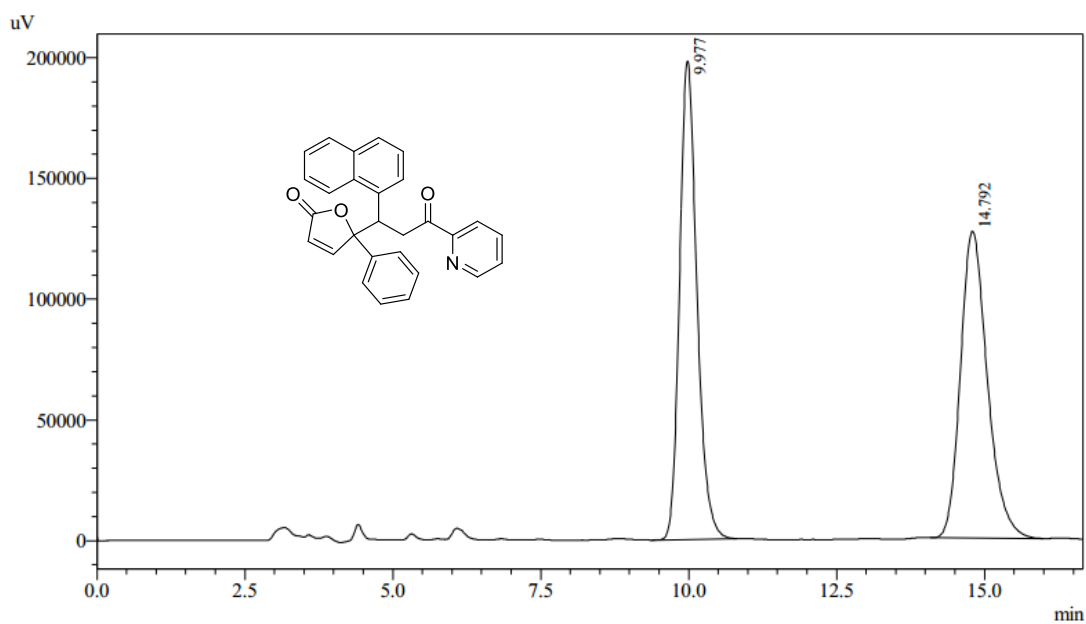

1 Det.A Ch1 / 254nm

Detector A Ch1 254nm

| Peak# | Ret. Time | Area    | Height | Area %  | Height % |
|-------|-----------|---------|--------|---------|----------|
| 1     | 9.977     | 4036476 | 198168 | 50.083  | 60.915   |
| 2     | 14.792    | 4023056 | 127152 | 49.917  | 39.085   |
| Total |           | 8059532 | 325320 | 100.000 | 100.000  |

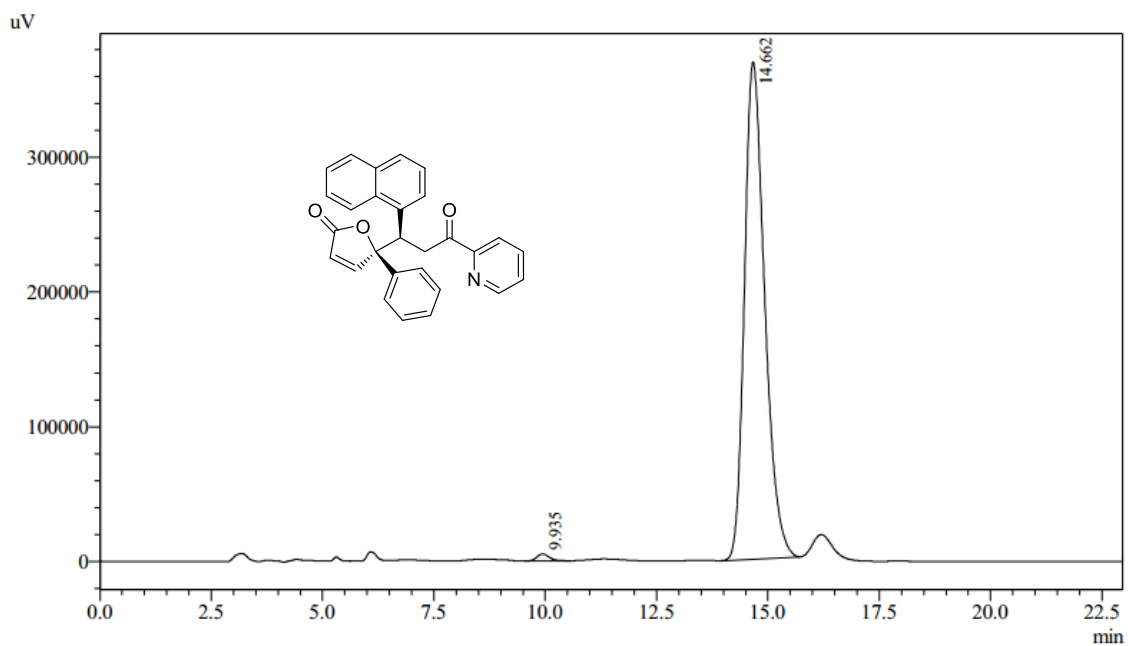

1 Det.A Ch1 / 254nm

Detector A Ch1 254nm

| Peak# | Ret. Time | Area     | Height | Area %  | Height % |
|-------|-----------|----------|--------|---------|----------|
| 1     | 9.935     | 101587   | 5220   | 0.864   | 1.394    |
| 2     | 14.662    | 11650871 | 369252 | 99.136  | 98.606   |
| Total |           | 11752458 | 374472 | 100.000 | 100.000  |

**<sup>1</sup>H NMR, <sup>13</sup>C NMR and HPLC of 3p**

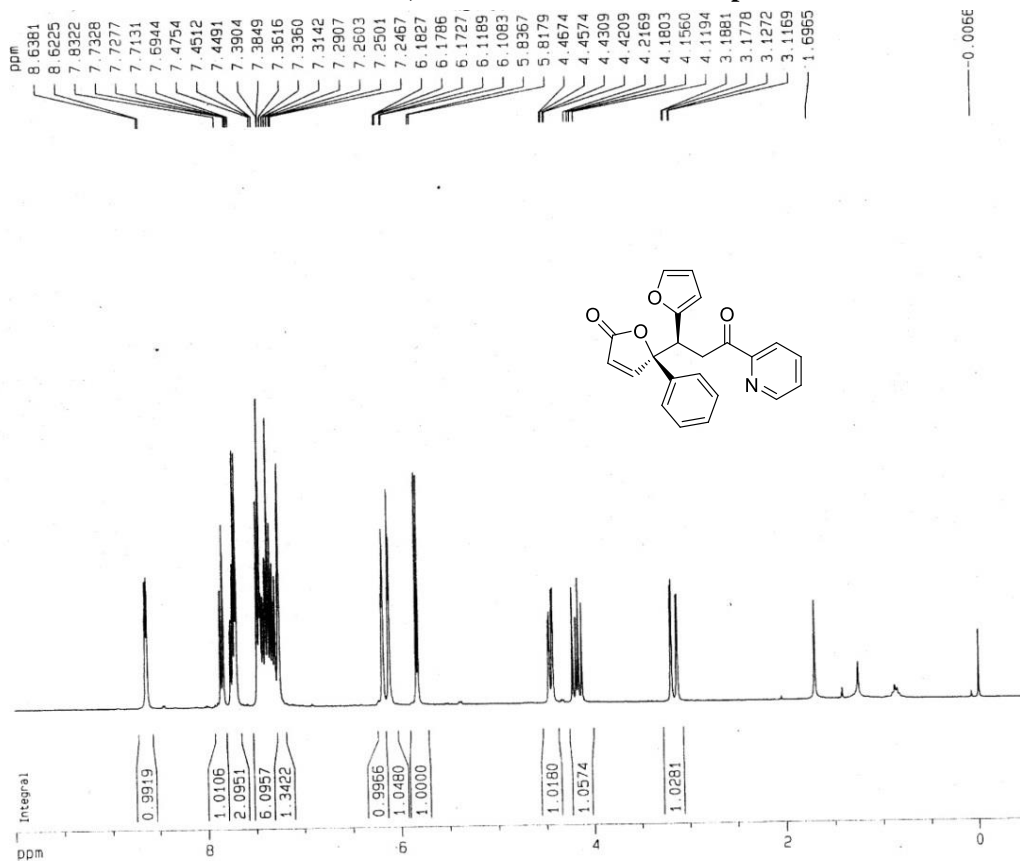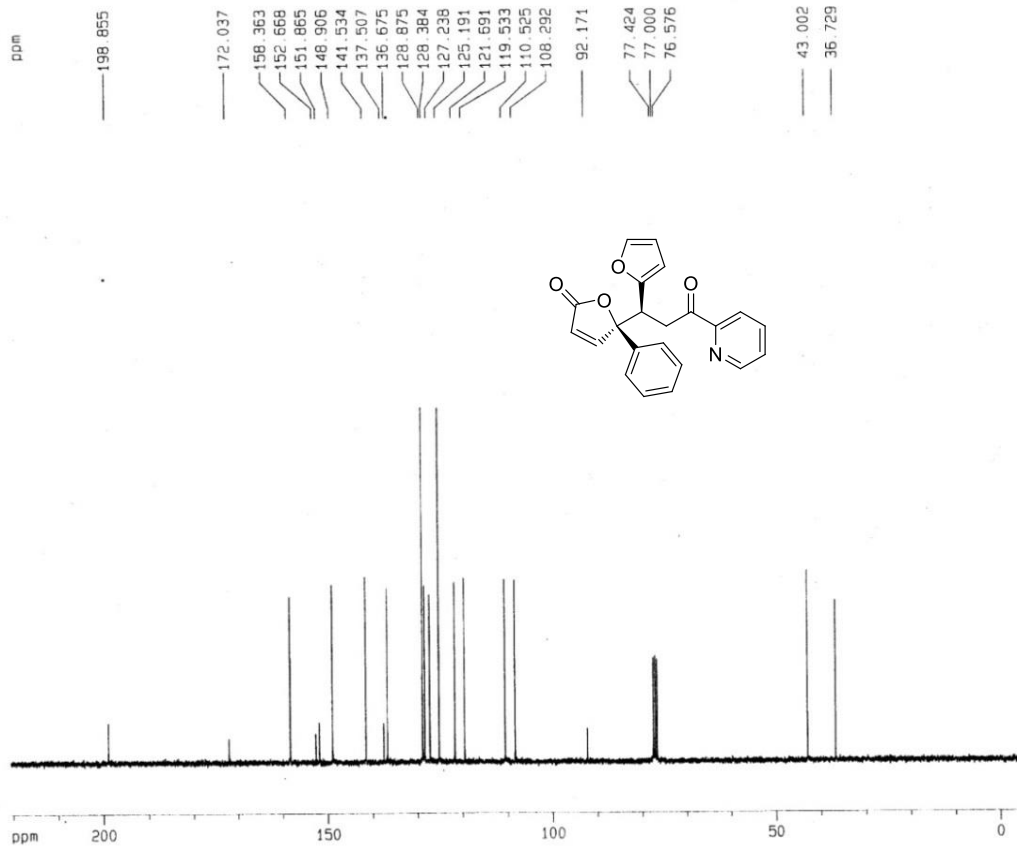

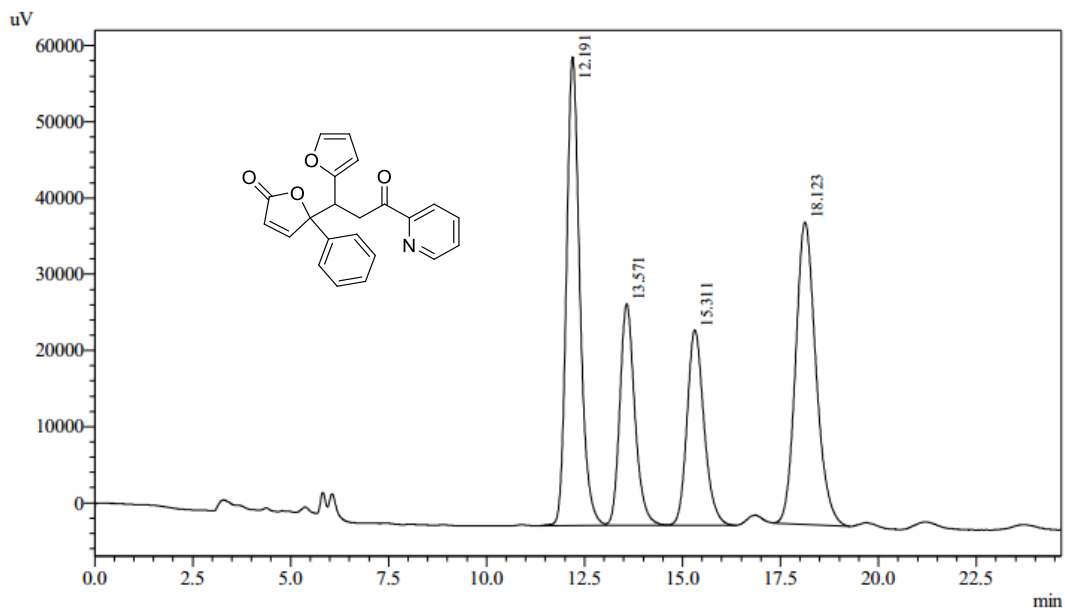

1 Det.A Ch1 / 254nm

Detector A Ch1 254nm

| Peak# | Ret. Time | Area    | Height | Area %  | Height % |
|-------|-----------|---------|--------|---------|----------|
| 1     | 12.191    | 1462425 | 61517  | 32.923  | 39.447   |
| 2     | 13.571    | 776434  | 29113  | 17.480  | 18.668   |
| 3     | 15.311    | 775069  | 25657  | 17.449  | 16.452   |
| 4     | 18.123    | 1427998 | 39662  | 32.148  | 25.433   |
| Total |           | 4441926 | 155950 | 100.000 | 100.000  |

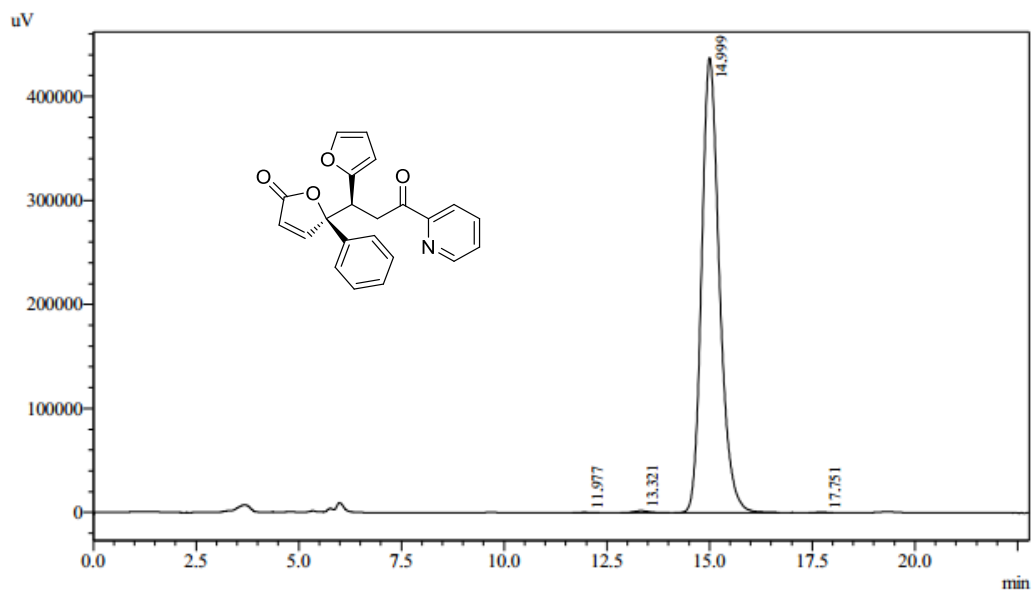

1 Det.A Ch1 / 254nm

Detector A Ch1 254nm

| Peak# | Ret. Time | Area     | Height | Area %  | Height % |
|-------|-----------|----------|--------|---------|----------|
| 1     | 11.977    | 6783     | 381    | 0.051   | 0.087    |
| 2     | 13.321    | 51885    | 2062   | 0.391   | 0.469    |
| 3     | 14.999    | 13197467 | 437509 | 99.536  | 99.412   |
| 4     | 17.751    | 2834     | 145    | 0.021   | 0.033    |
| Total |           | 13258969 | 440097 | 100.000 | 100.000  |

# <sup>1</sup>H NMR, <sup>13</sup>C NMR and HPLC of 3q

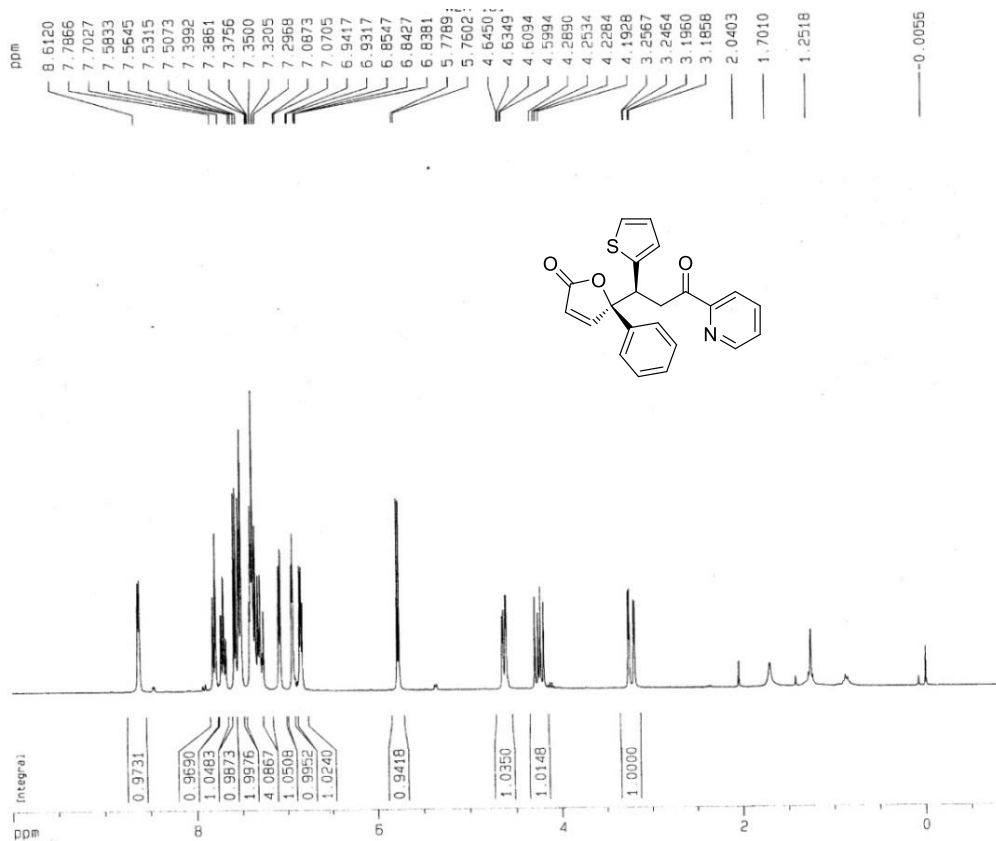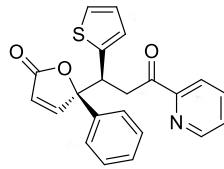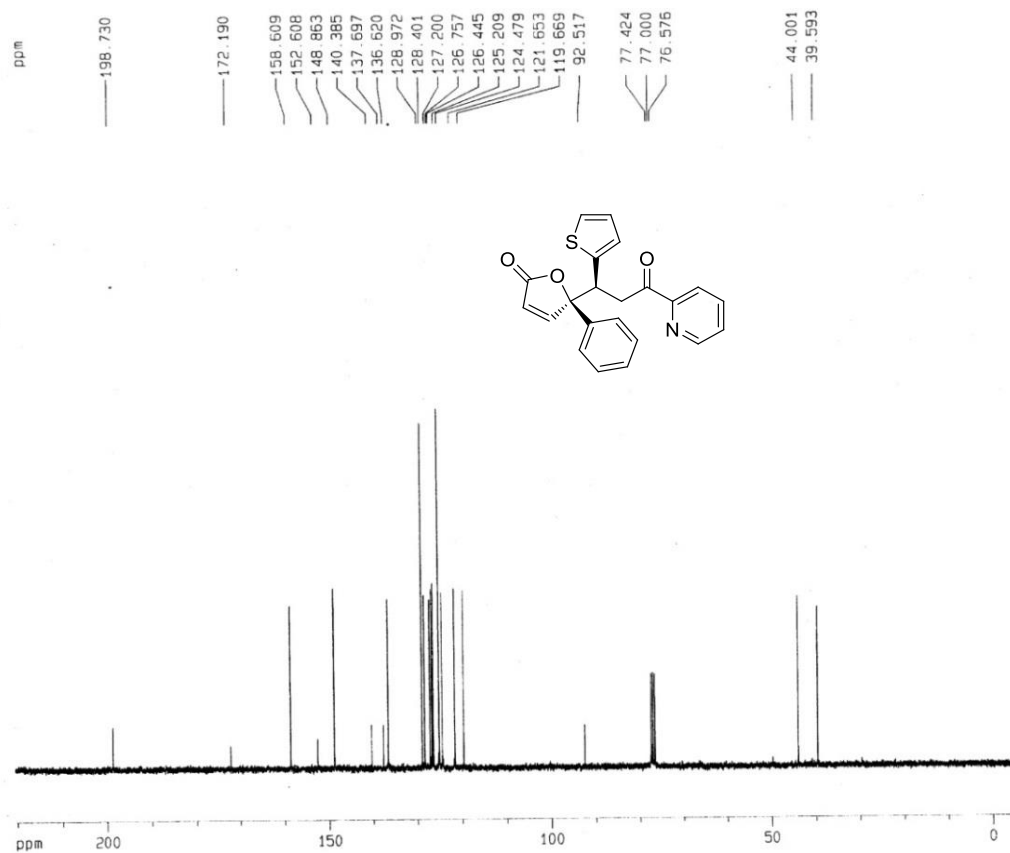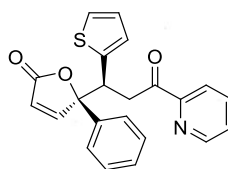

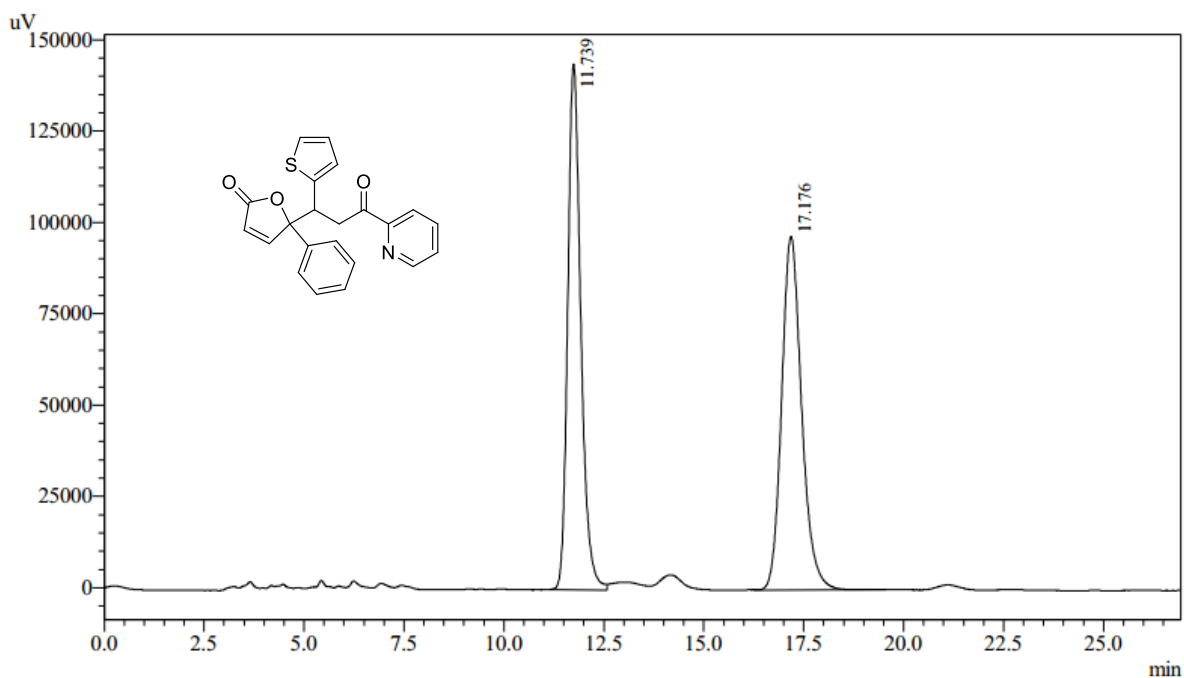

1 Det.A Ch1 / 254nm

Detector A Ch1 254nm

| Peak# | Ret. Time | Area    | Height | Area %  | Height % |
|-------|-----------|---------|--------|---------|----------|
| 1     | 11.739    | 3276221 | 143930 | 49.381  | 59.816   |
| 2     | 17.176    | 3358341 | 96692  | 50.619  | 40.184   |
| Total |           | 6634562 | 240622 | 100.000 | 100.000  |

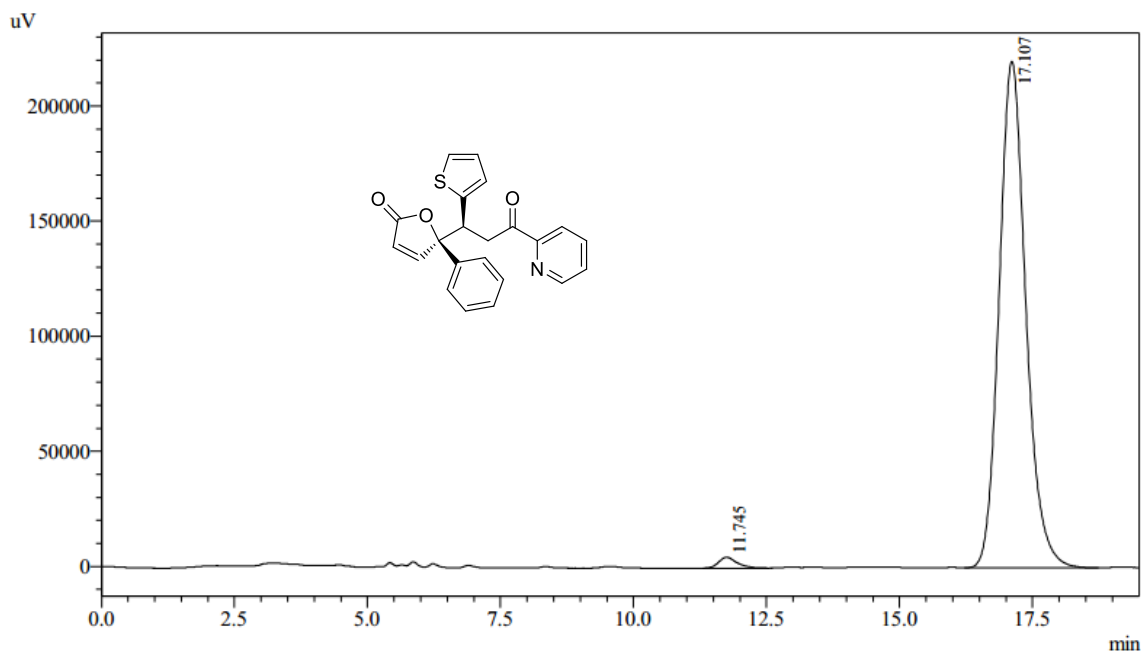

1 Det.A Ch1 / 254nm

Detector A Ch1 254nm

| Peak# | Ret. Time | Area    | Height | Area %  | Height % |
|-------|-----------|---------|--------|---------|----------|
| 1     | 11.745    | 114960  | 4751   | 1.477   | 2.114    |
| 2     | 17.107    | 7670949 | 219948 | 98.523  | 97.886   |
| Total |           | 7785909 | 224699 | 100.000 | 100.000  |



# <sup>1</sup>H NMR, <sup>13</sup>C NMR and HPLC of 3r

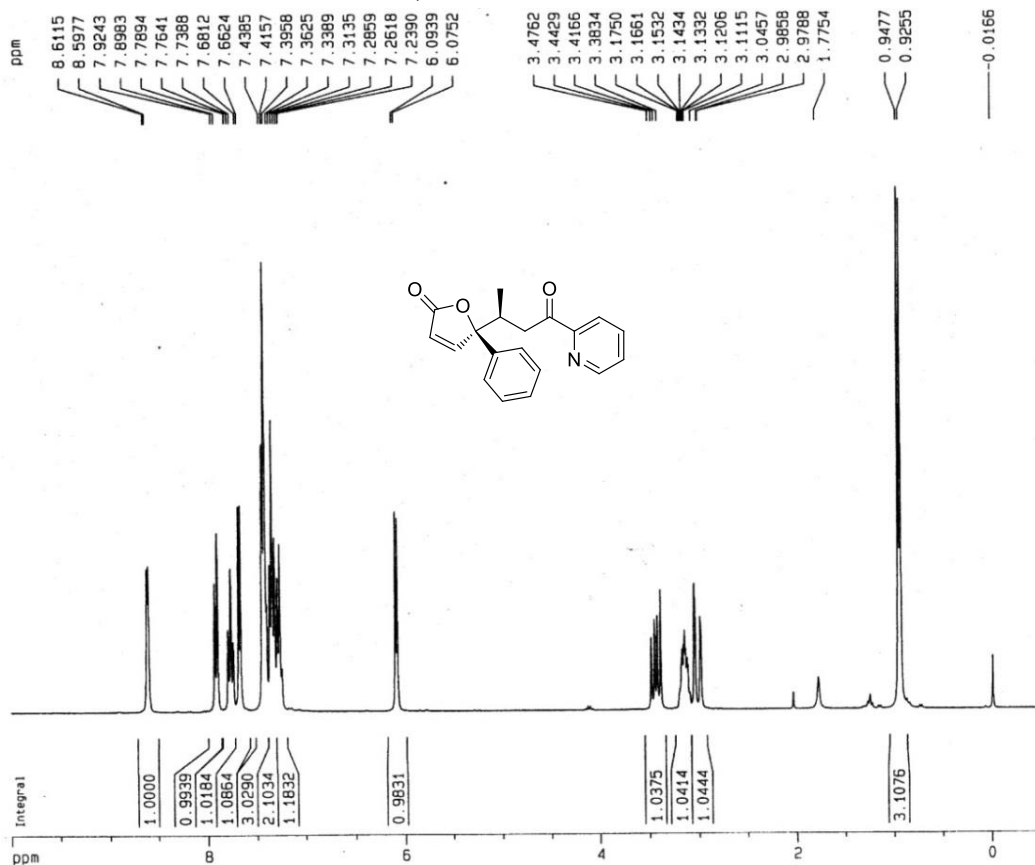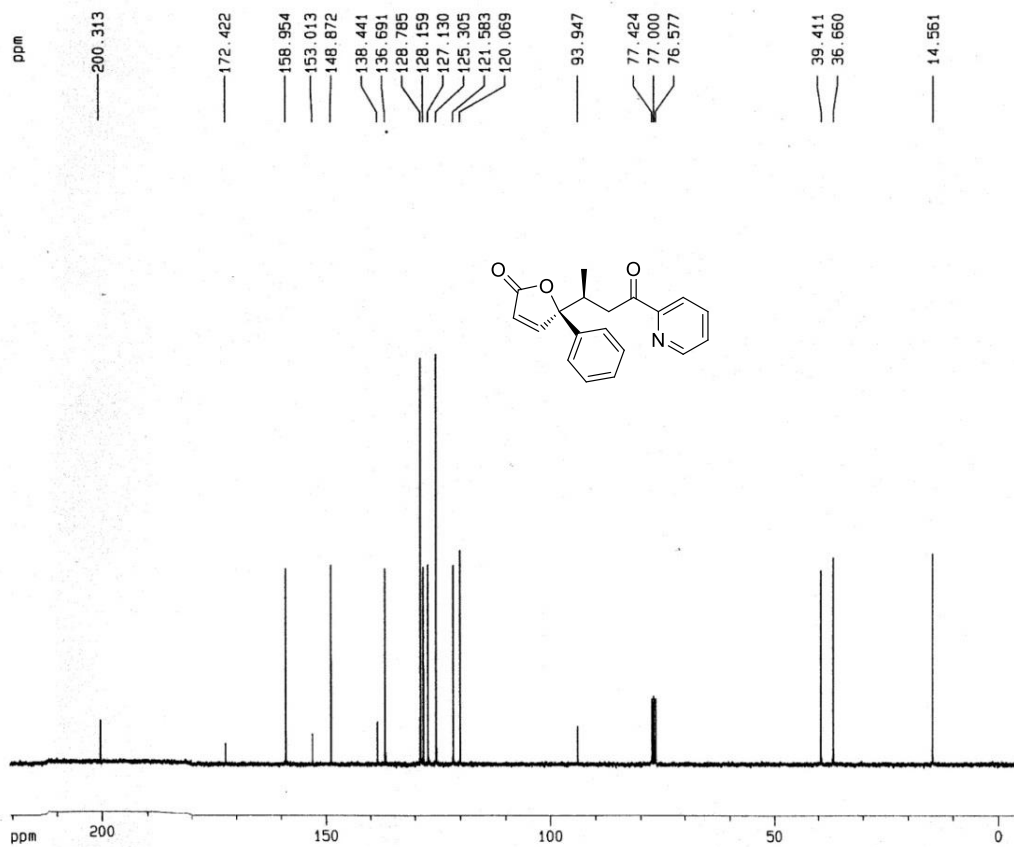

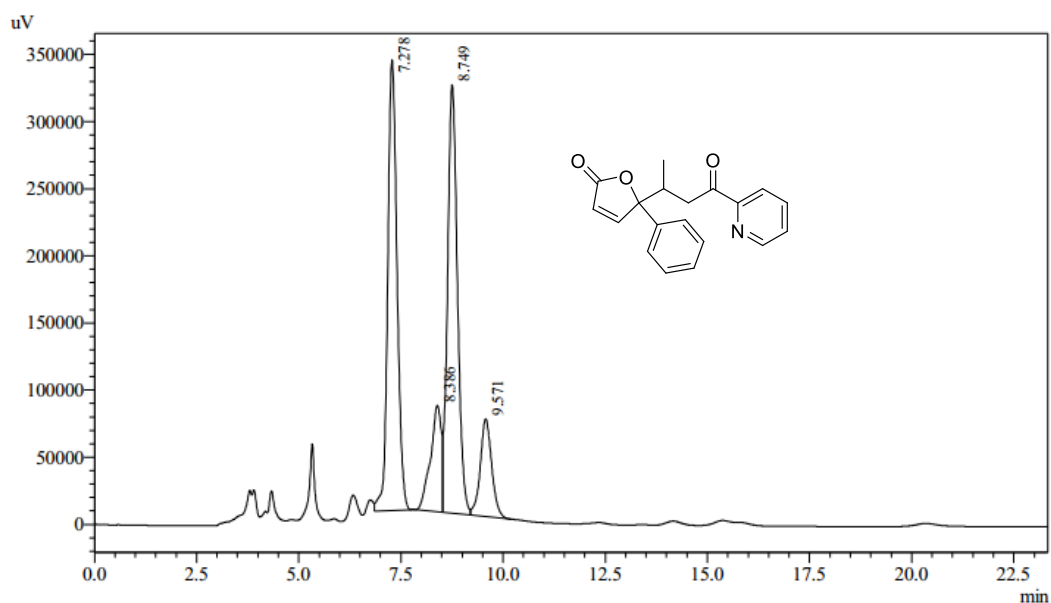

1 Det.A Ch1 / 254nm

Detector A Ch1 254nm

| Peak# | Ret. Time | Area     | Height | Area %  | Height % |
|-------|-----------|----------|--------|---------|----------|
| 1     | 7.278     | 5313495  | 335743 | 39.095  | 41.613   |
| 2     | 8.386     | 1456908  | 79253  | 10.719  | 9.823    |
| 3     | 8.749     | 5398651  | 319052 | 39.722  | 39.544   |
| 4     | 9.571     | 1422191  | 72778  | 10.464  | 9.020    |
| Total |           | 13591245 | 806826 | 100.000 | 100.000  |

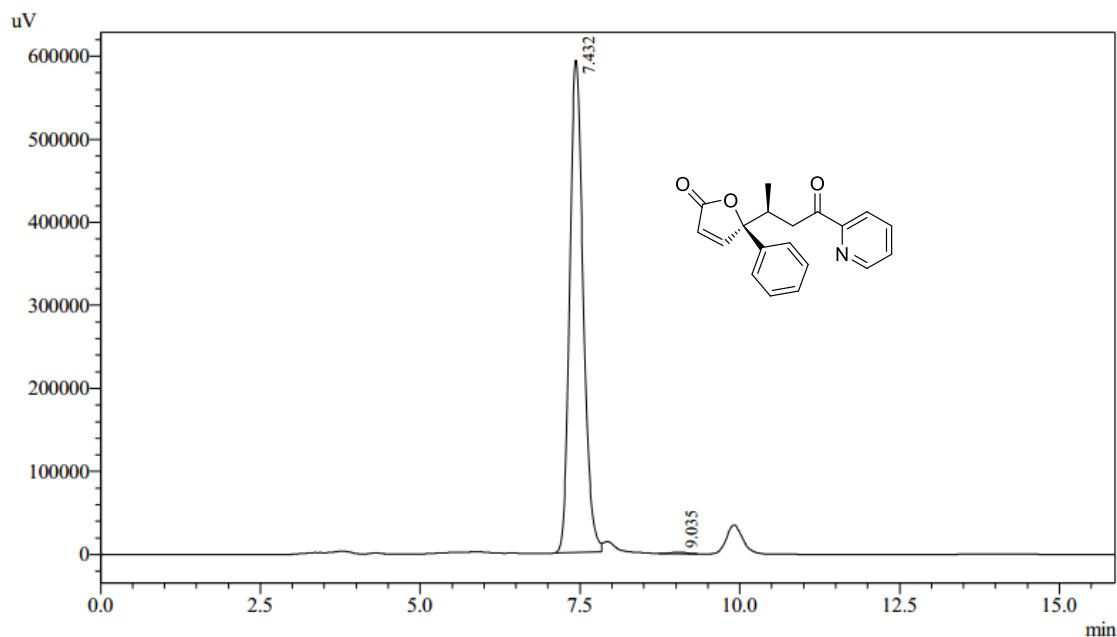

1 Det.A Ch1 / 254nm

Detector A Ch1 254nm

| Peak# | Ret. Time | Area    | Height | Area %  | Height % |
|-------|-----------|---------|--------|---------|----------|
| 1     | 7.432     | 8705035 | 592624 | 99.692  | 99.704   |
| 2     | 9.035     | 26852   | 1759   | 0.308   | 0.296    |
| Total |           | 8731887 | 594384 | 100.000 | 100.000  |

<sup>1</sup>H NMR, <sup>13</sup>C NMR and HPLC of 3s

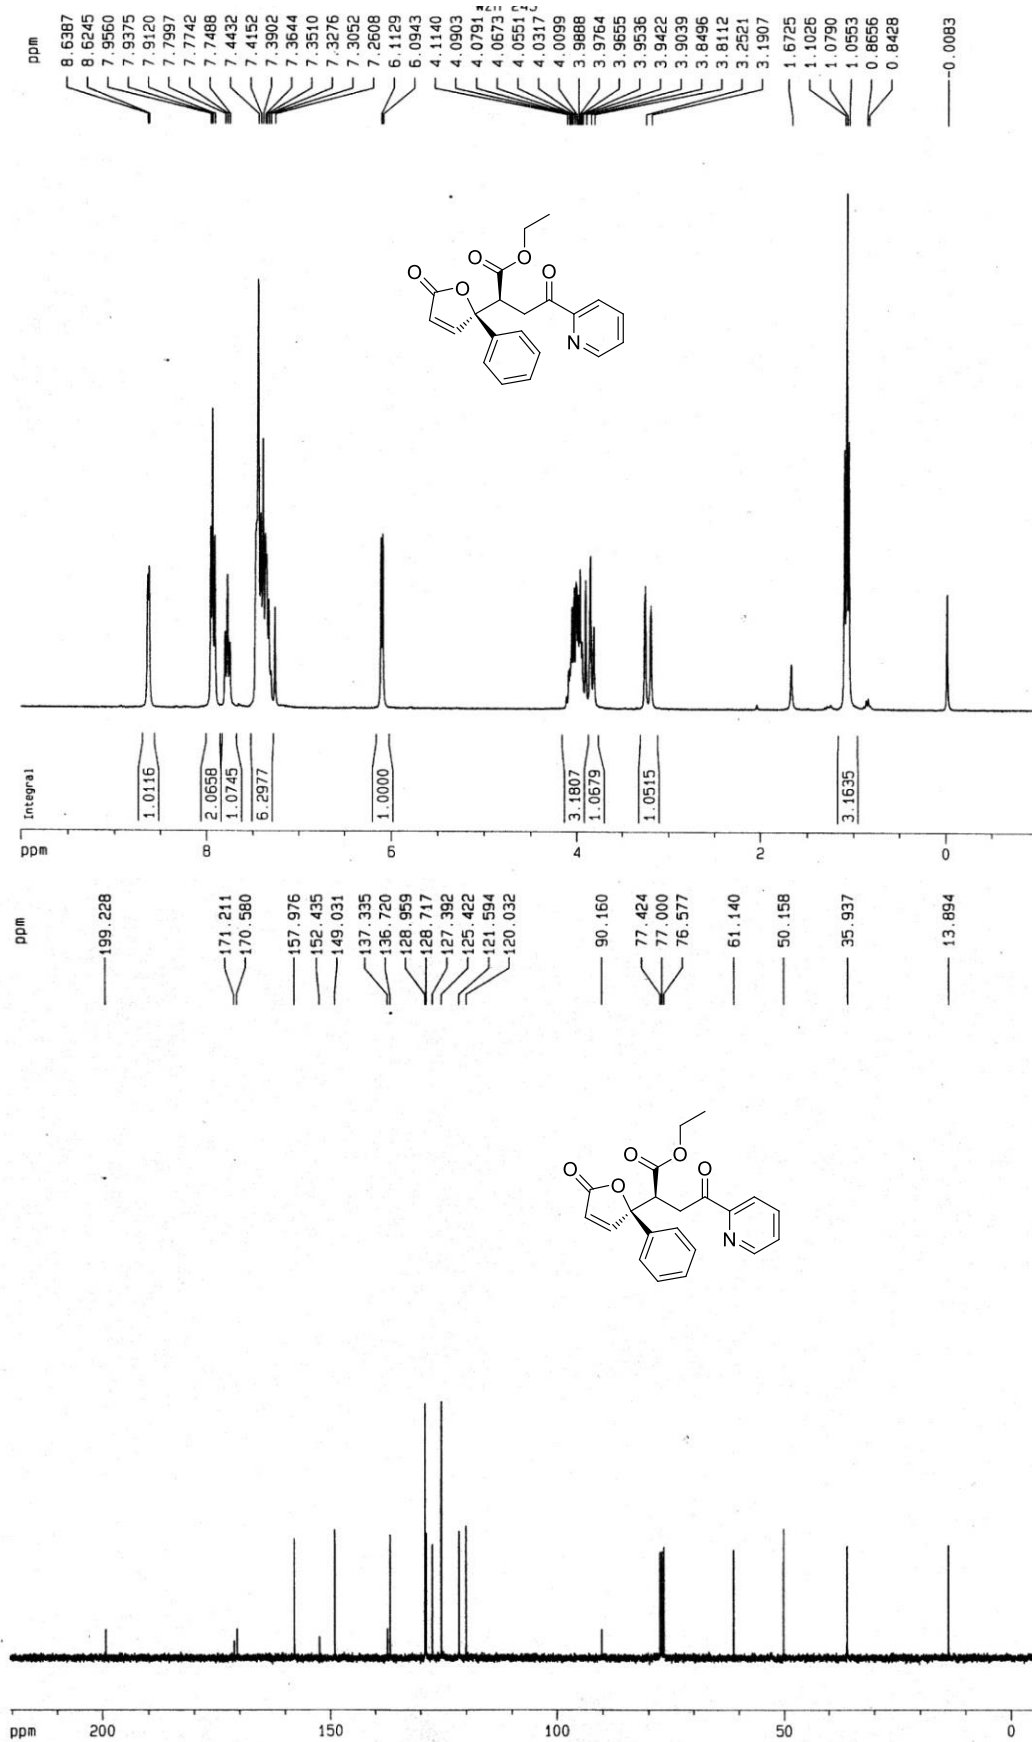

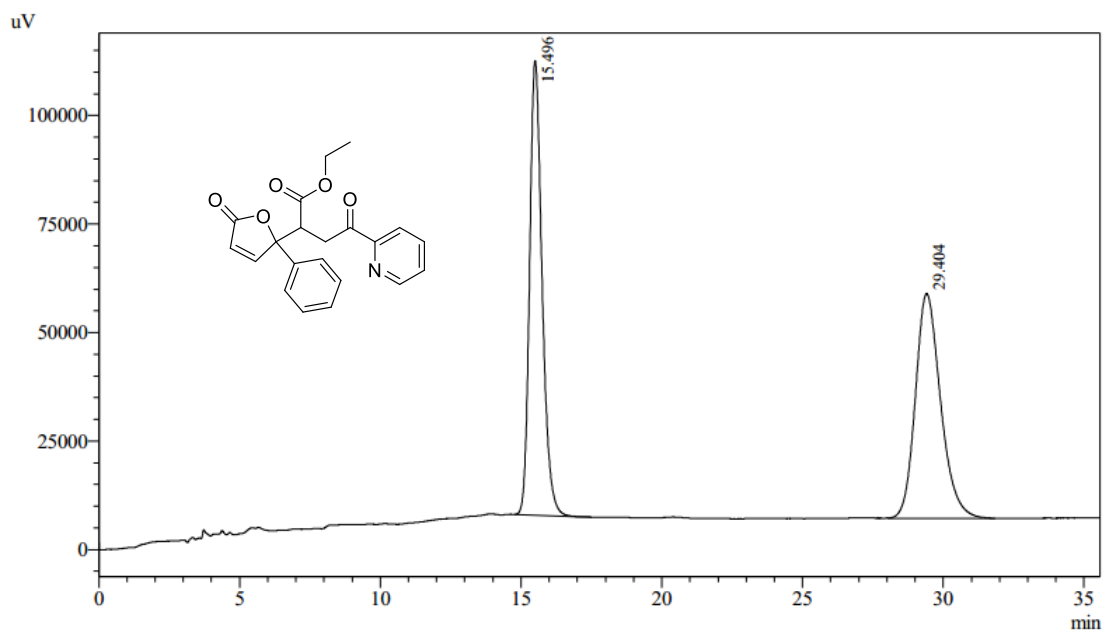

1 Det.A Ch1 / 254nm

Detector A Ch1 254nm

| Peak# | Ret. Time | Area    | Height | Area %  | Height % |
|-------|-----------|---------|--------|---------|----------|
| 1     | 15.496    | 3219035 | 104720 | 49.968  | 66.923   |
| 2     | 29.404    | 3223190 | 51759  | 50.032  | 33.077   |
| Total |           | 6442224 | 156478 | 100.000 | 100.000  |

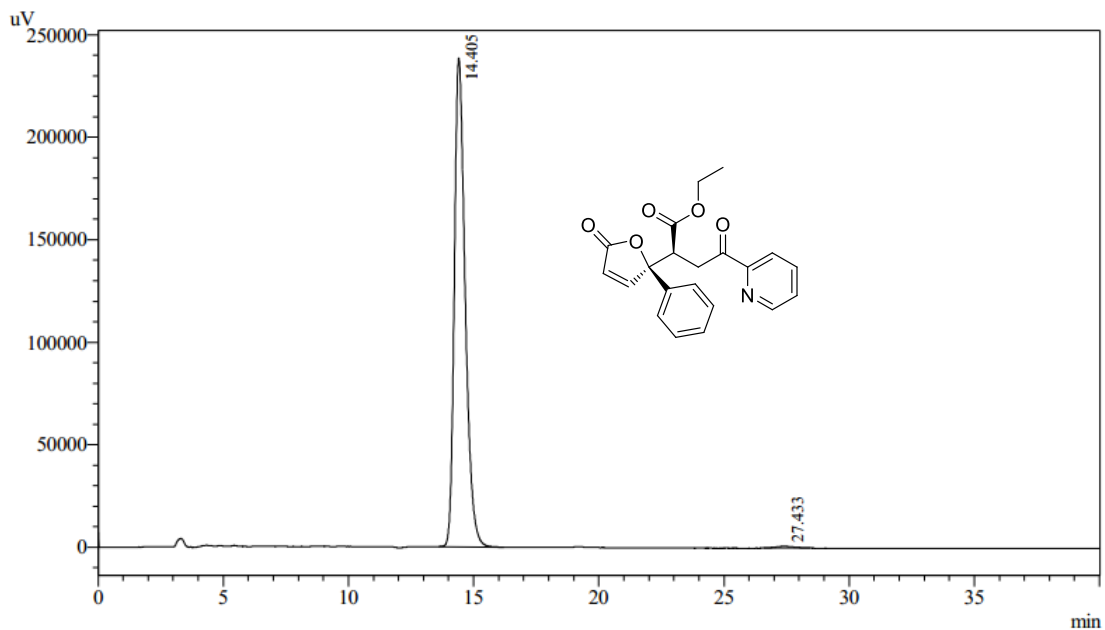

1 Det.A Ch1 / 254nm

Detector A Ch1 254nm

| Peak# | Ret. Time | Area    | Height | Area %  | Height % |
|-------|-----------|---------|--------|---------|----------|
| 1     | 14.405    | 7198495 | 238431 | 99.362  | 99.643   |
| 2     | 27.433    | 46195   | 853    | 0.638   | 0.357    |
| Total |           | 7244691 | 239284 | 100.000 | 100.000  |

# <sup>1</sup>H NMR, <sup>13</sup>C NMR and HPLC of 3t

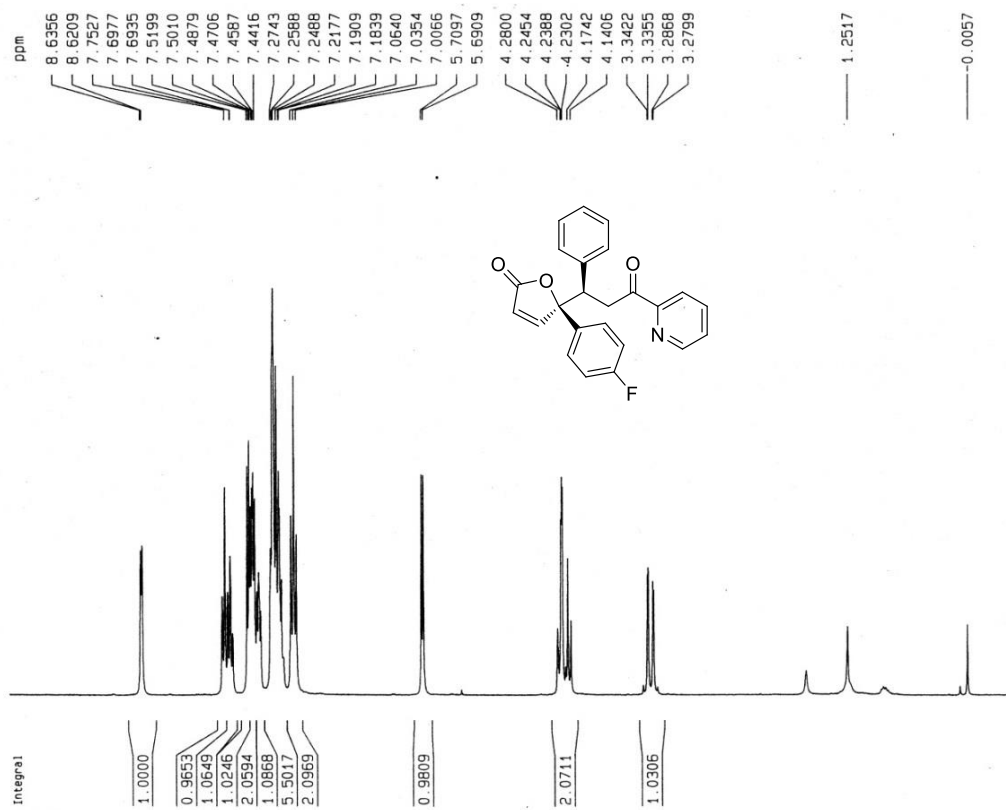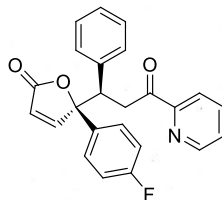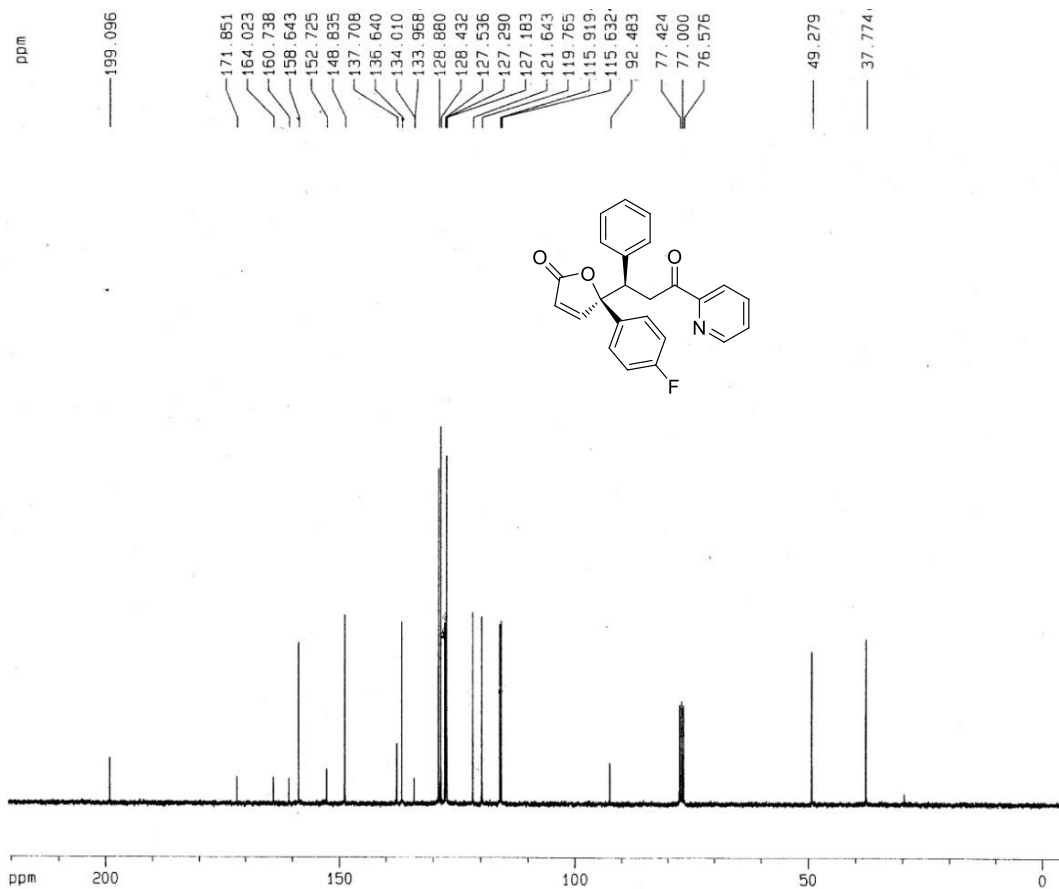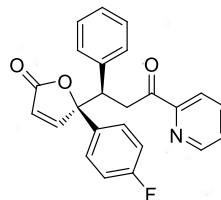

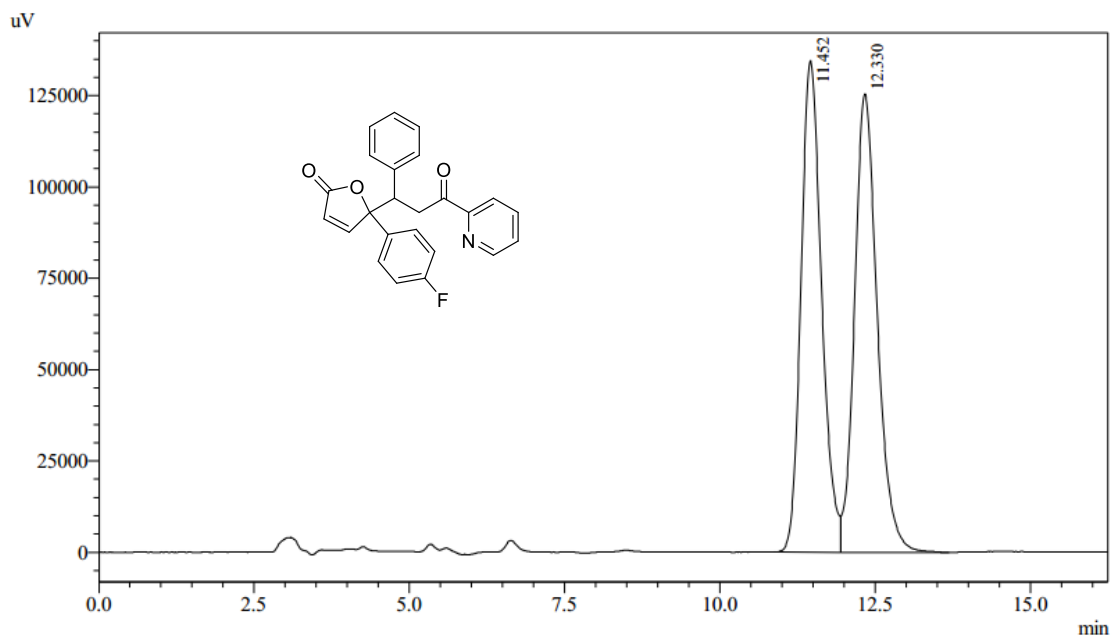

1 Det.A Ch1 / 254nm

Detector A Ch1 254nm

| Peak# | Ret. Time | Area    | Height | Area %  | Height % |
|-------|-----------|---------|--------|---------|----------|
| 1     | 11.452    | 3109893 | 134580 | 49.352  | 51.762   |
| 2     | 12.330    | 3191567 | 125417 | 50.648  | 48.238   |
| Total |           | 6301460 | 259998 | 100.000 | 100.000  |

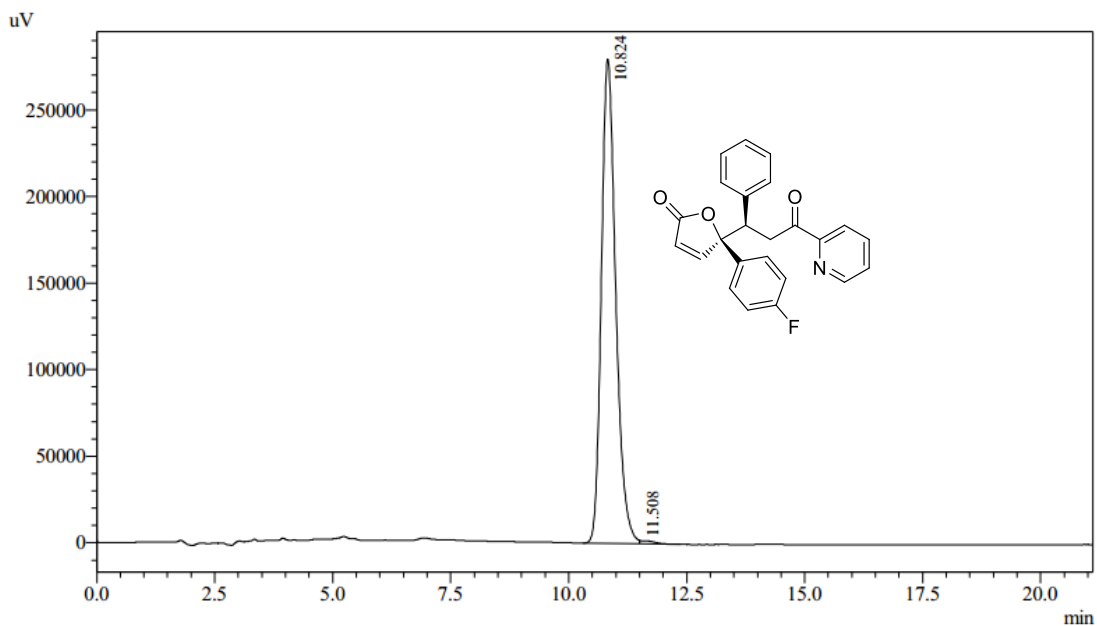

1 Det.A Ch1 / 254nm

Detector A Ch1 254nm

| Peak# | Ret. Time | Area    | Height | Area %  | Height % |
|-------|-----------|---------|--------|---------|----------|
| 1     | 10.824    | 5918959 | 279764 | 99.321  | 99.289   |
| 2     | 11.508    | 40474   | 2002   | 0.679   | 0.711    |
| Total |           | 5959432 | 281766 | 100.000 | 100.000  |

<sup>1</sup>H NMR, <sup>13</sup>C NMR and HPLC of 3u

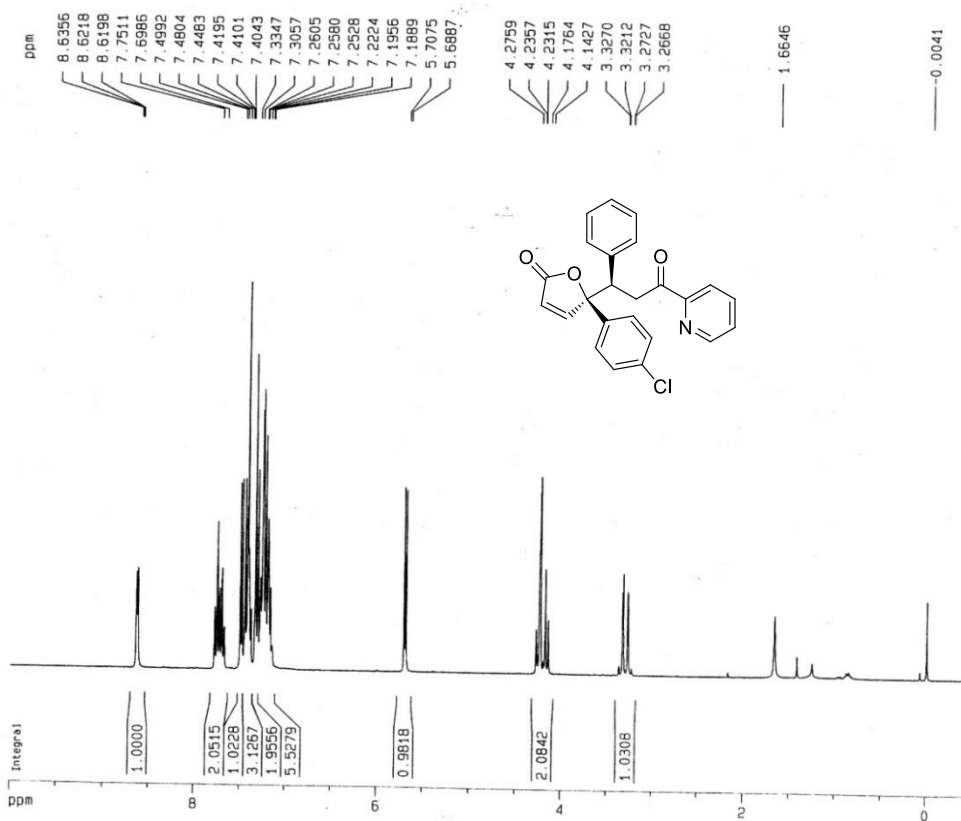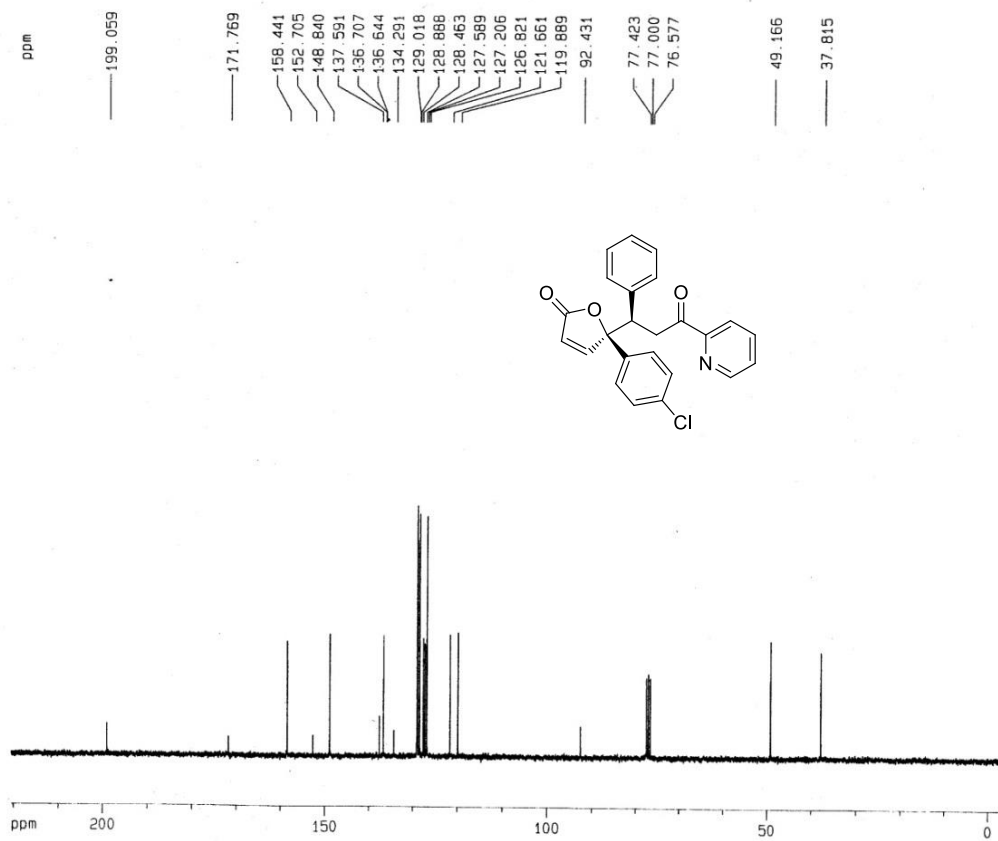

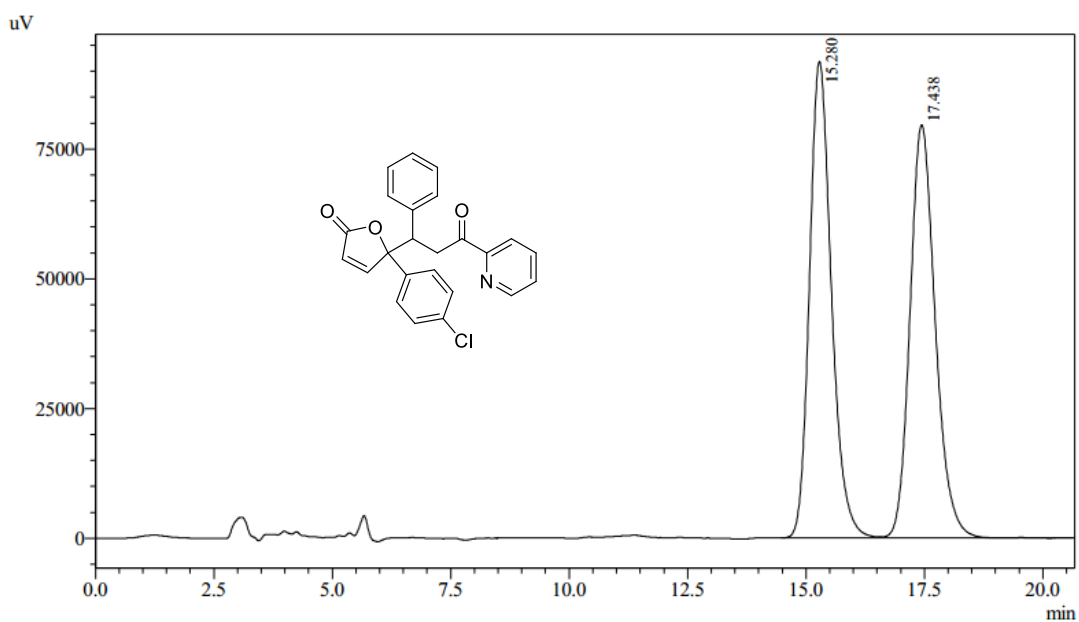

1 Det.A Ch1 / 254nm

Detector A Ch1 254nm

| Peak# | Ret. Time | Area    | Height | Area %  | Height % |
|-------|-----------|---------|--------|---------|----------|
| 1     | 15.280    | 2958275 | 91873  | 50.018  | 53.569   |
| 2     | 17.438    | 2956115 | 79629  | 49.982  | 46.431   |
| Total |           | 5914390 | 171502 | 100.000 | 100.000  |

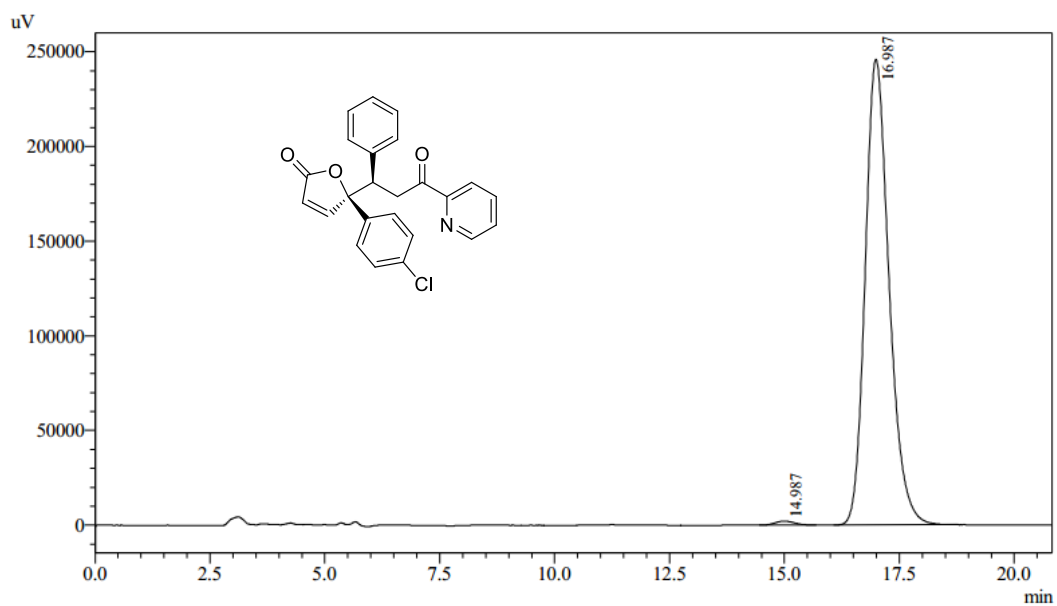

1 Det.A Ch1 / 254nm

Detector A Ch1 254nm

| Peak# | Ret. Time | Area    | Height | Area %  | Height % |
|-------|-----------|---------|--------|---------|----------|
| 1     | 14.987    | 63748   | 2158   | 0.712   | 0.870    |
| 2     | 16.987    | 8893210 | 246017 | 99.288  | 99.130   |
| Total |           | 8956958 | 248175 | 100.000 | 100.000  |



# <sup>1</sup>H NMR, <sup>13</sup>C NMR and HPLC of 3v

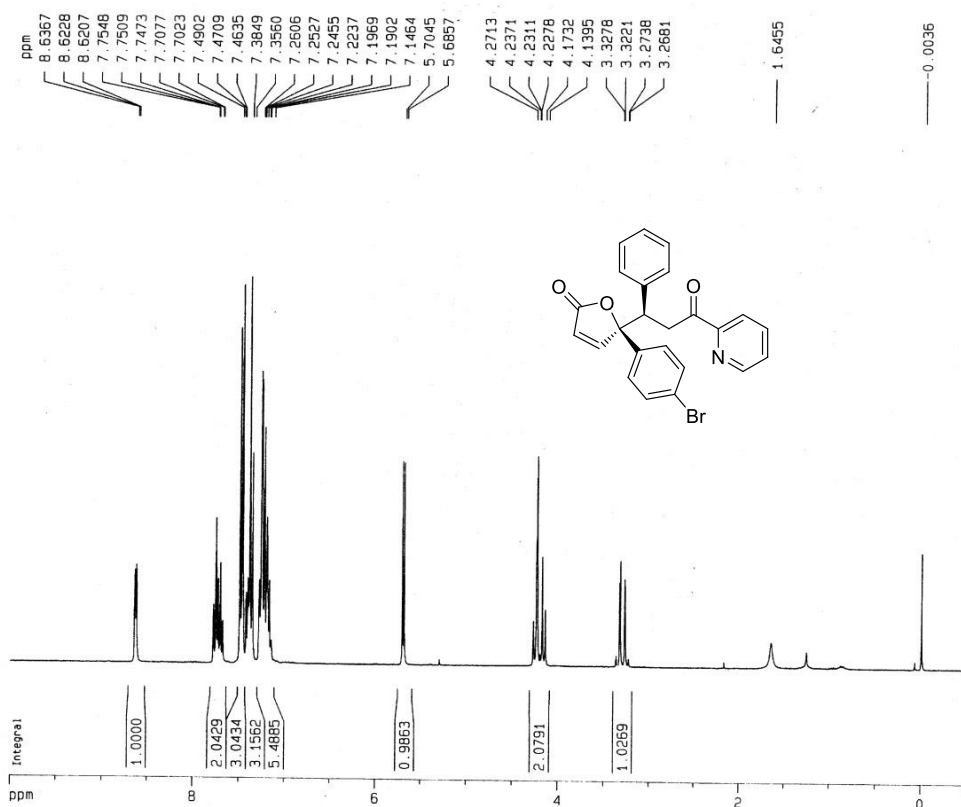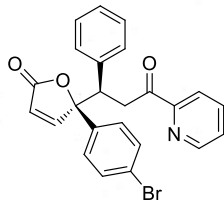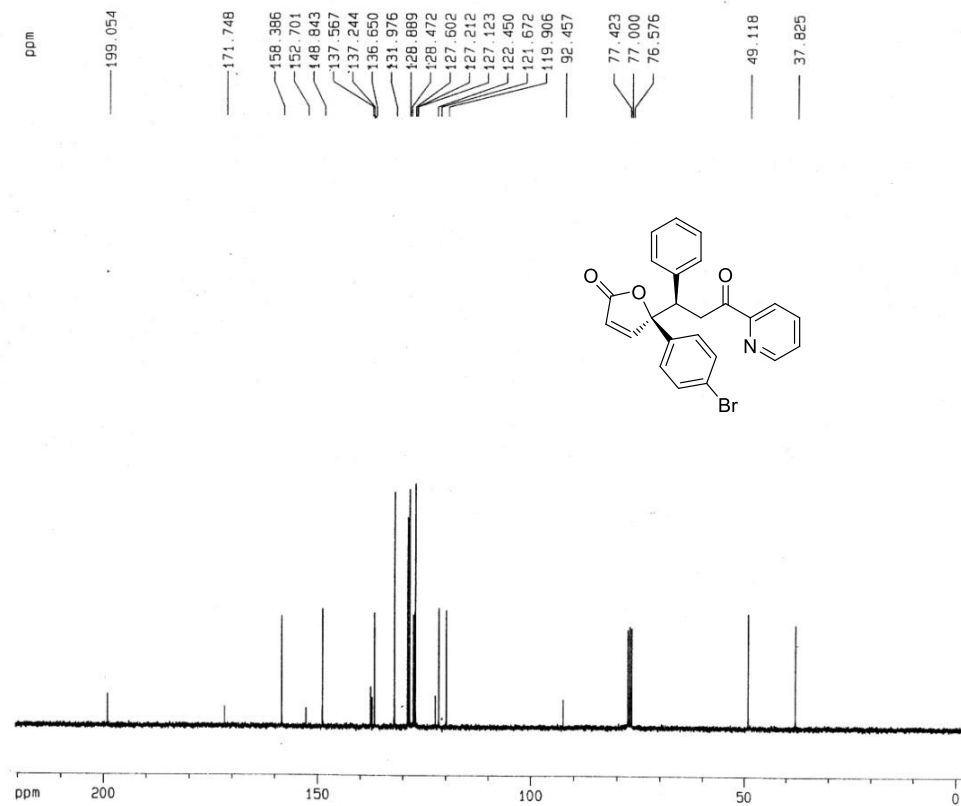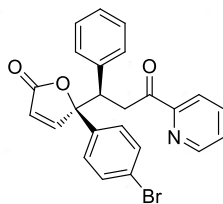

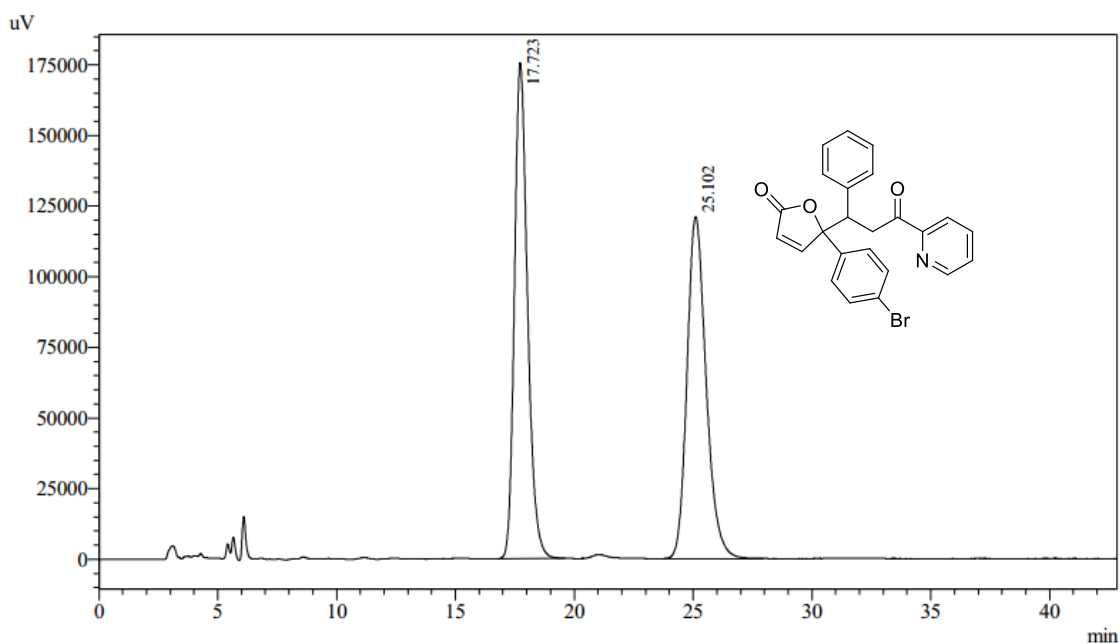

1 Det.A Ch1 / 254nm

Detector A Ch1 254nm

| Peak# | Ret. Time | Area     | Height | Area %  | Height % |
|-------|-----------|----------|--------|---------|----------|
| 1     | 17.723    | 6728327  | 175579 | 49.892  | 59.191   |
| 2     | 25.102    | 6757497  | 121054 | 50.108  | 40.809   |
| Total |           | 13485824 | 296633 | 100.000 | 100.000  |

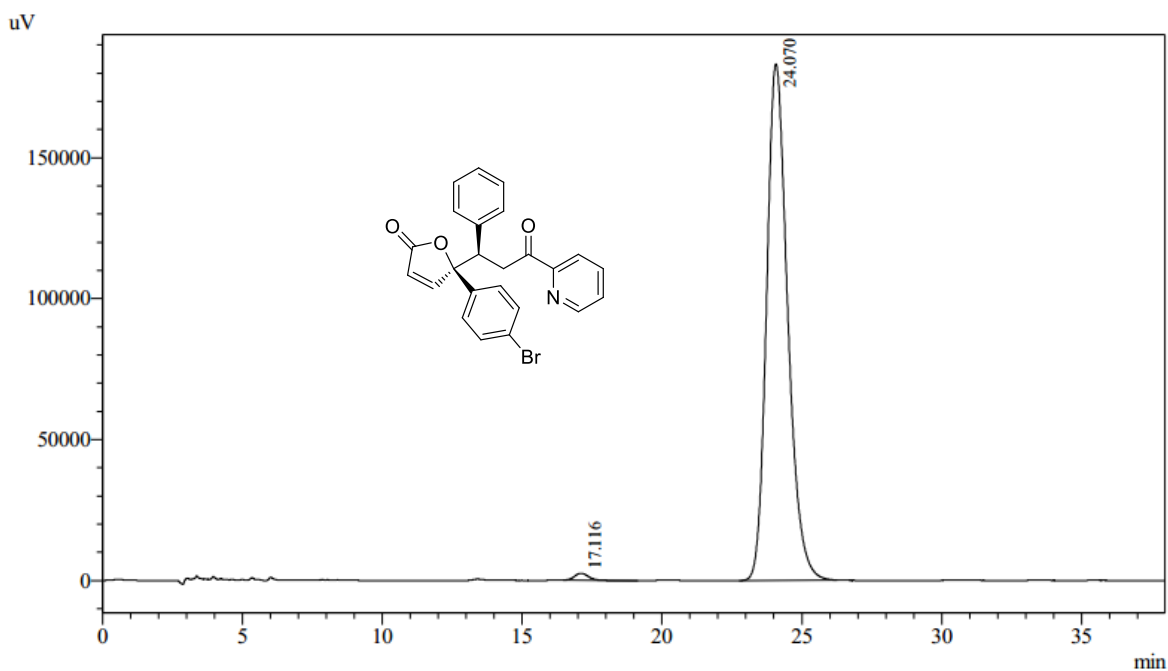

1 Det.A Ch1 / 254nm

Detector A Ch1 254nm

| Peak# | Ret. Time | Area    | Height | Area %  | Height % |
|-------|-----------|---------|--------|---------|----------|
| 1     | 17.116    | 78543   | 2438   | 0.812   | 1.313    |
| 2     | 24.070    | 9598693 | 183269 | 99.188  | 98.687   |
| Total |           | 9677235 | 185706 | 100.000 | 100.000  |

**<sup>1</sup>H NMR, <sup>13</sup>C NMR and HPLC of 3w**

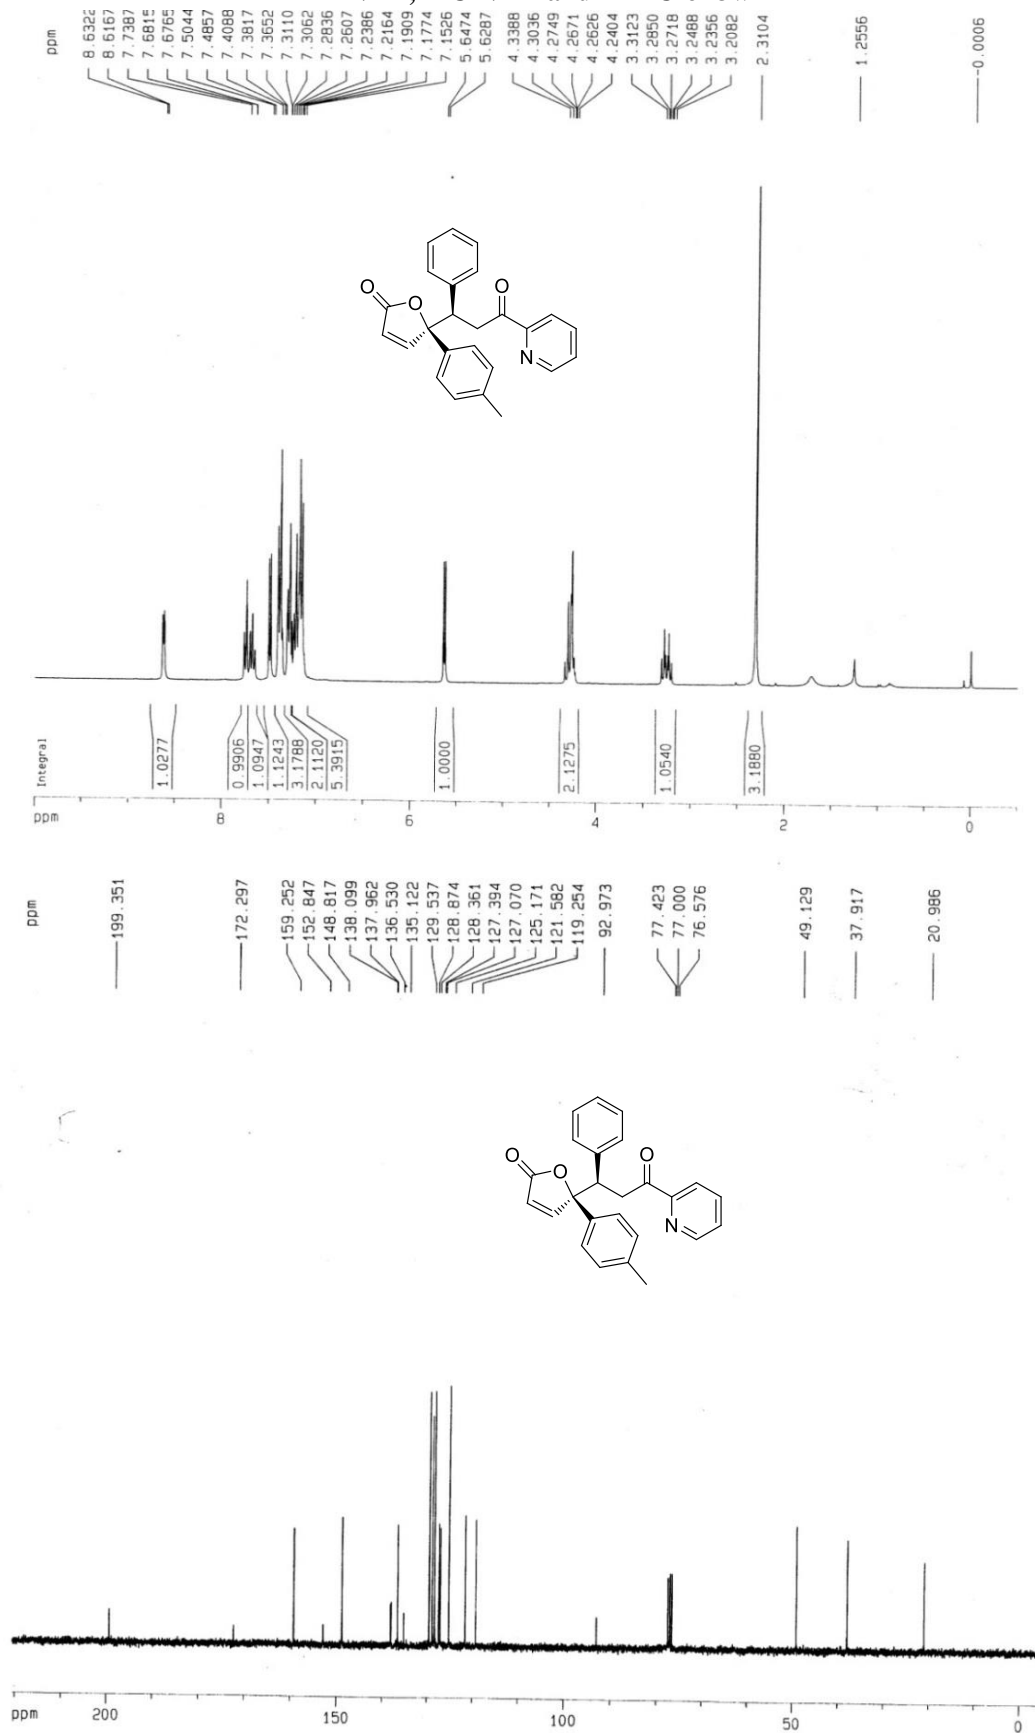

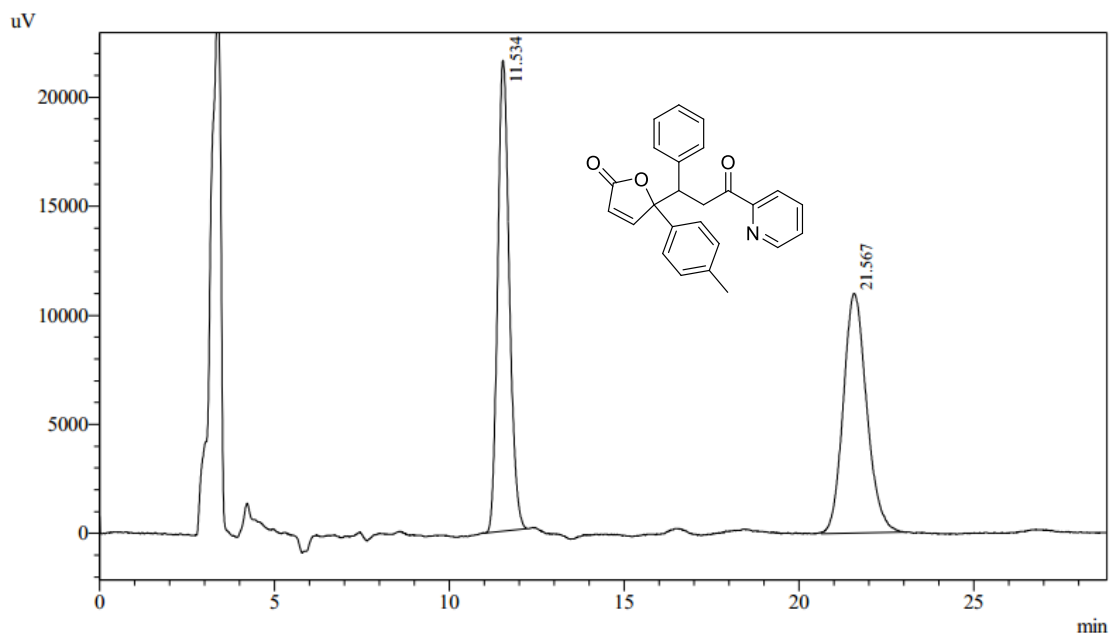

1 Det.A Ch1 / 254nm

Detector A Ch1 254nm

| Peak# | Ret. Time | Area    | Height | Area %  | Height % |
|-------|-----------|---------|--------|---------|----------|
| 1     | 11.534    | 500282  | 21600  | 49.420  | 66.266   |
| 2     | 21.567    | 512022  | 10996  | 50.580  | 33.734   |
| Total |           | 1012304 | 32595  | 100.000 | 100.000  |

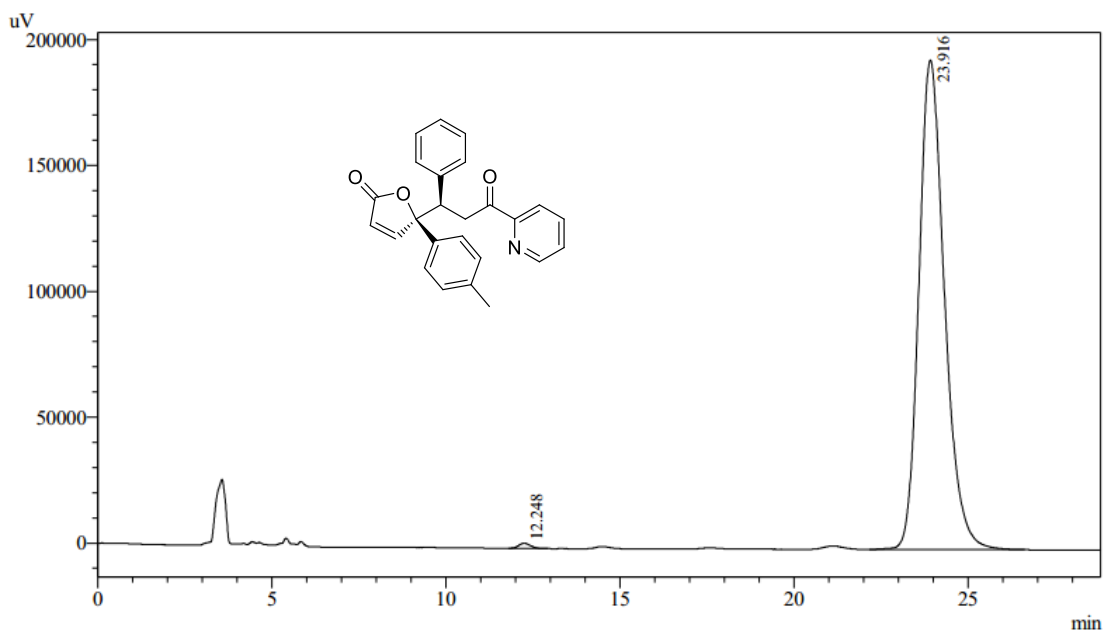

1 Det.A Ch1 / 254nm

Detector A Ch1 254nm

| Peak# | Ret. Time | Area     | Height | Area %  | Height % |
|-------|-----------|----------|--------|---------|----------|
| 1     | 12.248    | 50469    | 2100   | 0.504   | 1.068    |
| 2     | 23.916    | 9960406  | 194478 | 99.496  | 98.932   |
| Total |           | 10010874 | 196578 | 100.000 | 100.000  |

# <sup>1</sup>H NMR, <sup>13</sup>C NMR and HPLC of 3x

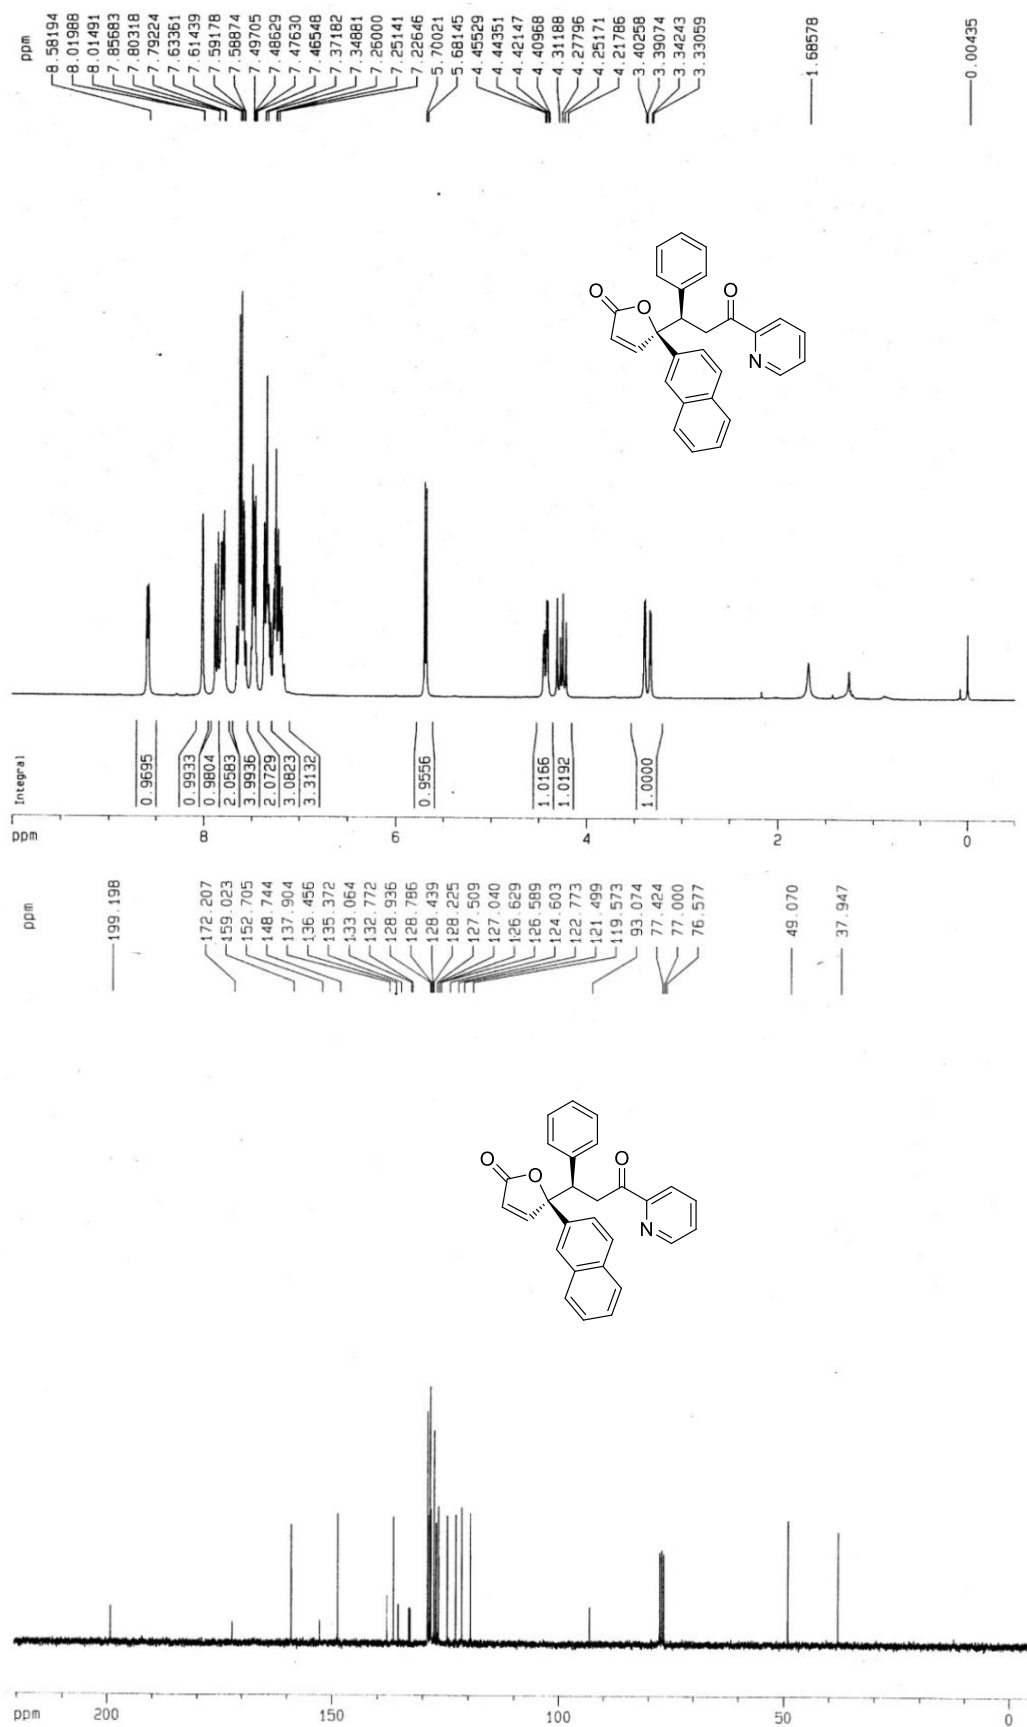

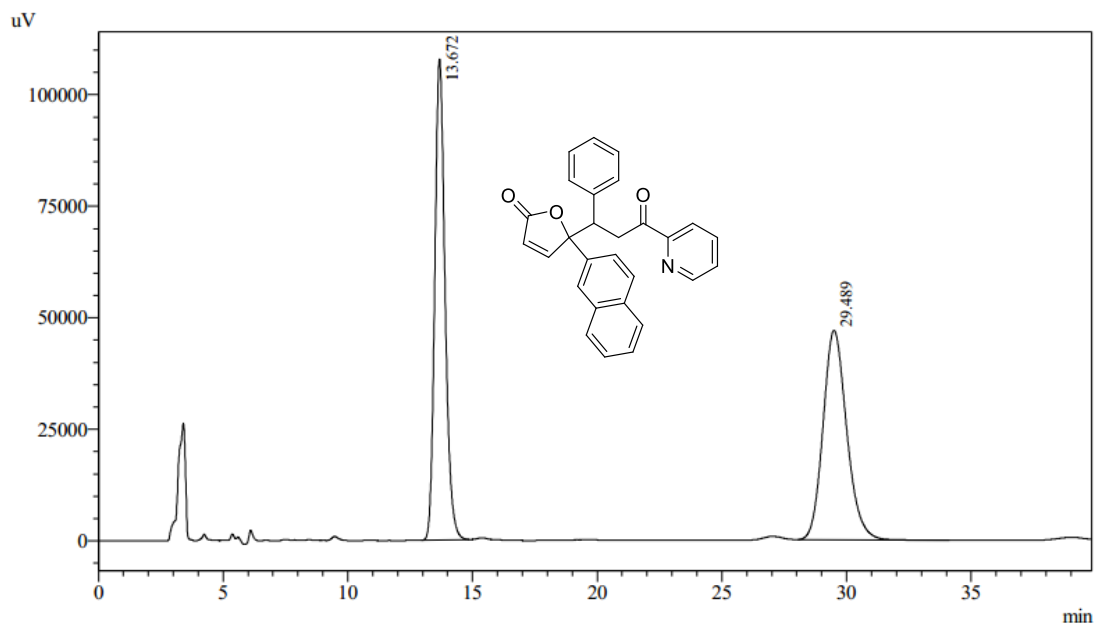

1 Det.A Ch1 / 254nm

Detector A Ch1 254nm

| Peak# | Ret. Time | Area    | Height | Area %  | Height % |
|-------|-----------|---------|--------|---------|----------|
| 1     | 13.672    | 3092731 | 107835 | 49.974  | 69.667   |
| 2     | 29.489    | 3096009 | 46951  | 50.026  | 30.333   |
| Total |           | 6188740 | 154786 | 100.000 | 100.000  |

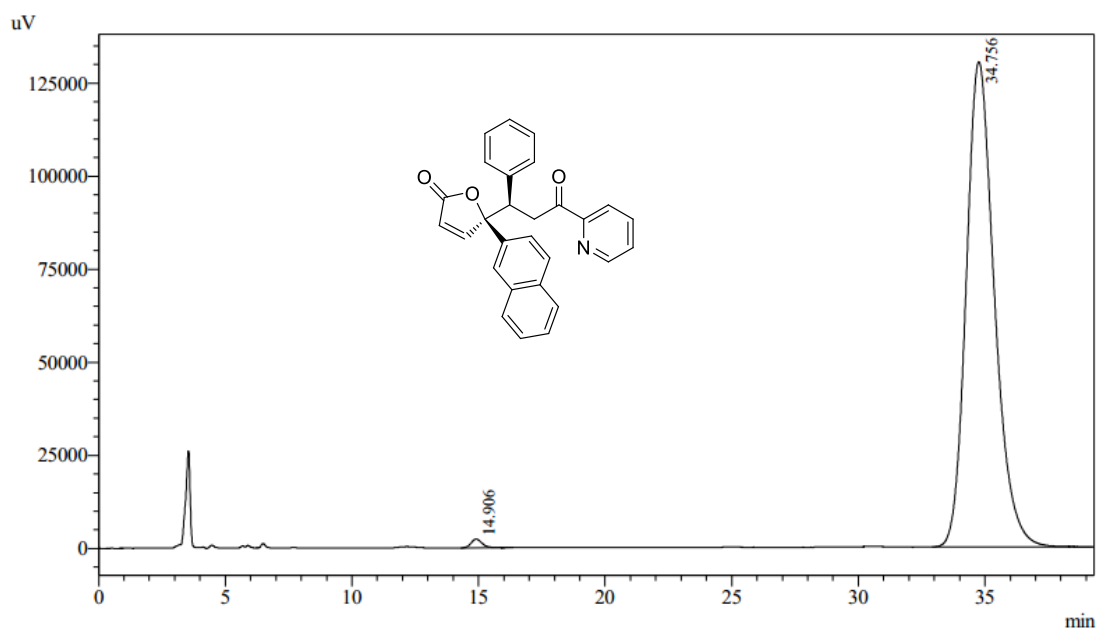

1 Det.A Ch1 / 254nm

Detector A Ch1 254nm

| Peak# | Ret. Time | Area     | Height | Area %  | Height % |
|-------|-----------|----------|--------|---------|----------|
| 1     | 14.906    | 74390    | 2413   | 0.731   | 1.817    |
| 2     | 34.756    | 10096257 | 130375 | 99.269  | 98.183   |
| Total |           | 10170647 | 132788 | 100.000 | 100.000  |

# <sup>1</sup>H NMR, <sup>13</sup>C NMR and HPLC of 4

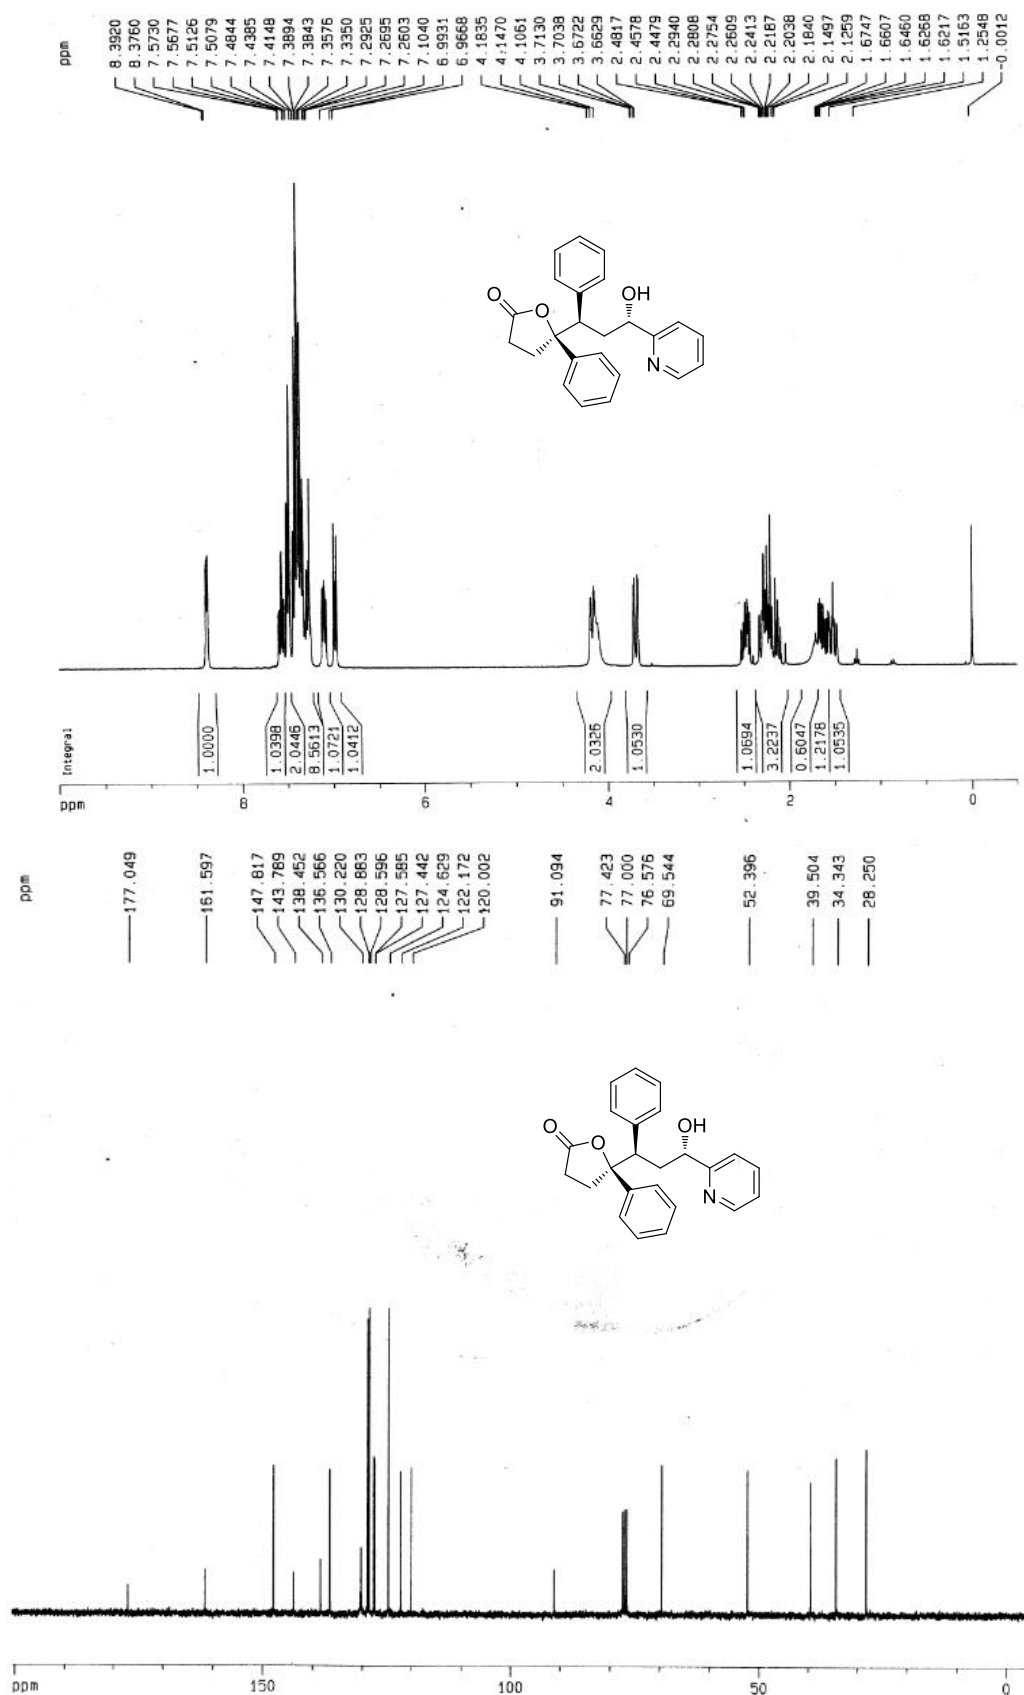

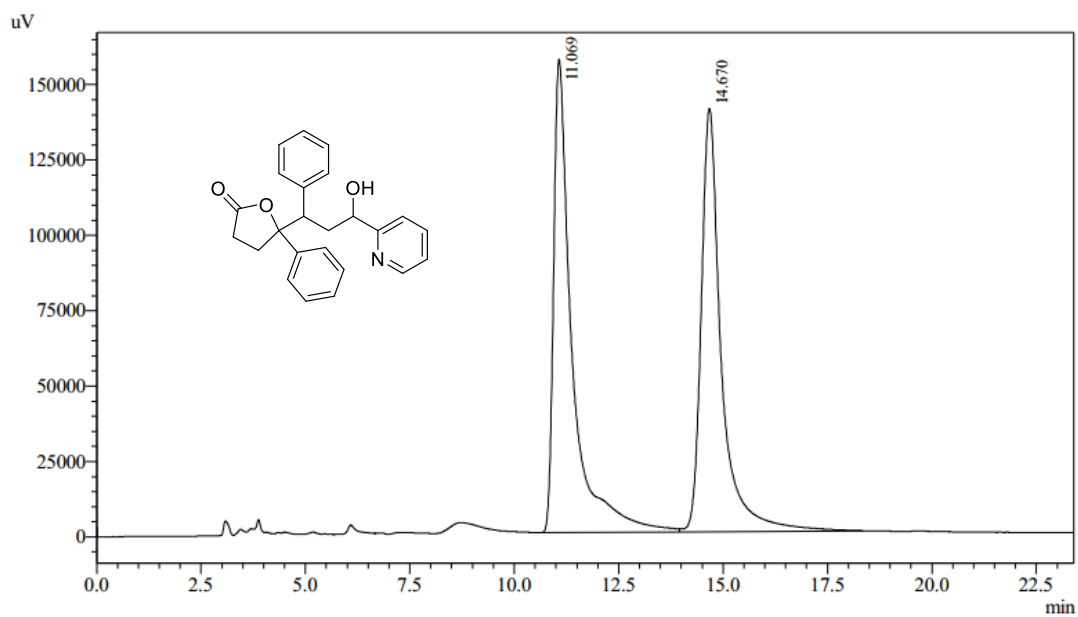

1 Det.A Ch1 / 254nm

Detector A Ch1 254nm

| Peak# | Ret. Time | Area    | Height | Area %  | Height % |
|-------|-----------|---------|--------|---------|----------|
| 1     | 11.069    | 4826836 | 156999 | 50.664  | 52.787   |
| 2     | 14.670    | 4700347 | 140421 | 49.336  | 47.213   |
| Total |           | 9527183 | 297419 | 100.000 | 100.000  |

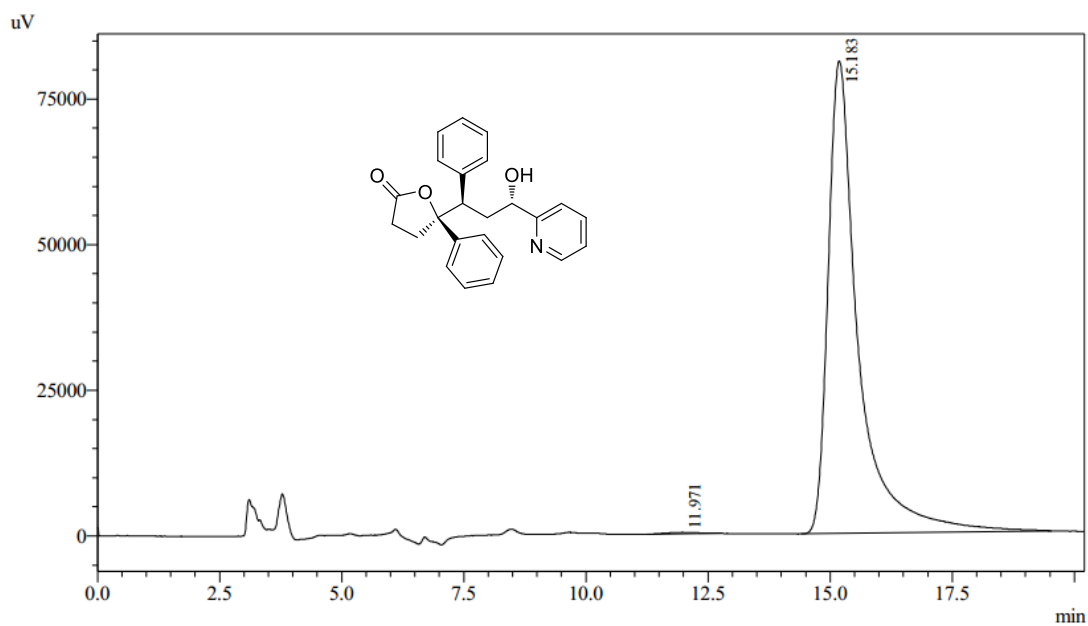

1 Det.A Ch1 / 254nm

Detector A Ch1 254nm

| Peak# | Ret. Time | Area    | Height | Area %  | Height % |
|-------|-----------|---------|--------|---------|----------|
| 1     | 11.971    | 9960    | 242    | 0.283   | 0.298    |
| 2     | 15.183    | 3504420 | 81104  | 99.717  | 99.702   |
| Total |           | 3514380 | 81346  | 100.000 | 100.000  |



<sup>1</sup>H NMR, <sup>13</sup>C NMR and HPLC of 4'

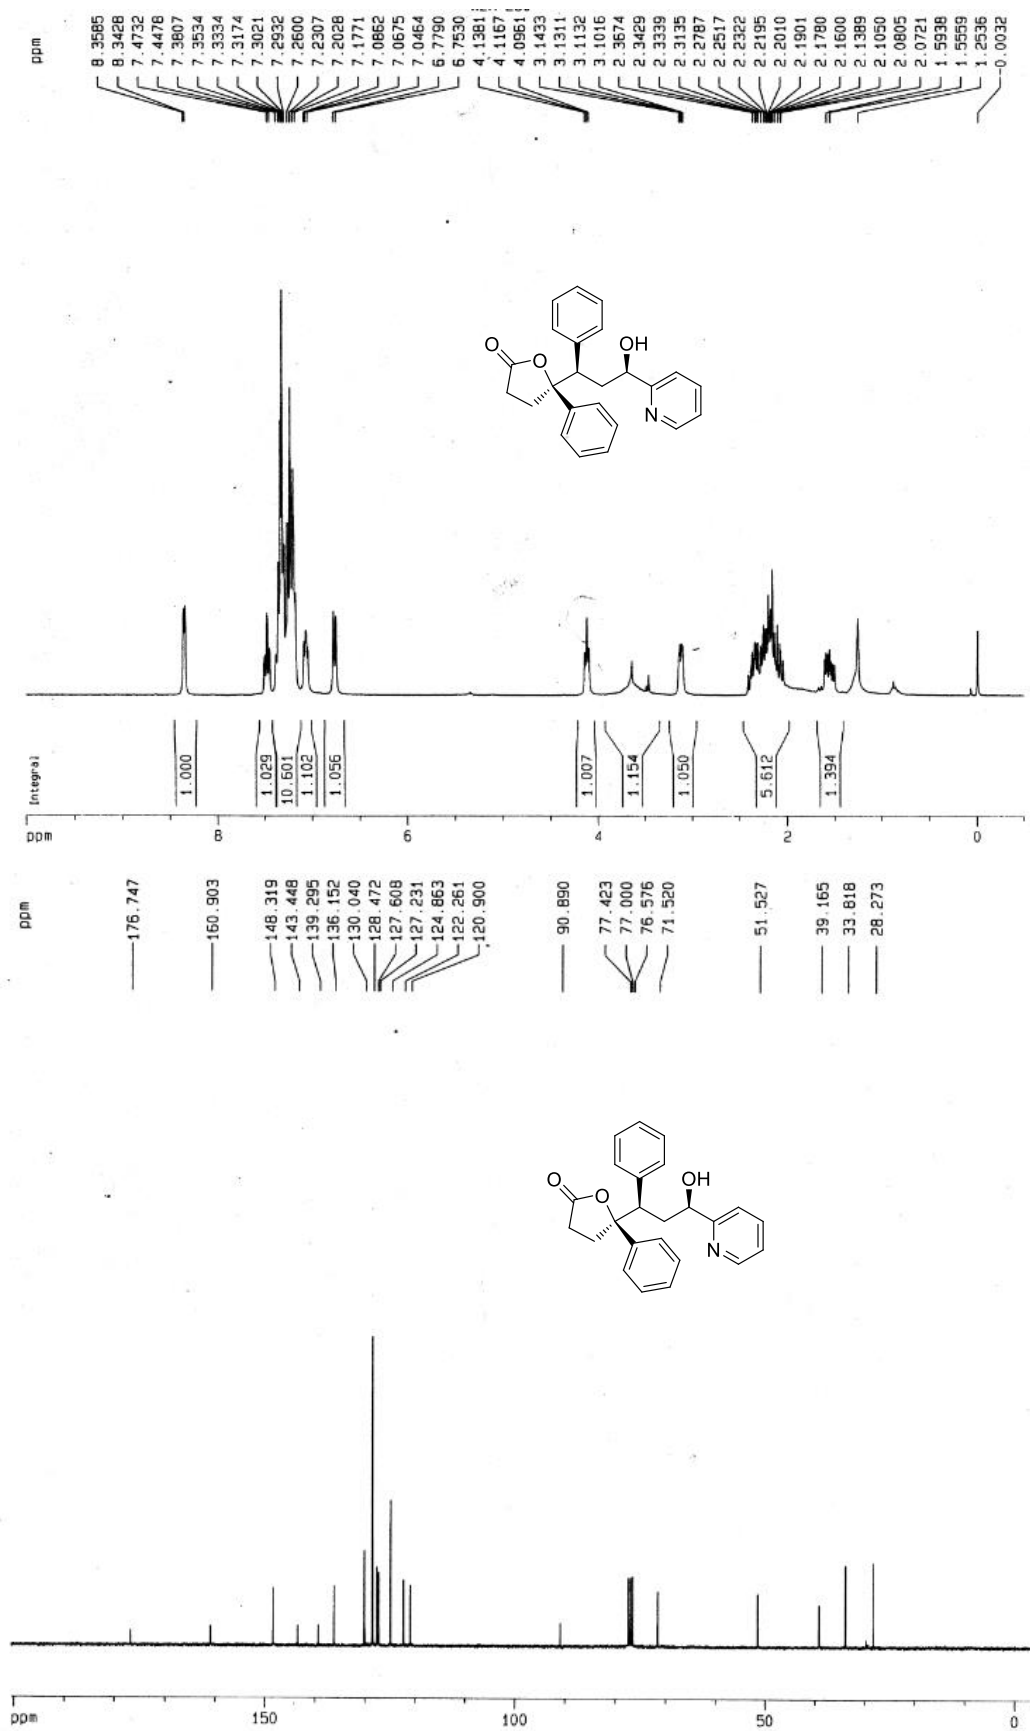

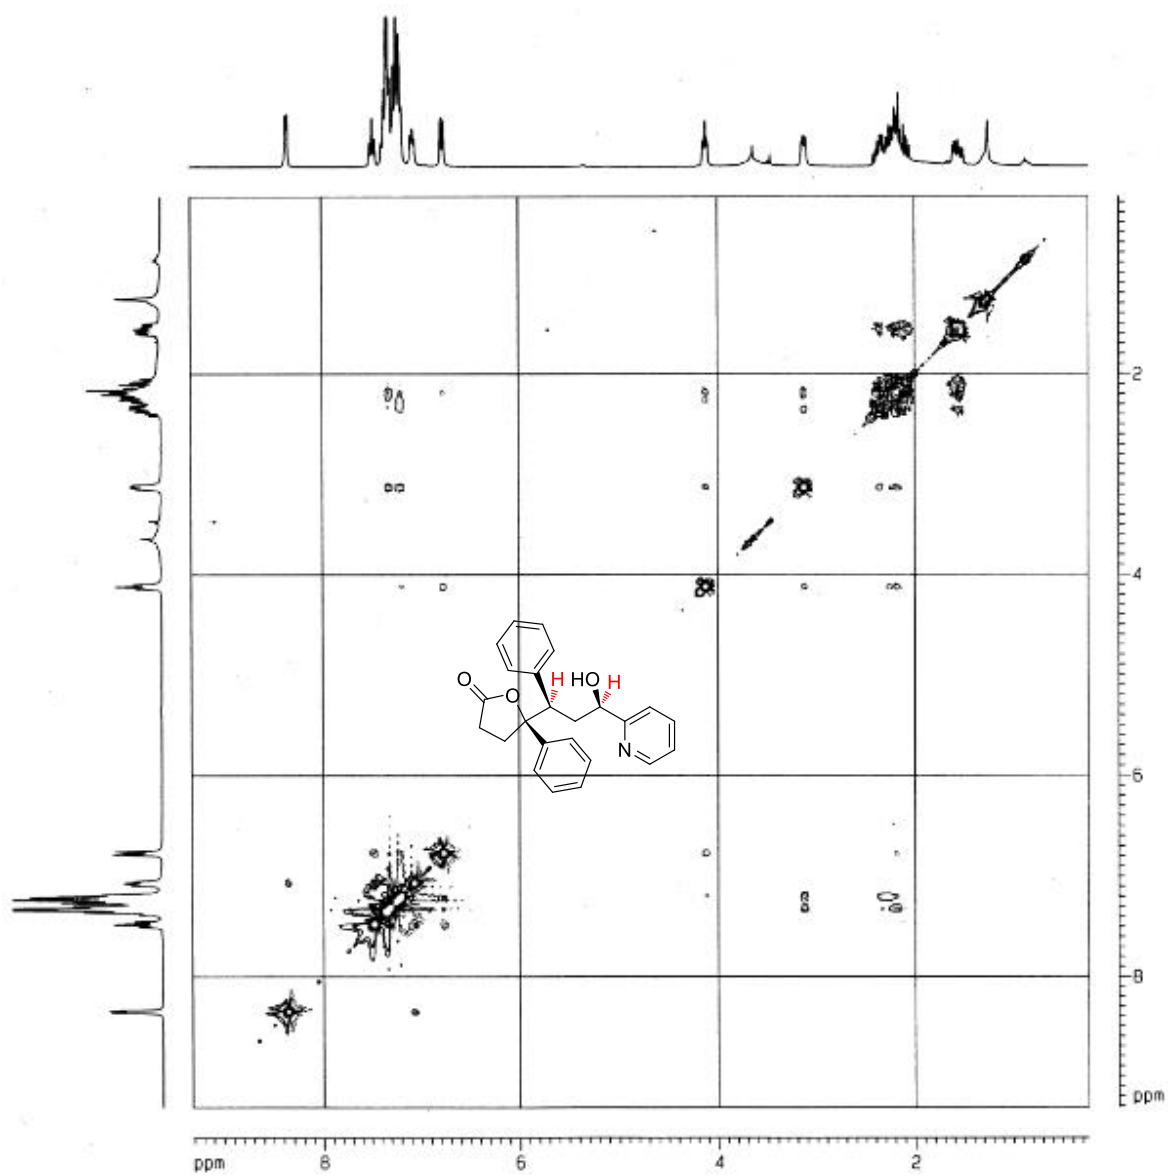

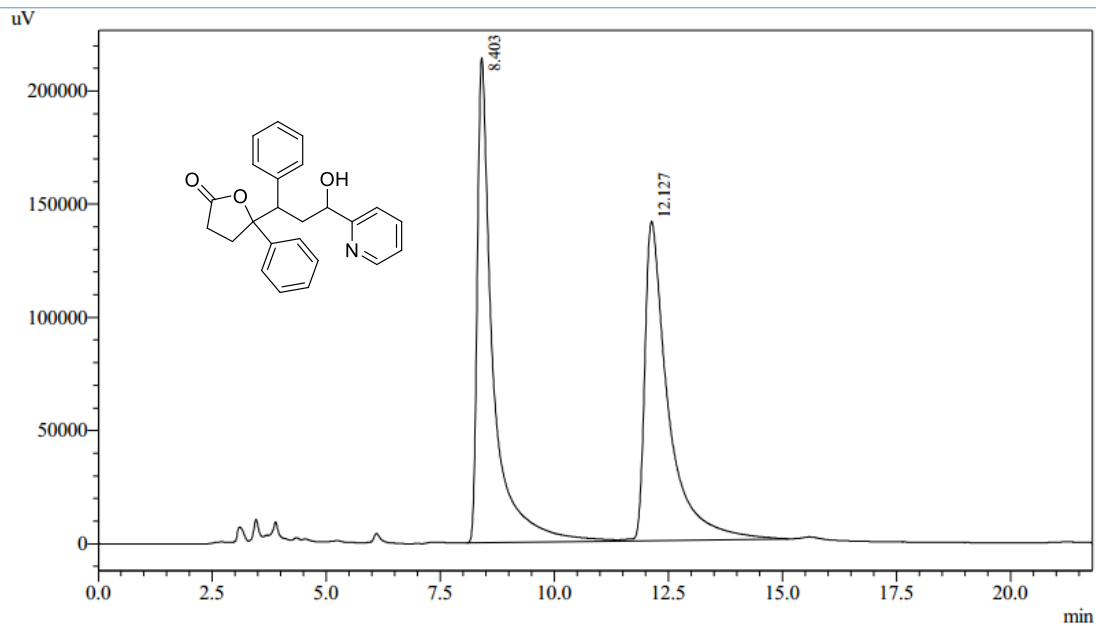

1 Det.A Ch1 / 254nm

Detector A Ch1 254nm

| Peak# | Ret. Time | Area     | Height | Area %  | Height % |
|-------|-----------|----------|--------|---------|----------|
| 1     | 8.403     | 5119714  | 214293 | 50.393  | 60.310   |
| 2     | 12.127    | 5039852  | 141027 | 49.607  | 39.690   |
| Total |           | 10159566 | 355320 | 100.000 | 100.000  |

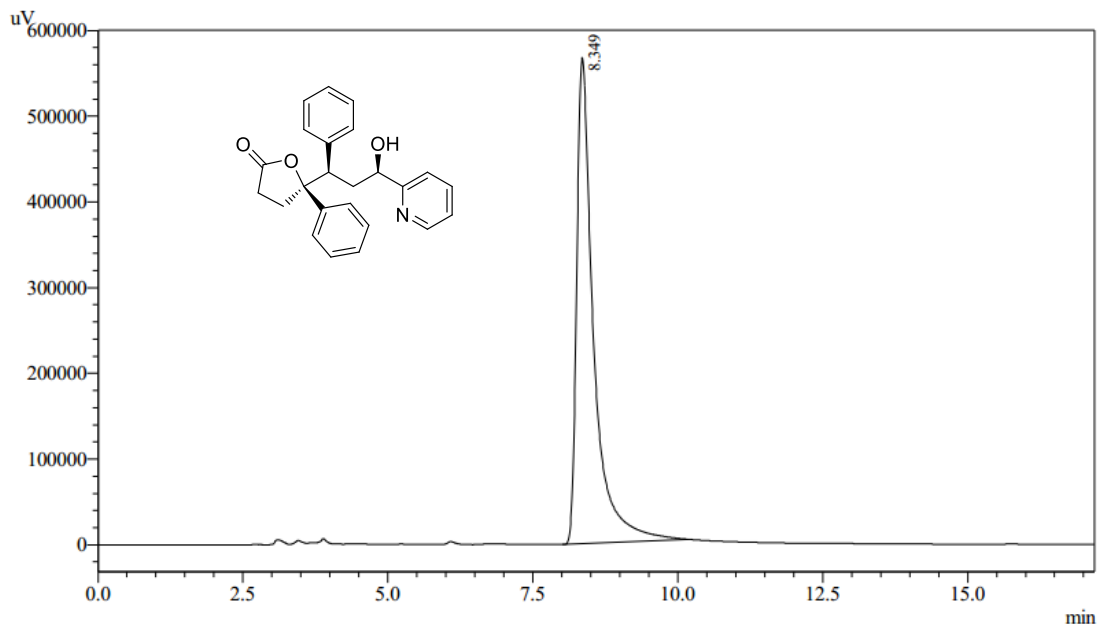

1 Det.A Ch1 / 254nm

Detector A Ch1 254nm

| Peak# | Ret. Time | Area     | Height | Area %  | Height % |
|-------|-----------|----------|--------|---------|----------|
| 1     | 8.349     | 11508260 | 567283 | 100.000 | 100.000  |
| Total |           | 11508260 | 567283 | 100.000 | 100.000  |

<sup>1</sup>H NMR, <sup>13</sup>C NMR and HPLC of 8

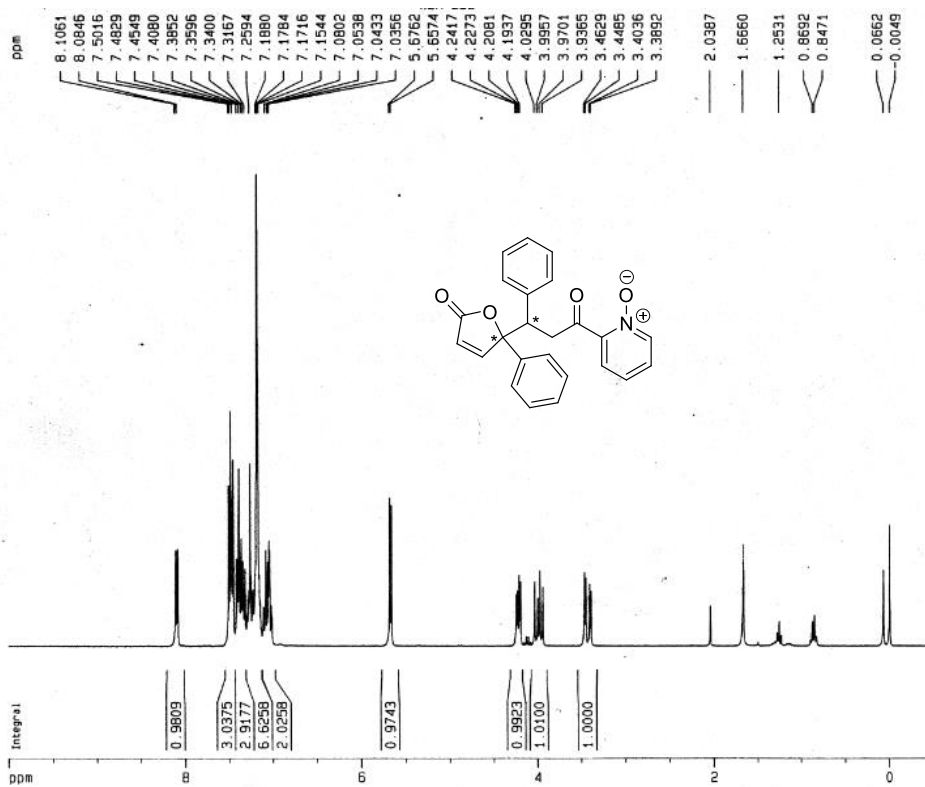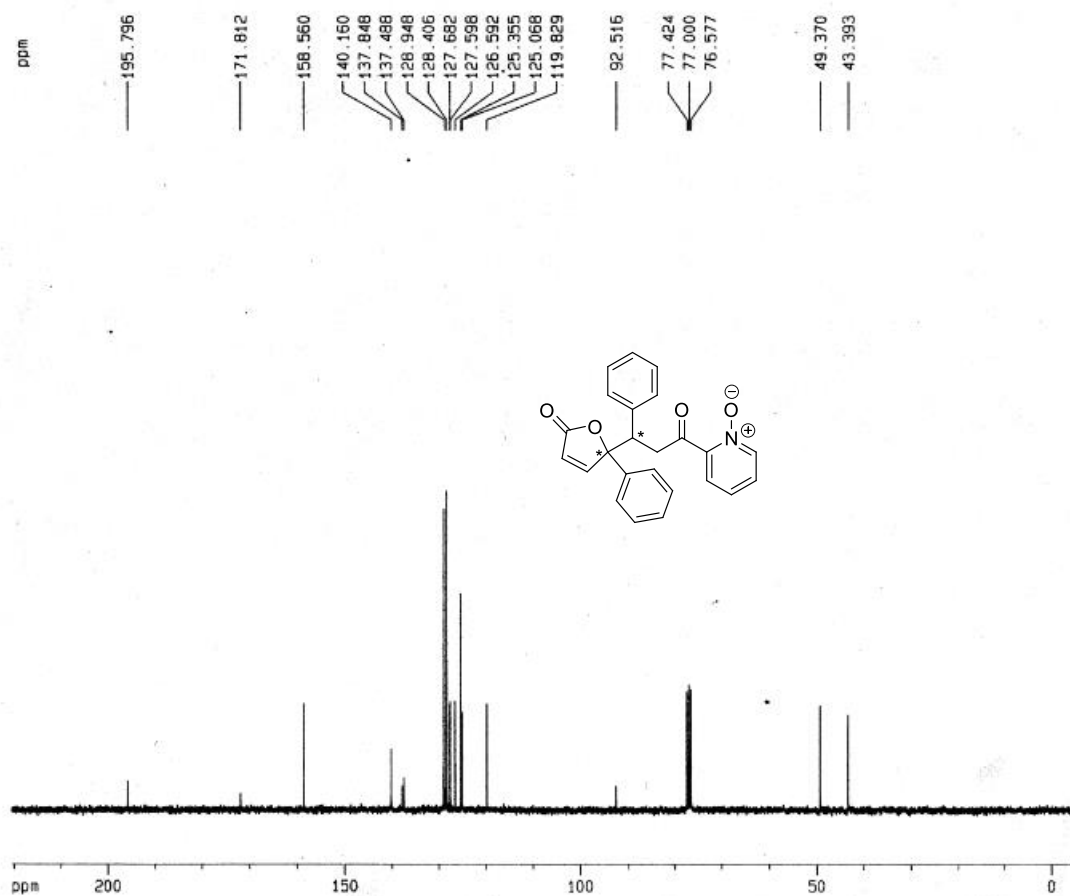

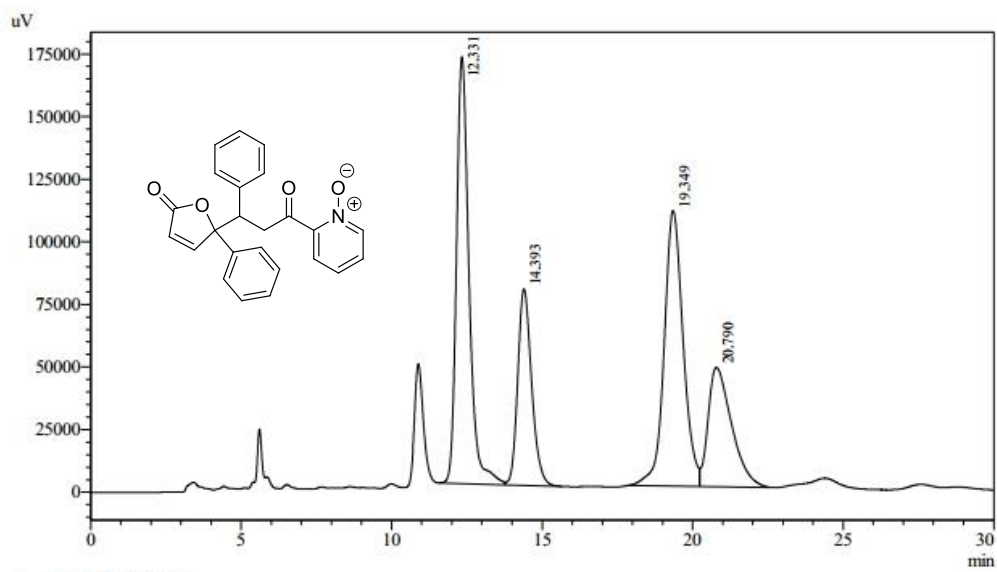

Detector A Ch1 254nm

| Peak# | Ret. Time | Area     | Height | Area %  | Height % |
|-------|-----------|----------|--------|---------|----------|
| 1     | 12.331    | 4894620  | 170414 | 33.054  | 41.925   |
| 2     | 14.393    | 2499092  | 78413  | 16.877  | 19.291   |
| 3     | 19.349    | 4836453  | 110017 | 32.661  | 27.066   |
| 4     | 20.790    | 2577858  | 47633  | 17.409  | 11.719   |
| Total |           | 14808023 | 406478 | 100.000 | 100.000  |

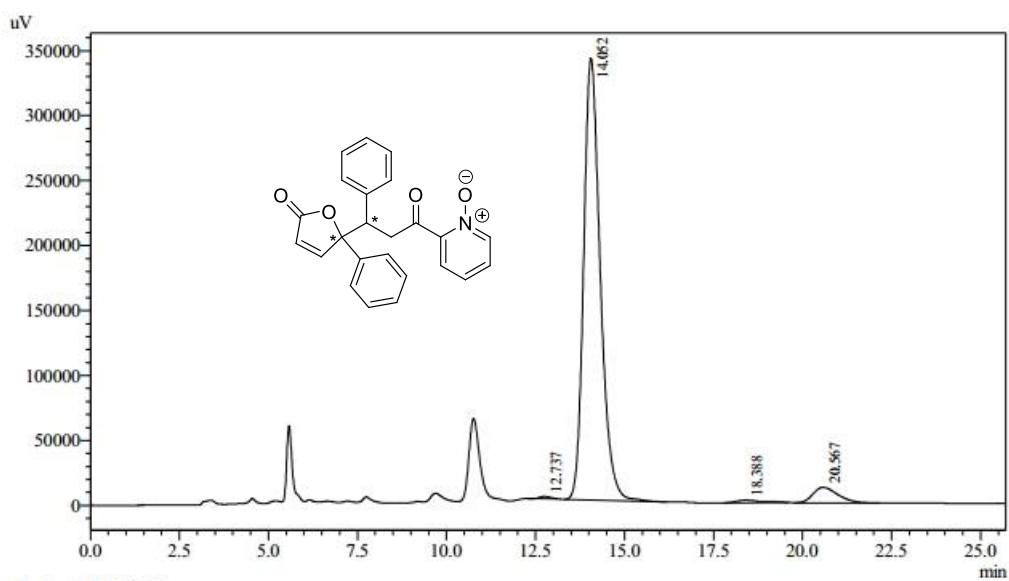

Detector A Ch1 254nm

| Peak# | Ret. Time | Area     | Height | Area %  | Height % |
|-------|-----------|----------|--------|---------|----------|
| 1     | 12.737    | 35378    | 1732   | 0.301   | 0.487    |
| 2     | 14.052    | 11029117 | 340209 | 93.828  | 95.578   |
| 3     | 18.388    | 105441   | 2075   | 0.897   | 0.583    |
| 4     | 20.567    | 584735   | 11933  | 4.974   | 3.352    |
| Total |           | 11754671 | 355950 | 100.000 | 100.000  |



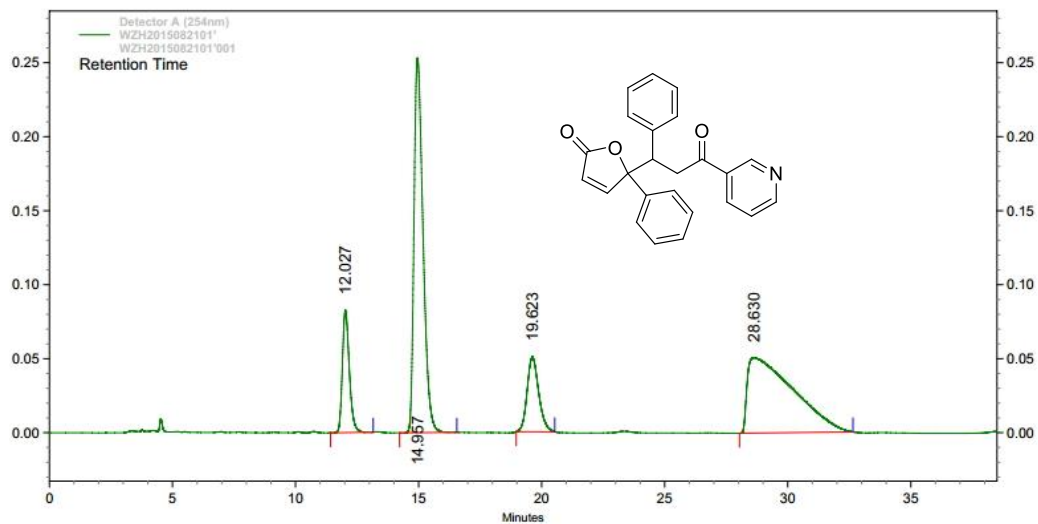

Detector  
A  
(254nm)

| Pk # | Retention Time | Height | Height Percent | Area    | Area Percent |
|------|----------------|--------|----------------|---------|--------------|
| 1    | 12.027         | 82600  | 18.90          | 1612195 | 9.89         |
| 2    | 14.957         | 253104 | 57.91          | 6456513 | 39.60        |
| 3    | 19.623         | 50479  | 11.55          | 1650610 | 10.12        |
| 4    | 28.630         | 50860  | 11.64          | 6584464 | 40.39        |

| Totals |  | 437043 | 100.00 | 16303782 | 100.00 |
|--------|--|--------|--------|----------|--------|
|--------|--|--------|--------|----------|--------|

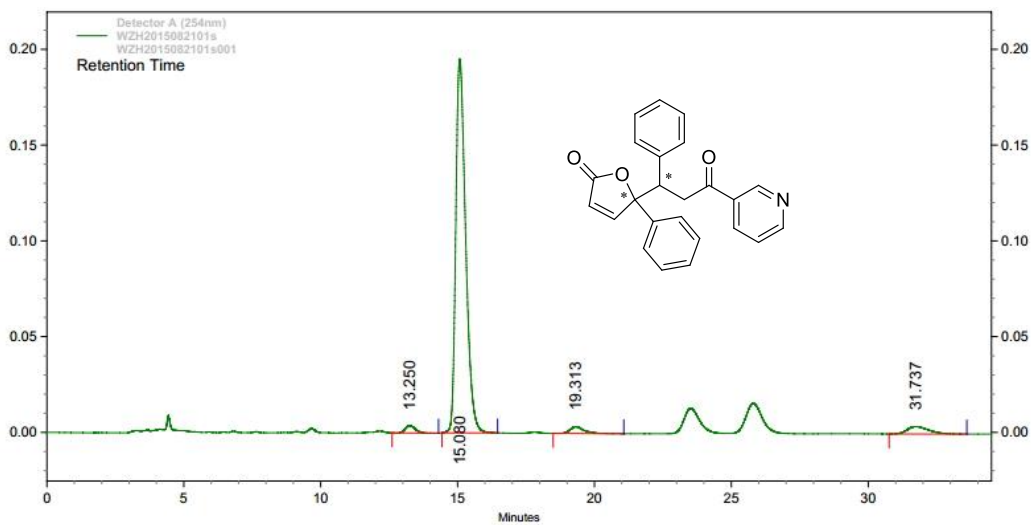

Detector  
A  
(254nm)

| Pk # | Retention Time | Height | Height Percent | Area    | Area Percent |
|------|----------------|--------|----------------|---------|--------------|
| 1    | 13.250         | 3895   | 1.89           | 95530   | 1.80         |
| 2    | 15.080         | 195273 | 94.56          | 4877266 | 91.87        |
| 3    | 19.313         | 3510   | 1.70           | 125367  | 2.36         |
| 4    | 31.737         | 3835   | 1.86           | 210763  | 3.97         |

| Totals |  | 206513 | 100.00 | 5308926 | 100.00 |
|--------|--|--------|--------|---------|--------|
|--------|--|--------|--------|---------|--------|

<sup>1</sup>H NMR, <sup>13</sup>C NMR and HPLC of 12

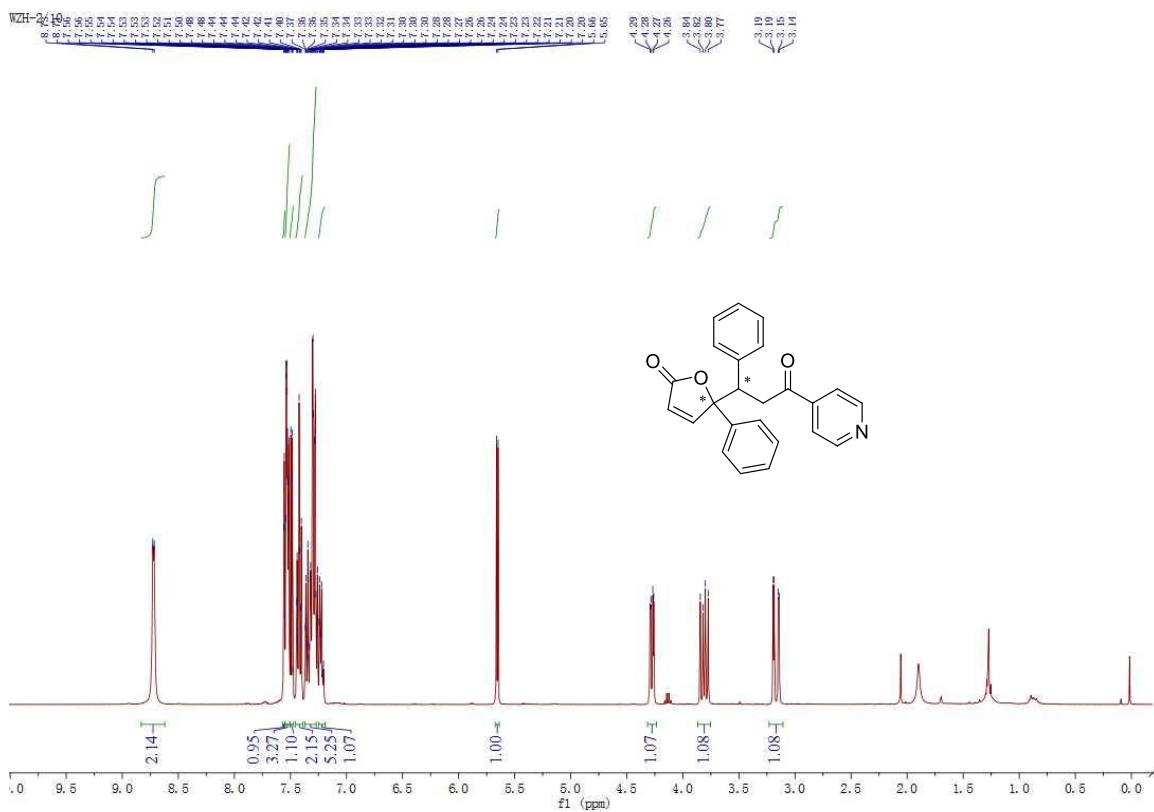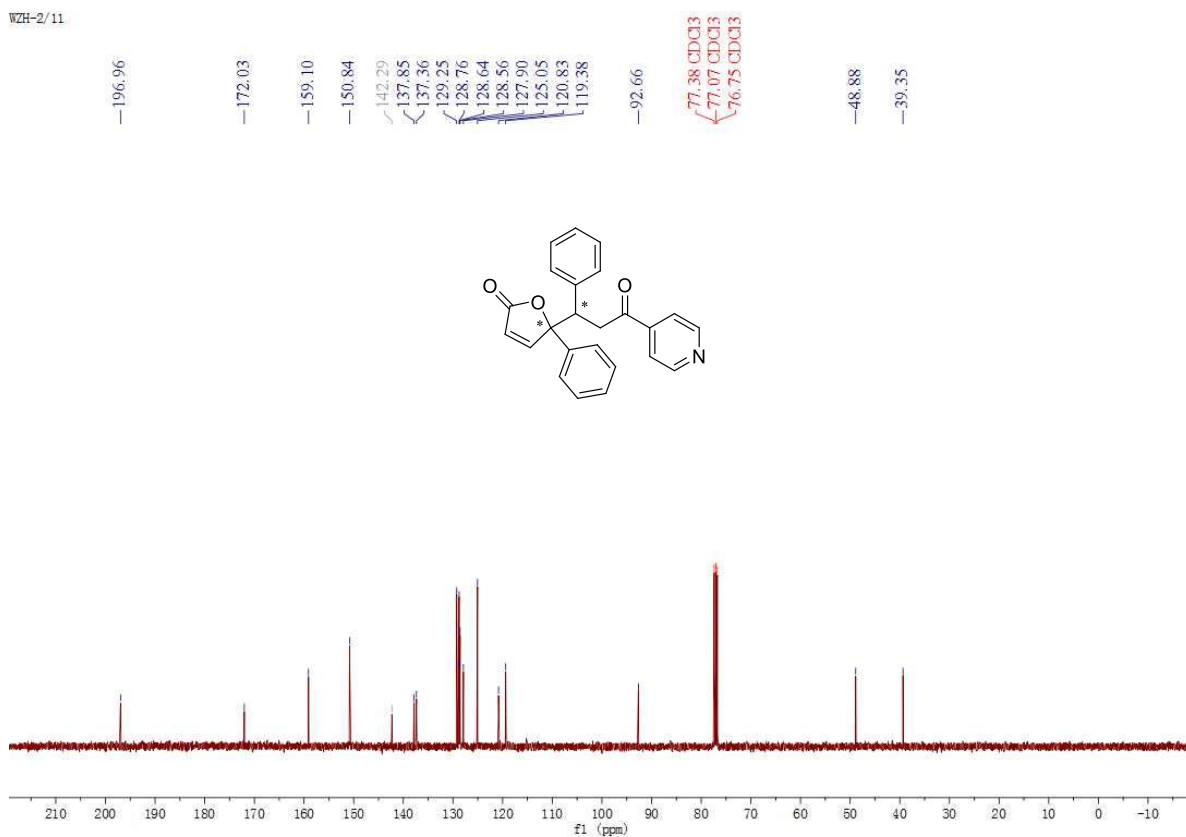



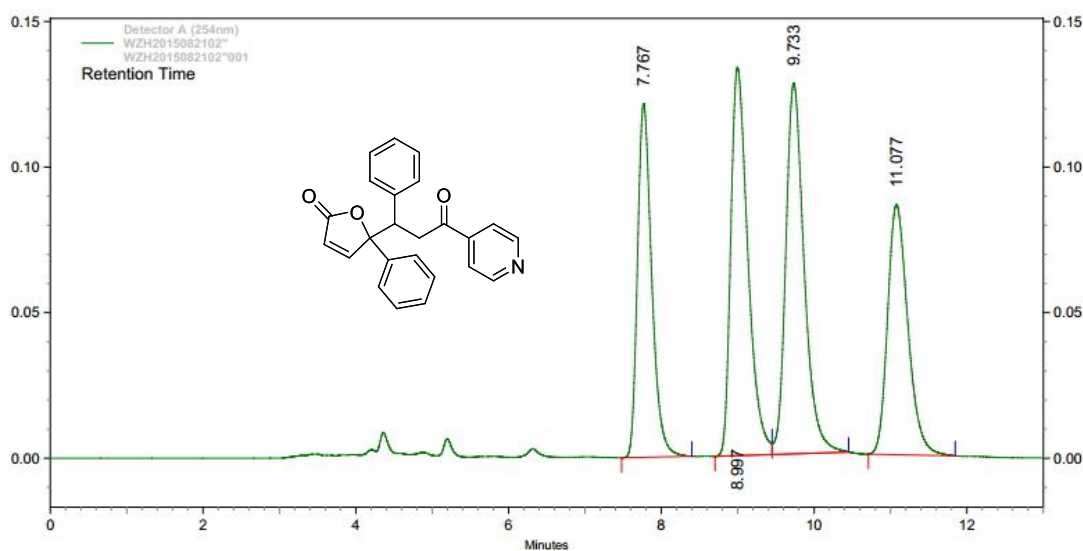

Detector  
A  
(254nm)

| Pk # | Retention Time | Height | Height Percent | Area    | Area Percent |
|------|----------------|--------|----------------|---------|--------------|
| 1    | 7.767          | 121546 | 25.95          | 1569934 | 21.34        |
| 2    | 8.997          | 133419 | 28.49          | 2075534 | 28.21        |
| 3    | 9.733          | 127408 | 27.20          | 2127633 | 28.92        |
| 4    | 11.077         | 85983  | 18.36          | 1583946 | 21.53        |

| Totals |  | 468356 | 100.00 | 7357047 | 100.00 |
|--------|--|--------|--------|---------|--------|
|--------|--|--------|--------|---------|--------|

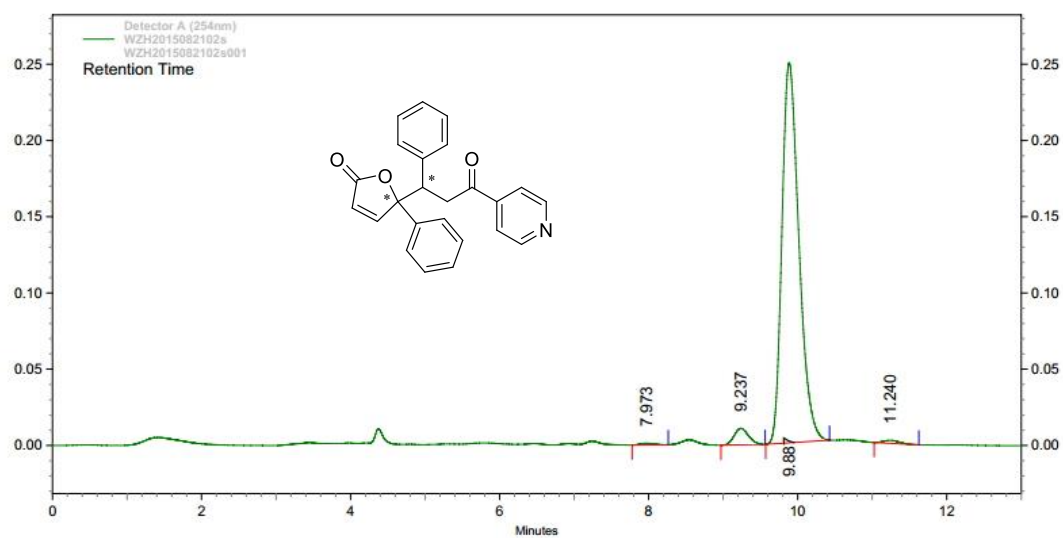

Detector  
A  
(254nm)

| Pk # | Retention Time | Height | Height Percent | Area    | Area Percent |
|------|----------------|--------|----------------|---------|--------------|
| 1    | 7.973          | 1086   | 0.41           | 13029   | 0.32         |
| 2    | 9.237          | 10794  | 4.10           | 144682  | 3.51         |
| 3    | 9.887          | 249213 | 94.74          | 3938670 | 95.49        |
| 4    | 11.240         | 1952   | 0.74           | 28342   | 0.69         |

| Totals |  | 263045 | 100.00 | 4124723 | 100.00 |
|--------|--|--------|--------|---------|--------|
|--------|--|--------|--------|---------|--------|
